# Supplementary material for: Transition metal free, late-stage, regiospecific, aromatic fluorination on a preparative scale using a KF/crypt-222 complex
Source: Royal Society of Chemistry journal article supplement (doi:10.1039/c8ra03757d), 2018-01-01
Supplement: c8ra03757d1.pdf [file c8ra03757d1.pdf]

# Transition metal free, late-stage, regiospecific, aromatic fluorination on preparative scale using KF/Crypt-222 complex

Jimmy Erik Jakobsson\*<sup>a</sup> and Patrick Johannes Riss<sup>abc</sup>

<sup>a</sup>Realomics Strategic Research Initiative, Department of Chemistry, Faculty for Mathematics and Natural Sciences, University of Oslo, Norway. E-mail: j.e.jakobsson@kjemi.uio.no

<sup>b</sup>Department of Surgery and Neuroscience, OUS-Rikshospitalet HF, Oslo, Norway

<sup>c</sup>Norwegian Medical Cyclotron AS, Nydalen, Oslo, Norway

## Table of Contents

|                                                                                            |    |
|--------------------------------------------------------------------------------------------|----|
| Experimental part .....                                                                    | 2  |
| Synthesis .....                                                                            | 2  |
| Typical procedure A (ylide synthesis) (procedure is based on Cardinale <i>et. al.</i> .... | 3  |
| Typical procedure B (ylide synthesis).....                                                 | 4  |
| NMR reactions screening .....                                                              | 14 |
| Typical procedure .....                                                                    | 14 |
| NMR analysis.....                                                                          | 14 |
| Radiochemistry .....                                                                       | 14 |
| Additional experiments.....                                                                | 17 |
| NMR .....                                                                                  | 19 |
| RadioTLC.....                                                                              | 47 |
| NMR degradation experiment .....                                                           | 54 |
| Additional NMR spectra.....                                                                | 58 |

## Experimental part

Reactants, reagents and solvents used herein were procured from Sigma-Aldrich (Sigma-Aldrich AS, Norway) or Fluorochem (UK) in analytical quality unless specified otherwise. Reactions were performed under an atmosphere of nitrogen. Solid phase extraction (SPE) cartridges were purchased from VWR (VWR International, Darmstadt, Germany). Nuclear magnetic resonance spectra were recorded on a Bruker AVII 400 NMR instrument (Bruker ASX Nordic AB). Chemical shifts ( $\delta$ ) for  $^1\text{H}$  (400 MHz),  $^{13}\text{C}$  (100 MHz) and  $^{19}\text{F}$  (377 MHz). Resonances are reported in parts per million (ppm), relative to the solvent signal ( $\text{CDCl}_3$   $\delta = 7.226$  ppm), downfield from the expected tetramethylsilane signal (TMS,  $\delta = 0$  ppm). Mass spectrometry was conducted on a Q-ToF-2 mass analyser (Micromass, Q-ToF-2<sup>TM</sup>) using electron spray ionization in positive mode (+ESI). For quality control and analysis of the radiochemical yield, a Phenomenex Luna PFP(2) column (5  $\mu\text{m}$ , 100  $\text{\AA}$ , 250 mm  $\times$  4.6 mm) was used as a stationary phase with an isocratic mixture of MeCN-water as a mobile phase at a flow rate of 1.5 ml/min. RadioTLC was conducted on Silica gel 60 F<sub>254</sub> coated aluminum TLC plates (Supelco, USA). RadioTLC plates were analysed using a raytest miniGita radioTLC scanner (Raytest GmbH, Straubenhardt, Germany). All other radioactivity measurements during labelling experiments and radiotracer productions were performed using a Wallac Wizard well counter (PerkinElmer, Oslo, Norway). Additional Reference compounds were synthesised by Jakobsson *et. al.*<sup>1</sup> (**11**) or purchased from Sigma Aldrich and Fluorochem (**2-10**).

## Synthesis

**KF/Crypt-222/K<sub>2</sub>CO<sub>3</sub> (3:4:1).** To (4,7,13,16,21,24-Hexaoxa-1,10-diazabicyclo[8.8.8]hexacosane) (200  $\mu\text{mol}$ , 75.3 mg) in MeCN (5 ml) was added KF (17.4 mg, 150  $\mu\text{mol}$ ) and potassium carbonate \* 1.5 hydrate (6.9 mg, 50  $\mu\text{mol}$ ) from water (1 ml). The solvents were removed under reduced pressure at 50  $^{\circ}\text{C}$  with portion wise additions of MeCN until reaction mixture solidified. The mixture was dried on high vac overnight, powdered and dried an additional day.

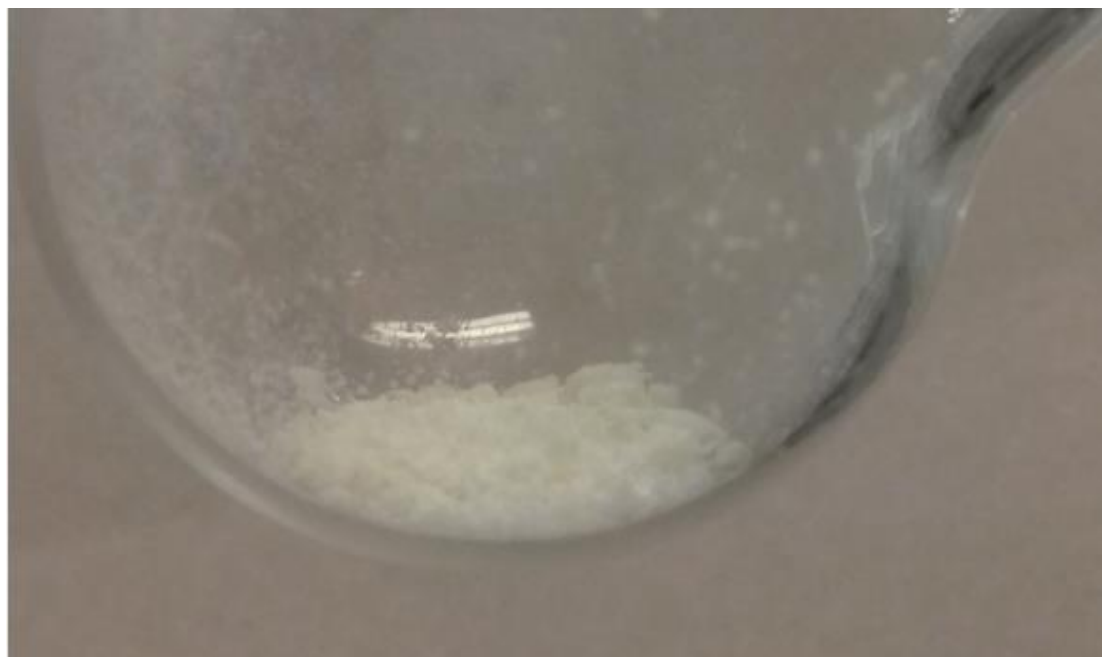

Figure 1: Shows KF/Crypt-222 complex after drying

Tetrabutylammonium tetra(*tert*butyl alcohol) was synthesised in accordance with Kim *et. al.*<sup>2</sup> Analytical data matched.

**Typical procedure A (ylide synthesis) (procedure is based on Cardinale *et. al.*<sup>3</sup>**

Reaction mixtures were kept in the dark at all times. In a glass vial was 3-chloroperbenzoic acid (77%, 1.4 mmol, 310 mg) dissolved in DCM (5 ml) and left for 5 minutes (excess water adhered to glass walls of vial). To iodoarene (1 mmol) in a capped argon flushed vial was added the 3-chloroperbenzoic acid solution, care was taken to avoid transferring water droplets. The reaction mixture was heated to 39 degrees for 80 minutes. Major to full consumption of starting material was indicated via TLC analysis (8% MeOH in DCM), (under UV light was all intermediate compounds visible in red that upon iodine staining yielded cream white coloured crescents. The reaction mixture was cooled to 10-15 °C. In one portion was added KOH (10 mmol, 560 mg) and 2,2-dimethyl-1,3-dioxane-4,6-dione (1.3 mmol, 187 mg). The reaction mixture was kept for 10– 60 minutes until complete conversion of intermediate was observed via TLC analysis (8% MeOH in DCM) (new in UV light visible bands that upon iodine staining stain in cream white, typically  $R_f$  is similar to intermediate). The reaction mixture was diluted with DCM (10 ml), filtered through a filter paper, washed with DCM (10 ml) and dried over sodium sulfate. The drying agent was filtered off and solvent removed under reduced pressure at 20-22 °C. The crude solids were dissolved in a minimal amount of DCM and filtered through a filter paper. The compounds were purified via precipitation from addition of hexanes (20 ml). The flasks were left at -20 for 1 hour. The pure ylides were obtained via decanting the solvents and solids washed with hexanes.

### Typical procedure B (ylide synthesis)

To  $\lambda^3$ -iodane diacetate (1 mmol) in DCM (5 ml) at 10-15 °C was added in one portion KOH (10 mmol, 560 mg) and 2,2-dimethyl-1,3-dioxane-4,6-dione (1.3 mmol, 187 mg) and the reaction mixture kept for 10 min – 60 minutes until complete conversion of intermediate was observed via TLC analysis (8% MeOH in DCM) (new in UV light visible bands that upon iodine staining stain in cream white, typically  $R_f$  is very similar to intermediate). The reaction mixture was diluted with DCM (10 ml), filtered through cotton and glass wool, washed with DCM (10 ml) and dried over sodium sulfate. The drying agent was filtered off and the solvent removed in an aluminium foil wrapped round bottom flask under reduced pressure at 22 °C. The crude solids were purified via precipitation from dissolving in DCM (10 ml) and adding hexanes (20 ml). The flasks were left at -20 for 1 hour. The pure ylides were obtained via decanting the solvents and washed with hexanes.

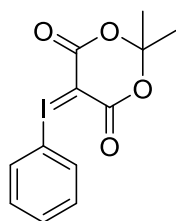

**Synthesised according to typical procedure B. 2,2-dimethyl-5-(phenyl-13-iodaneylidene)-1,3-dioxane-4,6-dione.** Reaction performed on 1 mmol scale yielding target compound in 60% yield (206 mg, 0.6 mmol) as white solids.  $^1\text{H}$  NMR (400 MHz,  $\text{DMSO-}d_6$ )  $\delta$  7.83 – 7.75 (m, 2H), 7.60 – 7.51 (m, 1H), 7.46 (dd,  $J = 8.4, 7.0$  Hz, 2H), 1.56 (s, 6H).  $^{13}\text{C}$  NMR (101 MHz,  $\text{DMSO}$ )  $\delta$  162.8, 132.5, 131.0, 130.6, 116.3, 102.7, 57.8, 25.6. Analytical data was in accordance to that previously reported.<sup>4</sup> HR-ESIMS:  $m/z$  368.9595  $[\text{M}+\text{Na}]^+$  ( $\text{C}_{12}\text{H}_{11}\text{INaO}_4^+$ , calculated 368.9594)

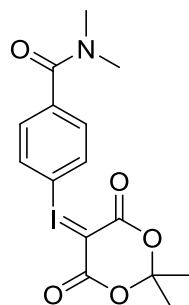

**Synthesised according to typical procedure A. 4-((2,2-dimethyl-4,6-dioxo-1,3-dioxan-5-ylidene)-13-iodaneyl)-N,N-dimethylbenzamide.** Reaction performed on 0.5 mmol scale yielding target compound in 14% yield (60 mg, 0.14 mmol) as white solids.  $^1\text{H}$  NMR (400 MHz,  $\text{DMSO-}d_6$ )  $\delta$  7.86 – 7.80 (m, 1H), 7.51 – 7.44 (m, 1H), 2.98 (s, 2H), 2.86 (s, 2H), 1.58 (s,

3H).  $^{13}\text{C}$  NMR (101 MHz, DMSO)  $\delta$  168.7, 162.9, 138.7, 132.3, 129.3, 116.7, 102.8, 57.8, 38.9, 34.7, 25.6. HR-ESIMS:  $m/z$  439.9966  $[\text{M}+\text{Na}]^+$  ( $\text{C}_{15}\text{H}_{16}\text{INaO}_5^+$ , calculated 439.9965)

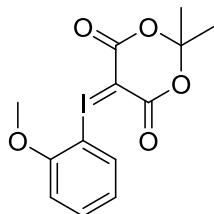

*Synthesised according to typical procedure A.* 5-((2-methoxyphenyl)-13-iodaneylidene)-2,2-dimethyl-1,3-dioxane-4,6-dione. Reaction performed on 2 mmol scale yielding target compound in 50% yield (379 mg, 1.01 mmol) as white solids.  $^1\text{H}$  NMR (400 MHz, Chloroform- $d$ )  $\delta$  7.47 (ddd,  $J = 8.4, 7.4, 1.5$  Hz, 1H), 7.35 (dd,  $J = 8.1, 1.5$  Hz, 1H), 7.09 (ddd,  $J = 8.4, 7.4, 1.3$  Hz, 1H), 6.97 (dd,  $J = 8.2, 1.2$  Hz, 1H), 3.97 (s, 3H), 1.79 (s, 6H).  $^{13}\text{C}$  NMR (101 MHz,  $\text{CDCl}_3$ )  $\delta$  163.75, 155.29, 132.85, 128.82, 124.62, 112.48, 104.82, 101.81, 57.12, 47.56, 26.16. HR-ESIMS:  $m/z$  398.9700  $[\text{M}+\text{Na}]^+$  ( $\text{C}_{13}\text{H}_{13}\text{INaO}_5^+$ , calculated 398.9700)

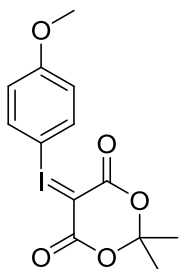

*Synthesised according to typical procedure A.* **5-((4-methoxyphenyl)-13-iodaneylidene)-2,2-dimethyl-1,3-dioxane-4,6-dione.** Reaction performed on 1 mmol scale yielding target compound in 54% yield (203 mg, 0.54 mmol) as white solids. Analytical data was in accordance to that previously reported.<sup>ii</sup>  $^1\text{H}$  NMR (400 MHz,  $\text{DMSO}-d_6$ )  $\delta$  7.74 – 7.68 (m, 2H), 7.04 – 6.98 (m, 2H), 3.78 (s, 3H), 1.54 (s, 6H).  $^{13}\text{C}$  NMR (101 MHz, DMSO)  $\delta$  162.8, 161.1, 134.7, 116.6, 105.8, 102.6, 58.5, 55.5, 25.6. **HR-ESIMS:**  $m/z$  398.9700  $[\text{M}+\text{Na}]^+$  ( $\text{C}_{13}\text{H}_{13}\text{INaO}_5^+$ , calculated 398.9700)

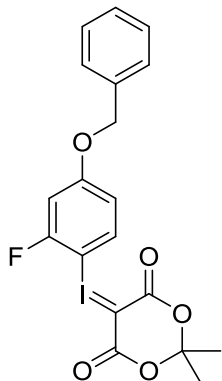

Synthesised according to typical procedure A. **5-((4-(benzyloxy)-2-fluorophenyl)-13-iodaneylidene)-2,2-dimethyl-1,3-dioxane-4,6-dione**. Reaction performed on 1 mmol scale yielding target compound in 41% yield (192 mg, 0.41 mmol) as beige solids.  $^1\text{H}$  NMR (400 MHz,  $\text{DMSO-}d_6$ )  $\delta$  7.81 (dd,  $J = 8.8, 7.0$  Hz, 1H), 7.59 – 7.30 (m, 5H), 7.15 (dd,  $J = 10.4, 2.7$  Hz, 1H), 6.94 (dd,  $J = 8.9, 2.7$  Hz, 1H), 5.17 (s, 2H), 1.50 (s, 6H).  $^{19}\text{F}$  NMR (377 MHz,  $\text{DMSO}$ )  $\delta$  -96.5.  $^{13}\text{C}$  NMR (101 MHz,  $\text{DMSO}$ )  $\delta$  162.6, 162.4 (d,  $^3J_{\text{CF}} = 11$  Hz), 160.5 (d,  $^1J_{\text{CF}} = 248$  Hz), 136.9 (d,  $^4J_{\text{CF}} = 4$  Hz), 135.9, 128.5, 128.2, 127.9, 113.8 (d,  $^3J_{\text{CF}} = 3$  Hz), 103.0 (d,  $2J_{\text{CF}} = 26$  Hz), 102.5, 93.8 (d,  $2J_{\text{CF}} = 26$  Hz), 70.1, 59.3, 25.5. HR-ESIMS:  $m/z$  492.9919  $[\text{M}+\text{Na}]^+$  ( $\text{C}_{19}\text{H}_{16}\text{FINaO}_5^+$ , calculated 492.9919)

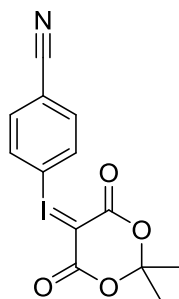

Synthesised according to typical procedure A. **4-((2,2-dimethyl-4,6-dioxo-1,3-dioxan-5-ylidene)-13-iodaneyl)benzonitrile**. Reaction performed on 1 mmol scale yielding target compound in 21% yield (77 mg, 0.21 mmol) as white solids.  $^1\text{H}$  NMR (400 MHz,  $\text{DMSO-}d_6$ )  $\delta$  7.91 – 7.82 (m, 4H), 1.51 (s, 6H).  $^{13}\text{C}$  NMR (101 MHz,  $\text{DMSO}$ )  $\delta$  162.9, 134.3, 132.9, 121.3, 117.7, 113.4, 103.0, 58.2, 25.6. **HR-ESIMS:**  $m/z$  393.9546  $[\text{M}+\text{Na}]^+$  ( $\text{C}_{13}\text{H}_{10}\text{INNaO}_4^+$ , calculated 393.9547)

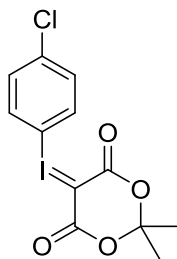

Synthesised according to typical procedure A. **5-((4-chlorophenyl)-13-iodaneylidene)-2,2-dimethyl-1,3-dioxane-4,6-dione**. Reaction performed on 2 mmol scale yielding target compound in 25% yield (194 mg, 0.50 mmol) as white solids.  $^1\text{H}$  NMR (400 MHz,  $\text{DMSO-}d_6$ )  $\delta$  7.82 – 7.76 (m, 2H), 7.58 – 7.52 (m, 2H), 1.57 (s, 6H).  $^{13}\text{C}$  NMR (101 MHz,  $\text{DMSO}$ )  $\delta$  162.8, 135.8, 134.2, 130.9, 114.2, 102.8, 58.3, 25.6. HR-ESIMS:  $m/z$  402.9205  $[\text{M}+\text{Na}]^+$  ( $\text{C}_{12}\text{H}_{10}\text{ClINaO}_4^+$ , calculated 402.9204)

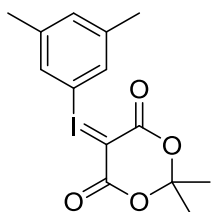

Synthesised according to typical procedure A. **5-((3,5-dimethylphenyl)-13-iodanylidene)-2,2-dimethyl-1,3-dioxane-4,6-dione.** Reaction performed on 2 mmol scale yielding target compound in 41% yield (310 mg, 0.83 mmol) as white solids.  $^1\text{H}$  NMR (400 MHz,  $\text{DMSO-}d_6$ )  $\delta$  7.44 – 7.39 (m, 2H), 7.19 (dt,  $J = 1.7, 0.9$  Hz, 1H), 2.29 (s, 6H), 1.56 (s, 6H).  $^{13}\text{C}$  NMR (101 MHz,  $\text{DMSO}$ )  $\delta$  162.8, 140.4, 132.2, 129.9, 116.3, 102.6, 57.7, 25.6, 20.7. HR-ESIMS:  $m/z$  396.9907 $[\text{M}+\text{Na}]^+$  ( $\text{C}_{14}\text{H}_{15}\text{INaO}_4^+$ , calculated 396.9907)

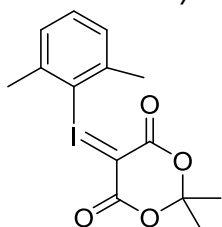

Synthesised according to typical procedure A. **5-((2,6-dimethylphenyl)-13-iodanylidene)-2,2-dimethyl-1,3-dioxane-4,6-dione.** Reaction performed on 1.4 mmol scale yielding target compound in 34% yield (180 mg, 0.48 mmol) as white solids.  $^1\text{H}$  NMR (400 MHz,  $\text{DMSO-}d_6$ )  $\delta$  7.35 (dd,  $J = 8.0, 6.8$  Hz, 1H), 7.24 (d,  $J = 7.4$  Hz, 2H), 2.68 (s, 6H), 1.46 (s, 6H).  $^{13}\text{C}$  NMR (101 MHz,  $\text{DMSO}$ )  $\delta$  162.6, 141.5, 131.4, 127.9, 126.6, 102.4, 56.7, 26.5, 25.5. HR-ESIMS:  $m/z$  396.9908 $[\text{M}+\text{Na}]^+$  ( $\text{C}_{14}\text{H}_{15}\text{INaO}_4^+$ , calculated 396.9907)

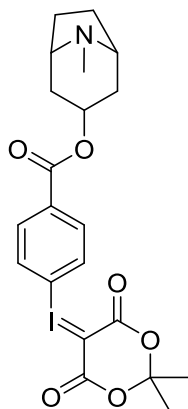

**8-methyl-8-azabicyclo[3.2.1]octan-3-yl 4-((2,2-dimethyl-4,6-dioxo-1,3-dioxan-5-ylidene)-13-iodanyl)benzoate.** To 8-methyl-8-azabicyclo[3.2.1]octan-3-yl 4-iodobenzoate (165 mg, 0.44 mmol) in  $\text{CHCl}_3$  (1.5 ml) was added TFA (4 ml) and oxone monopersulphate (220 mg, 0.70 mmol) and left at room temperature for 3 hours. The solvent was removed over a stream of nitrogen and the residues dissolved in EtOH (5 ml) and pH adjusted to  $\sim 10$  via addition of 10% w/v  $\text{Na}_2\text{CO}_3$ . 2,2-dimethyl-1,3-dioxane-4,6-

dione (95mg, 0.66 mmol) was added from 10% w/v Na<sub>2</sub>CO<sub>3</sub> (2 ml) and the reaction was left at room temperature for 50 minutes. The reaction mixture was poured into DCM (25 ml) and extracted with 2x25 ml DCM. The combined organic phases were washed with 0.5M Na<sub>2</sub>S<sub>2</sub>O<sub>3</sub> and dried over sodium sulphate. The solvents were removed under reduced pressure and the crude dissolved in DCM and hexanes was added to induce precipitation. The cloudy suspension was subjected to freezer and the target compound (95 mg, 0.19 mmol) was afforded as white solids in 42% via filtration and washed with hexanes. <sup>1</sup>H NMR (400 MHz, DMSO-*d*<sub>6</sub>) δ 7.99 – 7.94 (m, 4H), 5.12 (t, *J* = 5.2 Hz, 1H), 3.08 (broad s, 2H), 2.20 (s, 3H), 2.15 – 2.05 (m, 2H), 2.05 – 1.88 (m, 4H), 1.71 (d, *J* = 14.8 Hz, 2H), 1.58 (s, 6H). <sup>13</sup>C NMR (101 MHz, DMSO) δ 164.1, 162.8, 132.8, 132.2, 131.1, 121.3, 102.8, 68.6, 59.0, 58.0, 39.7, 35.7, 25.6, 25.6. HR-ESIMS: *m/z* 514.0721 [M+H]<sup>+</sup> (C<sub>21</sub>H<sub>25</sub>INO<sub>6</sub><sup>+</sup>, calculated 514.0721).

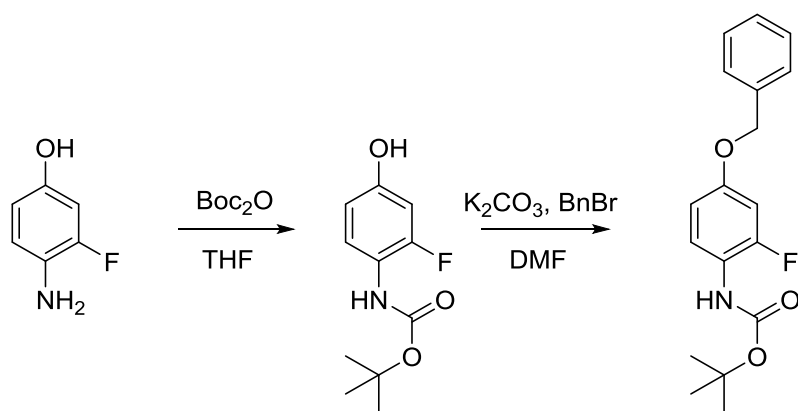

**tert-butyl (4-(benzyloxy)-2-fluorophenyl)carbamate.** To 4-amino-3-fluorophenol (5.59g, 44 mmol) in THF (40 ml) on ice was added di-*tert*-butyl dicarbonate (48.4 mmol, 10.6g) from THF (20 ml). The reaction mixture was stirred overnight. The solvents were removed under reduced pressure. The crude was dissolved in DCM and washed with water and aqueous sat. NaHCO<sub>3</sub>. The organic phase was dried over sodium sulfate and evaporated to dryness under reduced pressure. The black crude was used in the next step without further purification.

To the crude in DMF (30 ml) was added K<sub>2</sub>CO<sub>3</sub> (9.12 g, 66 mmol) and benzyl bromide (5.23 ml, 50.8 mmol) and left over night. The crude was dissolved in DCM and washed with water. The organic phase was dried over sodium sulfate and evaporated to dryness under reduced pressure. The black crude was recrystallized from EtOH yielding the target compound (6.99 g, 22.0 mmol) as brown solids in 50% over 2 steps. <sup>1</sup>H NMR (400 MHz, Chloroform-*d*) δ 7.88 (s, 1H), 7.45 – 7.30 (m, 5H), 6.77 – 6.69 (m, 2H), 6.46 (s, 1H), 5.02 (s, 2H), 1.52 (s, 9H). <sup>19</sup>F NMR (377 MHz, CDCl<sub>3</sub>) δ -129.2. <sup>13</sup>C NMR (101 MHz, CDCl<sub>3</sub>) δ 155.0 (d, <sup>3</sup>*J*<sub>CF</sub> = 11 Hz), 153.2 (d, <sup>1</sup>*J*<sub>CF</sub> = 244 Hz), 152.9, 128.8, 128.2, 127.6, 121.8 (broad), 120.2 (d, <sup>2</sup>*J*<sub>CF</sub> = 11 Hz), 110.6 (d, <sup>4</sup>*J*<sub>CF</sub> = 3 Hz), 102.9 (d, <sup>2</sup>*J*<sub>CF</sub> = 23 Hz), 80.9, 70.7, 28.5. HR-ESIMS: *m/z* 340.1319 [M+Na]<sup>+</sup> (C<sub>18</sub>H<sub>20</sub>FNNaO<sub>3</sub><sup>+</sup>, calculated 340.1319).



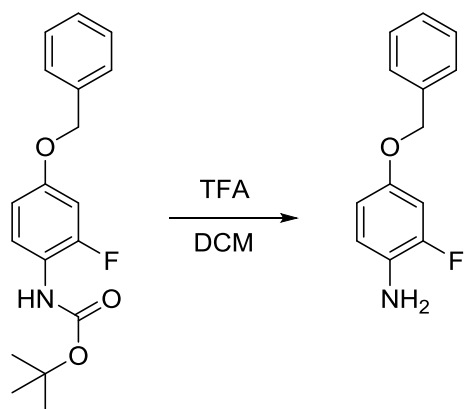

4-(benzyloxy)-2-fluoroaniline. To tert-butyl (4-(benzyloxy)-2-fluorophenyl)carbamate (6.41 g, 20.2 mmol) in DCM (45 ml) on ice was added dropwise trifluoroacetic acid (10 ml, 0.13 mol) and left for 4 hours. The crude was diluted with DCM and washed with aqueous sat.  $K_2CO_3$ . The organic phase was dried over sodium sulfate and evaporated to dryness under reduced pressure yielding the target compound (4.3 g, 19.8 mmol) in 98% as dark brown solids.  $^1H$  NMR (400 MHz, Chloroform-*d*)  $\delta$  7.45 – 7.29 (m, 5H), 6.78 – 6.66 (m, 2H), 6.61 (dd,  $J = 8.7, 2.9$  Hz, 1H), 4.98 (d,  $J = 3.4$  Hz, 2H), 3.41 (s, 2H).  $^{13}C$  NMR (101 MHz,  $CDCl_3$ )  $\delta$  152.07 (d,  $^1J_{CF} = 239$  Hz), 152.05 (d,  $^3J_{CF} = 9$  Hz), 137.1, 128.7, 128.2 (d,  $^2J_{CF} = 13$  Hz), 128.1, 127.6, 117.7 (d,  $^3J_{CF} = 5$  Hz), 111.1 (d,  $^4J_{CF} = 3$  Hz), 104.0 (d,  $^2J_{CF} = 22$  Hz), 71.0  $^{19}F$  NMR (376 MHz, Chloroform-*d*)  $\delta$  -131.81 (dd,  $J = 12.4, 10.1$  Hz). HR-ESIMS:  $m/z$  218.0976  $[M+H]^+$  ( $C_{13}H_{13}FNO^+$ , calculated 218.0976).

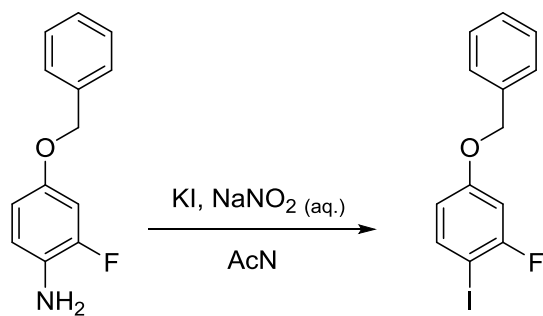

4-(benzyloxy)-2-fluoro-1-iodobenzene To 4-(benzyloxy)-2-fluoroaniline (2.41 g, 11.1 mmol) in MeCN (45 ml) on ice was added dropwise a solution of KI (4.6 g, 27.7 mmol) and  $NaNO_2$  (1.53 g, 22.2 mmol) in water (8 ml). After effervescence had ceased the reaction mixture was allowed to reach room temperature and stirred for 1 hour. The reaction mixture was diluted with DCM and washed with water, 1M sodium thiosulfate and saturated  $NaHCO_3$ . The organic phase was dried over sodium sulfate and evaporated to dryness under reduced pressure. The crude was purified via flash column chromatography (0-20% DCM in hexanes) yielding the target compound (1.45 g, 4.43 mmol) in 40% as pale yellow oil.  $^1H$  NMR (400 MHz, Chloroform-*d*)  $\delta$  7.58 (dd,  $J = 8.7, 7.4$  Hz, 1H), 7.45 – 7.33 (m, 4H), 6.74 (dd,  $J = 9.8, 2.8$  Hz, 1H), 6.60 (ddd,  $J = 8.8, 2.8, 0.8$  Hz, 1H), 5.04 (s, 2H).  $^{19}F$  NMR (377 MHz,

Chloroform-*d*)  $\delta$  -92.05 (dd,  $J = 9.8, 7.3$  Hz)  $^{13}\text{C}$  NMR (101 MHz,  $\text{CDCl}_3$ )  $\delta$  162.4 (d,  $^1J_{\text{CF}} = 245$  Hz), 160.6 (d,  $^3J_{\text{CF}} = 10$  Hz), 139.2 (d,  $^3J_{\text{CF}} = 3$  Hz), 136.1, 128.9, 128.4, 127.6, 113.2 (d,  $^4J_{\text{CF}} = 3$  Hz), 103.4 (d,  $^2J_{\text{CF}} = 27$  Hz), 70.61, 69.9 (d,  $^2J_{\text{CF}} = 26$  Hz)  $^{19}\text{F}$  NMR (376 MHz, Chloroform-*d*)  $\delta$  -131.81 (dd,  $J = 12.4, 10.1$  Hz). HR-ESIMS:  $m/z$  350.9653  $[\text{M}+\text{Na}]^+$  ( $\text{C}_{13}\text{H}_{10}\text{FINaO}^+$ , calculated 350.9653).

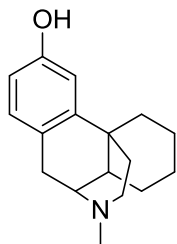

**Dextrorphan.** To dextmethorphan hydrobromide monohydrate (4.6 g, 12.4 mmol) was added 48 % HBr (25 ml) and heated to reflux overnight. The reaction mixture was basified via addition of potassium carbonate and extracted with diethyl ether. The combined organic phases were dried over sodium sulfate affording dextrorphan in 100% (3.2g, 12.4 mmol) as pale green solids. The crude was used in the next step without further purification.  $^1\text{H}$  NMR (400 MHz, Chloroform-*d*)  $\delta$  6.96 (d,  $J = 8.2$  Hz, 1H), 6.71 (d,  $J = 2.6$  Hz, 1H), 6.61 (dd,  $J = 8.2, 2.6$  Hz, 1H), 2.98 (d,  $J = 18.3$  Hz, 1H), 2.91 (dd,  $J = 5.8, 3.1$  Hz, 1H), 2.68 (dd,  $J = 18.3, 5.8$  Hz, 1H), 2.59 – 2.50 (m, 1H), 2.44 (s, 3H), 2.32 – 2.25 (m, 1H), 2.21 (td,  $J = 12.5, 3.3$  Hz, 1H), 1.93 (dt,  $J = 12.8, 3.2$  Hz, 1H), 1.81 (td,  $J = 12.8, 4.7$  Hz, 1H), 1.63 (d,  $J = 11.4$  Hz, 1H), 1.53 – 1.23 (m, 6H), 1.14 (qd,  $J = 12.2, 3.9$  Hz, 1H).  $^{13}\text{C}$  NMR (101 MHz,  $\text{CDCl}_3$ )  $\delta$  155.4, 141.4, 128.9, 128.3, 113.6, 112.3, 58.5, 47.5, 44.5, 42.6, 41.4, 37.1, 36.5, 26.8, 26.5, 23.8, 22.3.

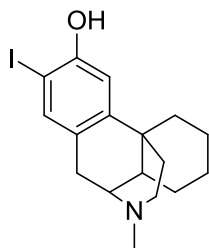

**2-iodo-11-methyl-6,7,8,8a,9,10-hexahydro-5H-9,4b-(epiminoethano)phenanthren-3-ol.** To dextrorphan (1.00g, 3.90 mmol) in MeCN (20 ml) in the dark on ice was added (NIS) (964 mg, 4.29 mmol) and paratoluenesulfonic acid monohydrate (1.48 g, 7.8 mmol) and allowed to reach room temperature and kept overnight. The reaction mixture was diluted with water, 1M  $\text{Na}_2\text{S}_2\text{O}_3$  and basified with  $\text{Na}_2\text{CO}_3$ . The aqueous phase was extracted with DCM and the combined organic phases were dried over sodium sulfate and evaporated to dryness under reduced pressure yielding the target compound as brown solids in 92% (3.6 mmol, 1.38 g). The crude was used in the next step without further purification.  $^1\text{H}$  NMR

(400 MHz, Chloroform-*d*)  $\delta$  7.42 (s, 1H), 6.82 (s, 1H), 5.23 (broad s, 1H), 2.94 (d,  $J = 18.3$  Hz, 1H), 2.85 (dd,  $J = 5.8, 3.2$  Hz, 1H), 2.61 (dd,  $J = 18.4, 5.9$  Hz, 1H), 2.50 (dt,  $J = 12.0, 3.2$  Hz, 1H), 2.41 (s, 3H), 2.30 – 2.21 (m, 1H), 2.13 (td,  $J = 12.4, 3.3$  Hz, 1H), 1.86 (dt,  $J = 12.9, 3.2$  Hz, 1H), 1.76 (td,  $J = 12.8, 4.8$  Hz, 1H), 1.63 (d,  $J = 11.9$  Hz, 1H), 1.49 (d,  $J = 11.6$  Hz, 1H), 1.44 – 1.37 (m, 1H), 1.37 – 1.19 (m, 4tH), 1.09 (qd,  $J = 12.5, 3.9$  Hz, 1H).  $^{13}\text{C}$  NMR (101 MHz,  $\text{CDCl}_3$ )  $\delta$  154.3, 142.9, 137.3, 131.5, 112.4, 83.4, 58.1, 47.3, 44.6, 42.7, 41.6, 37.2, 36.5, 26.8, 26.5, 23.3, 22.3. HR-ESIMS:  $m/z$  384.0820  $[\text{M}+\text{H}]^+$  ( $\text{C}_{17}\text{H}_{23}\text{INO}^+$ , calculated 384.0819).

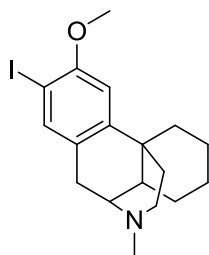

**2-iodo-3-methoxy-11-methyl-6,7,8,8a,9,10-hexahydro-5H-9,4b-**

**(epiminoethano)phenanthrene.** To 2-iodo-11-methyl-6,7,8,8a,9,10-hexahydro-5H-9,4b-(epiminoethano)phenanthren-3-ol. (1.10 g, 2.87 mmol) in MeCN/MeOH (1:1; 35ml) was added DIPEA (1.5 ml, 8.6 mmol) and 2M TMS-diazomethane in ether (2.87 ml, 5.74 mmol) and left overnight. The reaction mixture was diluted with water and extracted with DCM. The combined organic phases were washed with brine and dried over sodium sulphate. The crude was purified via flash column chromatography using 8-22% MeOH in DCM affording the target compound as beige solids in 42% (480mg, 1.21 mmol).  $^1\text{H}$  NMR (400 MHz, Methanol- $d_4$ )  $\delta$  7.59 (s, 1H), 6.83 (s, 1H), 3.82 (s, 3H), 3.20 (dd,  $J = 6.0, 3.1$  Hz, 1H), 3.07 (d,  $J = 19.1$  Hz, 1H), 2.87 (dd,  $J = 19.1, 6.0$  Hz, 1H), 2.78 (dd,  $J = 12.0, 3.0$  Hz, 1H), 2.64 (s, 3H), 2.53 – 2.46 (m, 1H), 2.39 (td,  $J = 12.9, 3.5$  Hz, 1H), 1.95 (dt,  $J = 12.7, 3.4$  Hz, 1H), 1.84 (td,  $J = 13.3, 4.7$  Hz, 1H), 1.73 – 1.65 (m, 1H), 1.63 – 1.55 (m, 1H), 1.50 (ddd,  $J = 13.5, 3.5, 1.7$  Hz, 2H), 1.41 (ddt,  $J = 16.6, 13.7, 3.6$  Hz, 2H), 1.29 (tt,  $J = 13.3, 3.1$  Hz, 1H), 1.18 – 1.06 (m, 1H).  $^{13}\text{C}$  NMR (101 MHz, MeOD)  $\delta$  159.0, 141.7, 139.8, 131.2, 109.2, 84.5, 60.3, 56.9, 48.4, 44.6, 42.0, 41.0, 37.9, 36.8, 27.4, 27.2, 24.4, 23.1. HR-ESIMS:  $m/z$  398.0975  $[\text{M}+\text{H}]^+$  ( $\text{C}_{18}\text{H}_{25}\text{INO}^+$ , calculated 398.0975).

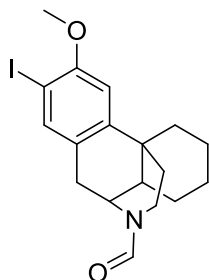

**2-iodo-3-methoxy-6,7,8,8a,9,10-hexahydro-5H-9,4b-(epiminoethano)phenanthrene-11-carbaldehyde.** To **2-iodo-3-methoxy-11-methyl-6,7,8,8a,9,10-hexahydro-5H-9,4b-(epiminoethano)phenanthrene** (80 mg, 0.20 mmol) in MeCN (1 ml) was added DIAD (59  $\mu$ l, 0.30 mmol) and heated at 80 degrees for 1 hour. The solvent was removed under reduced pressure. The crude was dissolved in 2M HCl in dioxane/water (1:1; 4ml) and refluxed for 2 hours. The reaction mixture was basified with 2M NaOH and extracted with DCM. The combined organic phases were dried over sodium sulfate and evaporated to dryness under reduced pressure. To the crude on ice in THF (1 ml) was added freshly prepared acetic formic anhydride (formic acid (95  $\mu$ l, 2.5 mmol) and acetic anhydride (190  $\mu$ l, 2.0 mmol) heated at 65 °C for 30 minutes) and stirred for 10 minutes. The solvents were removed under reduced pressure and the crude purified via flash column chromatography 50% EtOAc in hexanes affording the product as off white solids in 57% (47 mg, 0.11 mmol) over 3 steps. NMR show a mixture of rotary isomers in roughly 1:1 ratio.  $^1\text{H}$  NMR (400 MHz, Chloroform-*d*)  $\delta$  (8.13, 7.98) (s, 1H), (7.52, 7.50) (s, 1H), (4.65 – 4.56, 3.69 – 3.65) (m, 1H), 3.85 (s, 1H), (3.28, 3.14), (td,  $J$  = 18.1, 5.9 Hz, 1H), 3.14 (td,  $J$  = 18.1, 5.9 Hz, 1H), (2.95, 2.45) (td,  $J$  = 13.2, 3.9 Hz, 1H), 2.63 (t,  $J$  = 18.9 Hz, 1H). 2.40 – 2.30 (m, 1H), 1.71 – 1.46 (m, 5H), 1.39 – 1.21 (m, 4H), 1.13 – 1.03 (m, 1H).  $^{13}\text{C}$  NMR (101 MHz,  $\text{CDCl}_3$ )  $\delta$  160.8, 160.7, 157.5, 157.4, 140.8, 140.7, 139.0, 138.9, 130.7, 130.1, 108.2, 108.2, 83.9, 83.9, 56.6, 56.6, 53.6, 46.2, 45.0, 43.7, 42.0, 41.1, 40.8, 39.2, 39.0, 36.7, 36.6, 34.9, 32.0, 30.7, 26.4, 26.2, 26.2, 22.0, 22.0, 21.8. HR-ESIMS:  $m/z$  434.0587 [ $\text{M}+\text{Na}$ ] $^+$  ( $\text{C}_{18}\text{H}_{22}\text{INNaO}_2^+$ , calculated 434.0587).

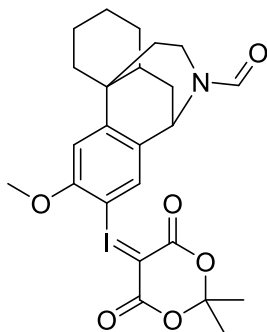

**7-((2,2-dimethyl-4,6-dioxo-1,3-dioxan-5-ylidene)-13-iodaneryl)-6-methoxy-1,3,4,9,10,10a-hexahydro-2H-9,4a-(epiminoethano)phenanthrene-11-carbaldehyde.** To **2-iodo-3-methoxy-6,7,8,8a,9,10-hexahydro-5H-9,4b-(epiminoethano)phenanthrene-11-carbaldehyde** (36 mg, 0.09 mmol) was added 77% mCPBA (31 mg, 0.14 mmol) in DCM (1 ml) and heated to 38 degrees for 80 minutes. The reaction mixture was cooled to 10 degrees and KOH (56 mg, 10 mmol) together with 2,2-dimethyl-1,3-dioxane-4,6-dione (19 mg, 0.13 mmol) was added in one portion. The reaction mixture was kept between 10 and 15 degrees for 40 minutes. The reaction mixture was diluted with DCM (5 ml), filtered through a filter paper, washed with DCM (5 ml) and dried over sodium sulfate. The drying agent was filtered off and solvent removed under reduced pressure at 20-22 °C. The crude was dissolved in DCM (~5ml) and filtered

through a filter paper. The crude was purified via precipitation from slow addition of hexanes (10 ml). The flask was left at -20 for 1 hour. The product was obtained as white solids in 22% (11 mg, 0.020 mmol) via filtration and washed with hexanes. NMR was recorded as a mixture of rotary isomers in ~1:1 ratio.  $^1\text{H}$  NMR (400 MHz,  $\text{CDCl}_3$ )  $\delta$  8.09 (s, 0.5 H), 7.93 (s, 0.5H), 7.28 (s, 1H), 7.09 (s, 0.5H), 4.44 (dd,  $J = 4.9, 3.1$  Hz, 0.5H), 3.98 ( $J =$  dd, 13.8, 5.1 Hz, 0.5H), 3.91 (s, 3H), 3.85 (dd,  $J = 5.5, 3.5$  Hz, 0.5H), 3.41 (dd,  $J = 13.6, 5.1$  Hz, 0.5H), 3.11 (td,  $J = 18.3, 6.0$  Hz, 1H), 2.67 – 2.61 (m, 1H), 2.55 – 2.53 (m, 0.5H), 2.16 (td,  $J = 13.2, 4.2$  Hz, 0.5H), 1.68 – 1.65 (m, 0.5H), 1.61 – 1.39 (m, 12.5H), 1.36 – 1.28 (m, 2H), 1.14 – 1.07 (m, 1H), 0.90 (tdd,  $J = 12.9, 8.9, 4.1$  Hz, 1H).  $^{13}\text{C}$  NMR (151 MHz, DMSO)  $\delta$  162.6, 160.7, 160.5, 155.1, 144.2, 131.42, (131.35, 131.3), (109.82, 109.78), 102.8, (102.6, 102.5), 57.1, (54.40, 54.35), (51.7, 45.0), (43.9, 42.8), (41.0, 40.1), (38.93, 38.89), (35.6, 35.5), (33.9, 31.9), (30.5, 21.7), (25.9, 25.8), 25.57, (25.52, 25.48). HR-ESIMS:  $m/z$  576.0853  $[\text{M}+\text{Na}]^+$  ( $\text{C}_{24}\text{H}_{28}\text{INaO}_6^+$ , calculated 576.0854).

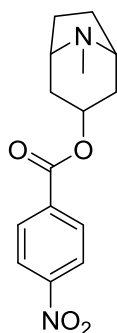

**8-methyl-8-azabicyclo[3.2.1]octan-3-yl 4-nitrobenzoate.** To Tropine (282 mg, 2.0 mmol) in PhMe (3 ml) was added triethylamine (307  $\mu\text{l}$ , 2.2 mmol) and heated to reflux. 4-nitrobenzoyl chloride (408 mg, 2.2 mmol) was added in one portion and the reaction mixture heated at reflux for 3 hours. The crude was diluted with  $\text{CHCl}_3$  and washed with sat.  $\text{NaHCO}_3$ . The organic phase was dried over sodium sulphate and evaporated to dryness under reduced pressure. The crude was purified via flash column chromatography (8-25% MeOH in DCM) affording the target compound (122 mg, 0.42 mmol) as pale yellow solids in 21%.  $^1\text{H}$  NMR (400 MHz, Chloroform- $d$ )  $\delta$  8.35 – 8.29 (m, 2H), 8.21 – 8.17 (m, 2H), 5.31 (t,  $J = 5.3$  Hz, 1H), 3.21 (s, 2H), 2.34 (s, 3H), 2.29 (d,  $J = 15.6$  Hz, 2H), 2.18 – 2.10 (m, 2H), 2.06 – 1.97 (m, 2H), 1.87 (d,  $J = 15.1$  Hz, 2H).  $^{13}\text{C}$  NMR (101 MHz,  $\text{CDCl}_3$ )  $\delta$  164.1, 150.7, 136.3, 130.7, 123.8, 69.6, 59.9, 40.6, 36.8, 26.0. HR-ESIMS:  $m/z$  291.1339  $[\text{M}+\text{H}]^+$  ( $\text{C}_{15}\text{H}_{19}\text{N}_2\text{O}_4^+$ , calculated 291.1339).

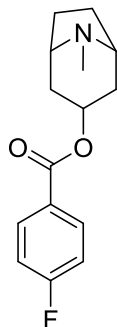

**8-methyl-8-azabicyclo[3.2.1]octan-3-yl 4-fluorobenzoate.** To Tropine (282 mg, 2.0 mmol) in PhMe (2 ml) at reflux was added 4-iodobenzoyl chloride (260  $\mu$ l, 2.2 mmol) and kept for 5.5 hours. The crude was diluted with DCM, washed with sat. NaHCO<sub>3</sub> and brine. The solvents were removed under reduced pressure and the crude purified via flash column chromatography (0-25% MeOH in DCM) affording the target compound (212 mg, 0.81 mmol) as white solids in 40%. <sup>1</sup>H NMR (400 MHz, Chloroform-*d*)  $\delta$  8.05 – 7.96 (m, 2H), 7.18 – 7.09 (m, 2H), 5.33 (t, *J* = 5.2 Hz, 1H), 3.51 (s, 2H), 2.71 (s, 2H), 2.57 (s, 3H), 2.25 (s, 4H), 2.00 (d, *J* = 15.5 Hz, 2H). <sup>19</sup>F NMR (377 MHz, Chloroform-*d*)  $\delta$  -105.1 (s).

## NMR reactions screening

### Typical procedure

To iodonium ylide (5  $\mu$ mol) was added reference compound 4-fluorobiphenyl (0.50 mg, 2.3  $\mu$ mol), KF/crypt-222/K<sub>2</sub>CO<sub>3</sub> (10  $\mu$ mol KF) and DMF (0.5 ml). The reaction mixture was purged with argon for 1 minute and heated at 130 °C for 20 minutes. The reaction mixture was analysed via <sup>19</sup>F-NMR, spiked with reference compound and reanalysed again to confirm signal assignment.

### NMR analysis

The acquired FID file was opened in MestReNova V11.0.04, the spectra was phase adjusted to fit the reference compound and baseline corrected via Whittaker Smoother. The reference signal was integrated and noted down. The product signal was now phase adjusted and the signal integrated. The integrals were compared with added quantities to the reaction mixtures and a yield was calculated.

### Radiochemistry

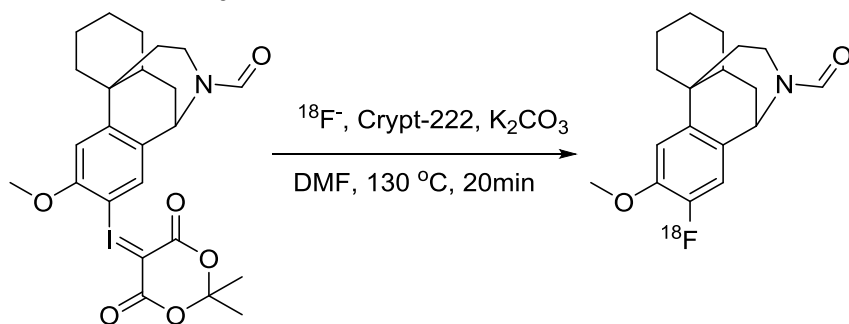

Aqueous target mixtures containing  $^{18}\text{F}^-$  ( $\sim 500$  MBq) was loaded onto a QMA cartridge and subsequently eluted with crypt-222 (5 mg, 13  $\mu\text{mol}$ ) and  $\text{K}_2\text{CO}_3$  (0.92 mg, 5.6  $\mu\text{mol}$ ) in 30/70 water/acetonitrile (0.5 ml) into a V-vial. The vial was heated at 85°C under a stream of nitrogen. After evaporation of bulk solvents, MeCN (1 ml) was added. The process was repeated 2 consecutive times. The vials content (400 MBq) was dissolved in DMF (200  $\mu\text{l}$ ). Iodonium ylide (2.04 mg, 3.7  $\mu\text{mol}$ ) was added from DMF (0.3 ml). The capped V-vial was bubbled with nitrogen for 1 minute and heated in a heating block at 130 °C for 20 minutes. The reaction mixture was allowed to cool to room temperature and a sample was taken for radioTLC analysis. The reaction mixture was diluted with water (7 ml), passed through a C18 cartridge (HR-P Chromafix) washed with water (10 ml) and eluted with DCM/THF (4:1; 5 ml) through a Si cartridge. RadioTLC was used to determine radiochemical purity, yielding the radiotracer in 38% RCY (150 MBq, > 95% RCP).

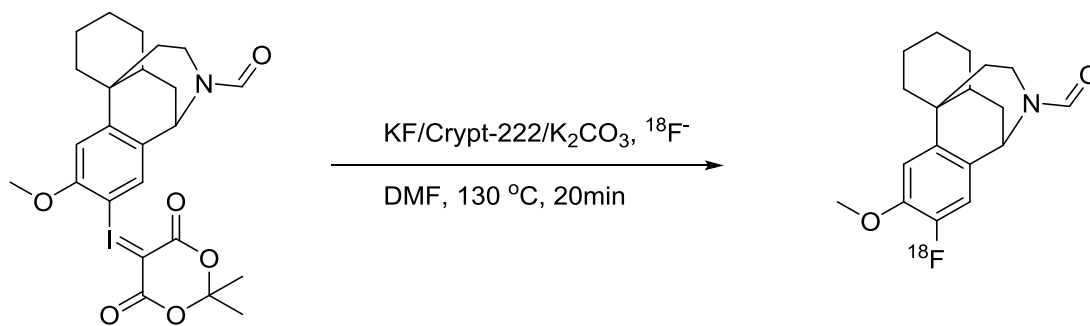

Aqueous target mixtures containing  $^{18}\text{F}^-$  ( $\sim 500$  MBq) was loaded onto a QMA cartridge and subsequently eluted with crypt-222 (1 mg, 2.6  $\mu\text{mol}$ ) and  $\text{K}_2\text{CO}_3$  (0.09 mg, 0.56  $\mu\text{mol}$ ) in 30/70 water/acetonitrile (0.5 ml) into a V-vial. The vial was heated at 85°C under a stream of nitrogen. After evaporation of bulk solvents, MeCN (1 ml) was added. The process was repeated 2 consecutive times. The vials content was dissolved in DMF (500  $\mu\text{l}$ ) and a portion (100  $\mu\text{l}$ ) was added to crypt-222/KF/ $\text{K}_2\text{CO}_3$  (4:3:1, 5.65 mg, 8.6  $\mu\text{mol}$ ). Iodonium ylide (2.07 mg, 3.7  $\mu\text{mol}$ ) was added from DMF (0.3 ml). The capped V-vial was bubbled with nitrogen for 1 minute and heated in a heating block at 130 °C for 20 minutes. The reaction mixture was allowed to cool to room temperature and a sample was taken for radioTLC analysis. The reaction mixture was diluted with water (7 ml), passed through a C18 cartridge (HR-P Chromafix) washed with water (10 ml) and eluted with DCM/THF (4:1; 5 ml) through a Si cartridge. RadioTLC was used to determine radiochemical purity (> 95% RCP). Isolated yield was calculated after decay correction.

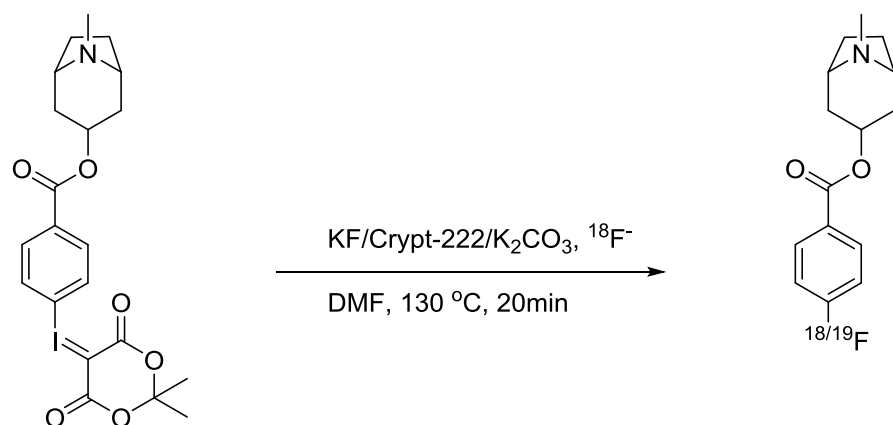

Aqueous target mixtures containing  ${}^{18}\text{F}^-$  ( $\sim 500$  MBq) was loaded onto a QMA cartridge and subsequently eluted with crypt-222 (1 mg, 2.6  $\mu\text{mol}$ ) and  $\text{K}_2\text{CO}_3$  (0.09 mg, 0.56  $\mu\text{mol}$ ) in 30/70 water/acetonitrile (0.5 ml) into a V-vial. The vial was heated at 85 $^\circ\text{C}$  under a stream of nitrogen. After evaporation of bulk solvents, MeCN (1 ml) was added. The process was repeated 2 consecutive times. The vials content was dissolved in DMF (500  $\mu\text{l}$ ) and a portion (100  $\mu\text{l}$ ) was added to crypt-222/KF/ $\text{K}_2\text{CO}_3$  (4:3:1, 5.90 mg, 8.9  $\mu\text{mol}$ ). Iodonium ylide (2.74 mg, 5.3  $\mu\text{mol}$ ) was added from DMF (0.3 ml). The capped V-vial was bubbled with nitrogen for 1 minute and heated in a heating block at 130  $^\circ\text{C}$  for 20 minutes. The reaction mixture was allowed to cool to room temperature and a sample was taken for radioTLC analysis. The reaction mixture was diluted with water (7 ml), passed through a  $\text{C}_{18}$  cartridge (HR-P Chromafix) washed with water (10 ml) and eluted with DCM/THF (4:1; 5 ml) through a Si cartridge. RadioTLC was used to determine radiochemical purity (> 95% RCP). Isolated yield was calculated after decay correction.



## Additional experiments

Fluorination experiments were performed in accordance to typical procedure with the indicated variations, yield are  $^{19}\text{F}$  NMR yields using 4-fluorobiphenyl as internal reference.

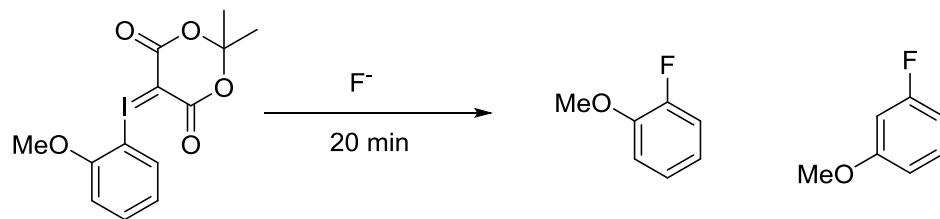

### 4F anisole

26%  
21%  
37%  
33%  
32±1%  
2%

### 3F anisole

0.8%  
0.8%  
0.9%  
1.4%  
1±0.2%  
0

### Conditions

2 eq TBAF 4\*tBuOH  
2 eq TBAF 4\*tBuOH  
2 eq TBAF 4\*tBuOH  
2 eq TBAF 4\*tBuOH  
1.5 eq TBAF 4\*tBuOH  
1 eq Crypt-222, 4 eq KF

### Temperature

110 °C  
120 °C  
140 °C  
130 °C m.w. heating  
130 °C  
130 °C

### 4F anisole

56%  
34%  
36%  
46%  
58%

### 3F anisole

0%  
0%  
0%  
0%  
0%

### Conditions

2 eq Crypt-222/K<sub>2</sub>CO<sub>3</sub>/KF, 130°C  
2 eq Crypt-222/K<sub>2</sub>CO<sub>3</sub>/KF, 130°C  
2 eq Crypt-222/K<sub>2</sub>CO<sub>3</sub>/KF, 130°C  
2 eq Crypt-222/K<sub>2</sub>CO<sub>3</sub>/KF, 130°C  
2 eq Crypt-222/K<sub>2</sub>CO<sub>3</sub>/KF, 130°C

### Additive

+20% PPh<sub>3</sub>  
+10% PPh<sub>3</sub>  
+100% PPh<sub>3</sub>  
+5% PPh<sub>3</sub>  
+1% PPh<sub>3</sub>

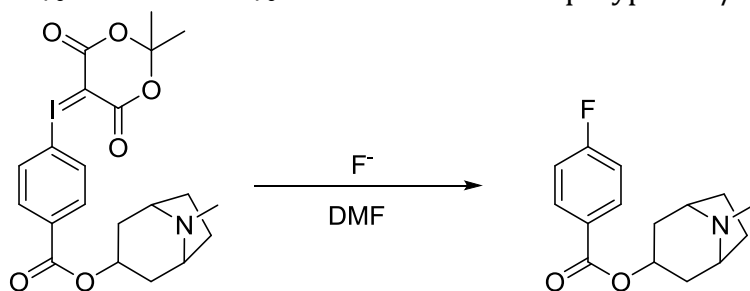

### $^{19}\text{F}$ NMR yield

33 %

### Conditions

2 eq  
222/K<sub>2</sub>CO<sub>3</sub>/KF

### Temperature

Crypt-  
r.t.

### Time

60 min

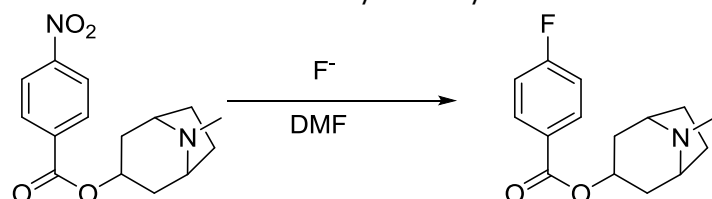

| <b><sup>19</sup>F NMR yield</b> | <b>Conditions</b>                                 | <b>Temperature</b> | <b>Time</b> |
|---------------------------------|---------------------------------------------------|--------------------|-------------|
| traces                          | 2 eq Crypt-222/K <sub>2</sub> CO <sub>3</sub> /KF | r.t.               | 60 min      |
| traces                          | 2 eq TBAF*4tBuOH                                  | r.t.               | 60 min      |
| 25 %                            | 2 eq TBAF*4tBuOH                                  | 130 degrees        | 20 min      |
| 34 %                            | 2 eq Crypt-222/K <sub>2</sub> CO <sub>3</sub> /KF | 130 degrees        | 20 min      |

## Solubility experiments

To solid reagents and a magnetic stirrer bar was added DMF (0.5 ml). The mixture was stirred for 30 seconds. Solubility was visually evaluated. The samples were heated for 10 + 10 + 100 minutes at 130 degrees, evaluated visually and after 2 hours by  $^{13}\text{C}$ -NMR after diluting with  $\text{CDCl}_3$  (1/5 volume).

### Solubility of fluorinating reagent (Dissolved (yes/no))

| Reagents added                                                                           | r.t. | 10 min 130°C | 20 min 130°C | 2 h 130°C |
|------------------------------------------------------------------------------------------|------|--------------|--------------|-----------|
| 4:3:1 : K222:KF:K2CO3 pre-complex (10 $\mu\text{mol}$ with respect to KF                 | yes  | yes          | yes          | yes       |
| KF (10 $\mu\text{mol}$ ), Crypt-222 (12.5 $\mu\text{mol}$ ) K2CO3 (2.5 $\mu\text{mol}$ ) | no   | no           | no           | no        |
| KF (10 $\mu\text{mol}$ ). Crypt-222 (12.5 $\mu\text{mol}$ )                              | no   | no           | no           | no        |
| KF (10 $\mu\text{mol}$ )                                                                 | no   | no           | no           | no        |

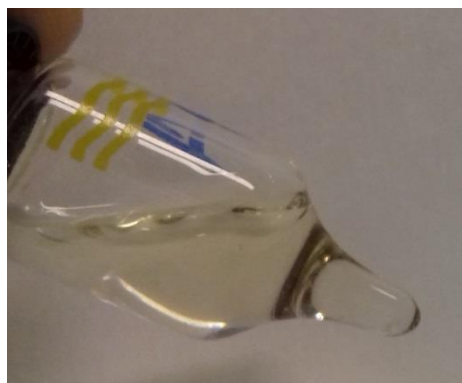

Figure 2: 4:3:1 : K222:KF:K2CO3 pre-complex (10  $\mu\text{mol}$  with respect to KF (no visible solids after 2 hours)

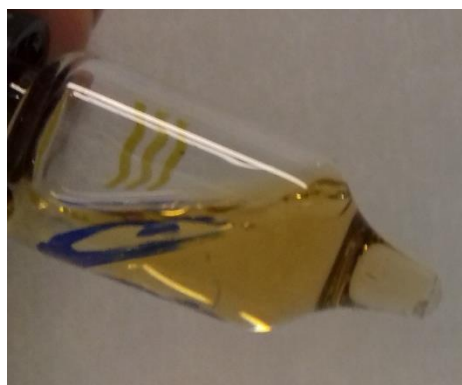

Figure 3: KF (10  $\mu\text{mol}$ ), Crypt-222 (12.5  $\mu\text{mol}$ ) K2CO3 (2.5  $\mu\text{mol}$ ) (visible solids in bottom after 2 hours)

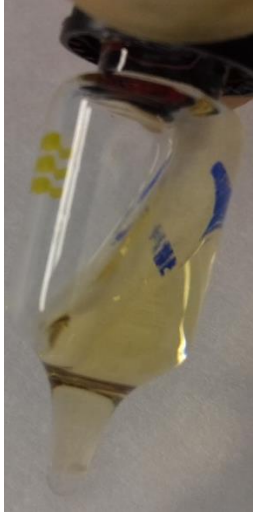

Figure 4: KF (10  $\mu\text{mol}$ ). Crypt-222 (12.5  $\mu\text{mol}$ ) (visible solids in bottom after 2 hours)

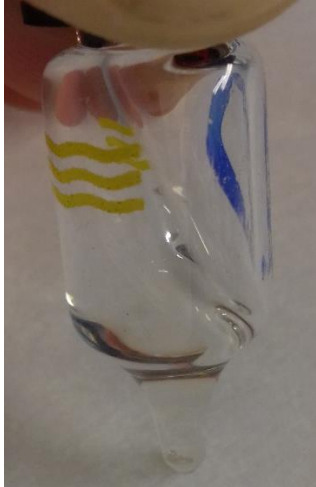

Figure 5: KF (10  $\mu\text{mol}$ ) (visible solids in bottom after 2 hours)

# NMR

Premade Crypt-222/KF/K<sub>2</sub>CO<sub>3</sub> (4:3:1) complex in DMF/CDCl<sub>3</sub> (5:1) after 2 hour heating at 130°C

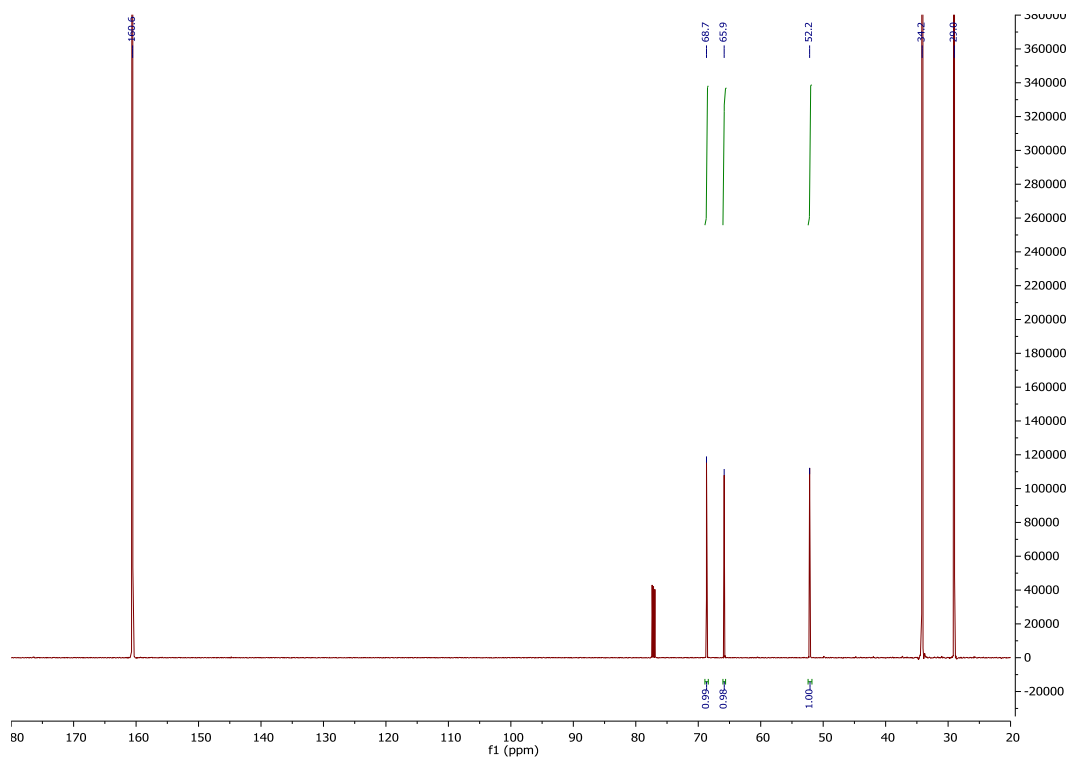

Crypt-222 (12.5 μmol), KF (10 μmol) and K<sub>2</sub>CO<sub>3</sub> (2.5 μmol) in DMF/CDCl<sub>3</sub> (5:1) after 2 hour heating at 130°C

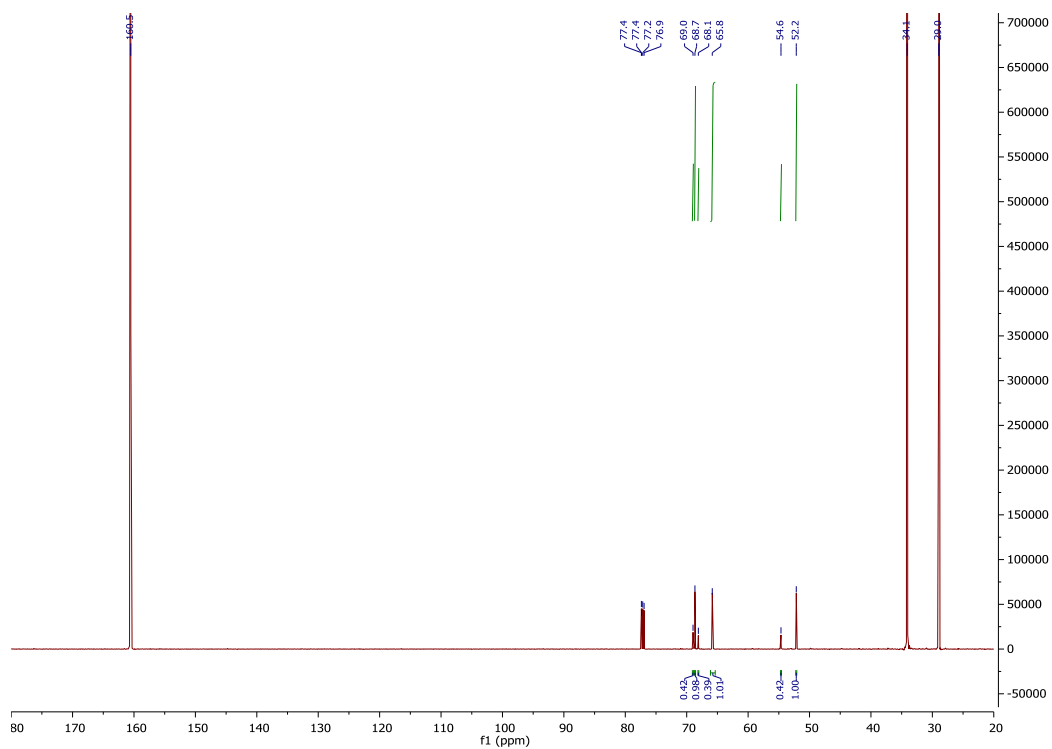

Crypt-222 in DMF/CDCl<sub>3</sub> (5:1)

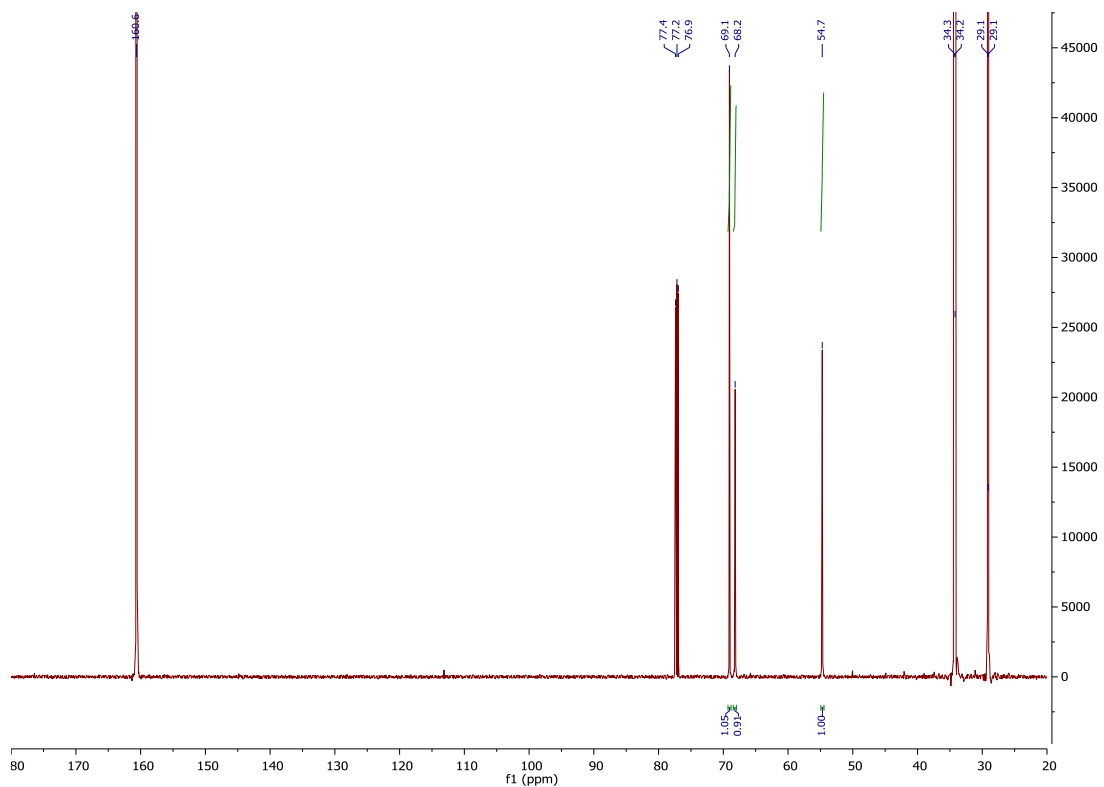

Crypt-222 (12.5  $\mu$ mol) and KF (10  $\mu$ mol) in DMF/CDCl<sub>3</sub> (5:1) after 2 hour heating at 130°C

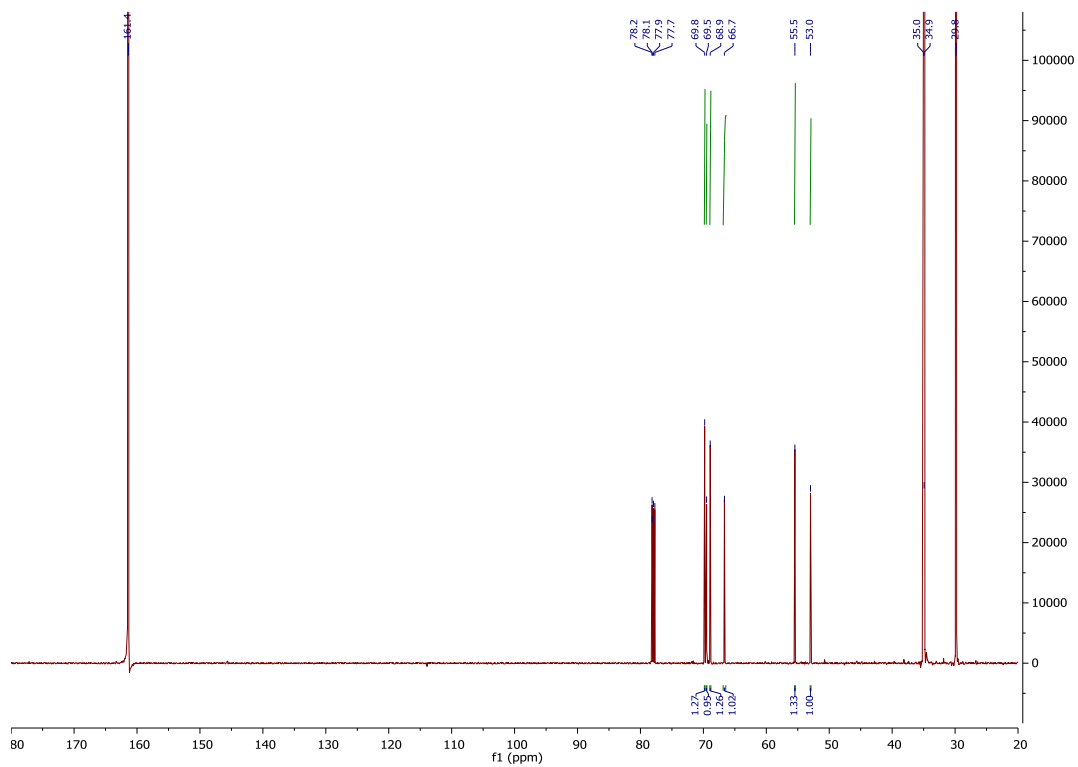

# 11-methyl-6,7,8,8a,9,10-hexahydro-5H-9,4b-(epiminoethano)phenanthren-3-ol

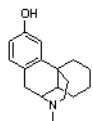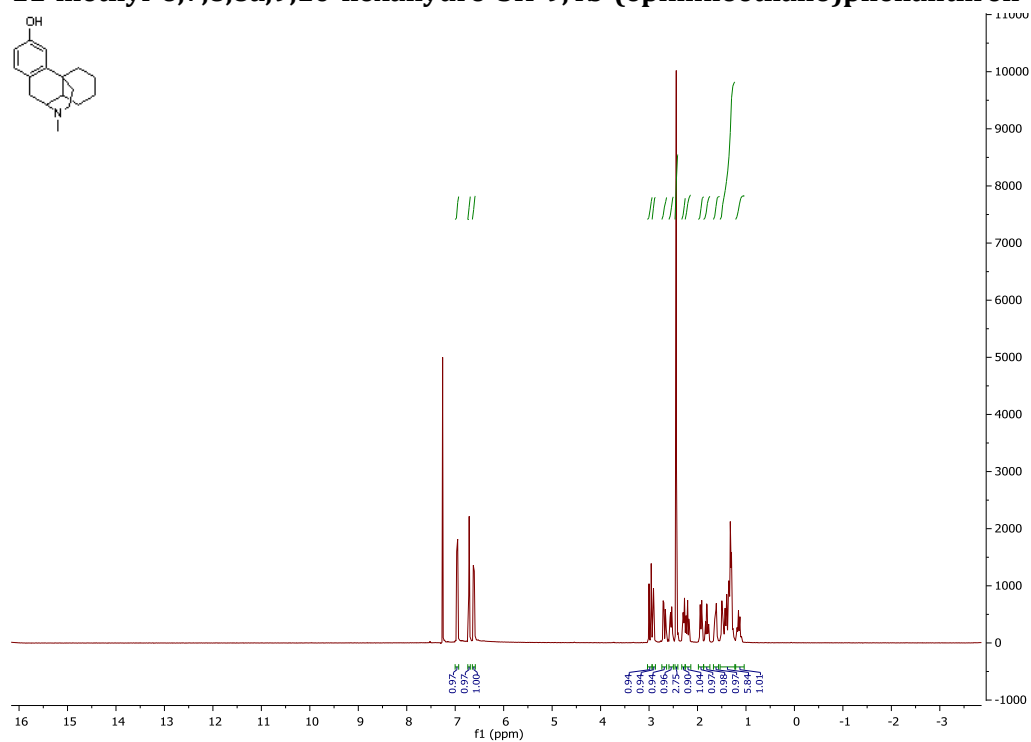

# 11-methyl-6,7,8,8a,9,10-hexahydro-5H-9,4b-(epiminoethano)phenanthren-3-ol

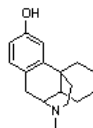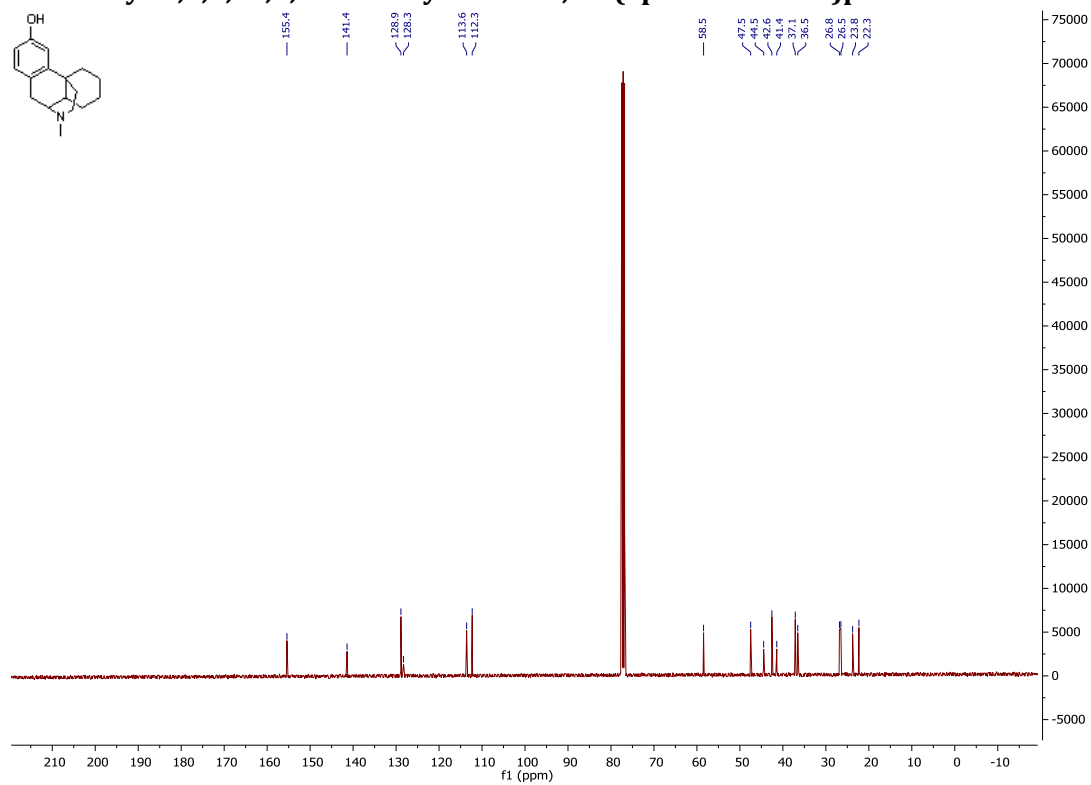

### 2-iodo-11-methyl-6,7,8,8a,9,10-hexahydro-5H-9,4b-(epiminoethano)phenanthren-3-ol

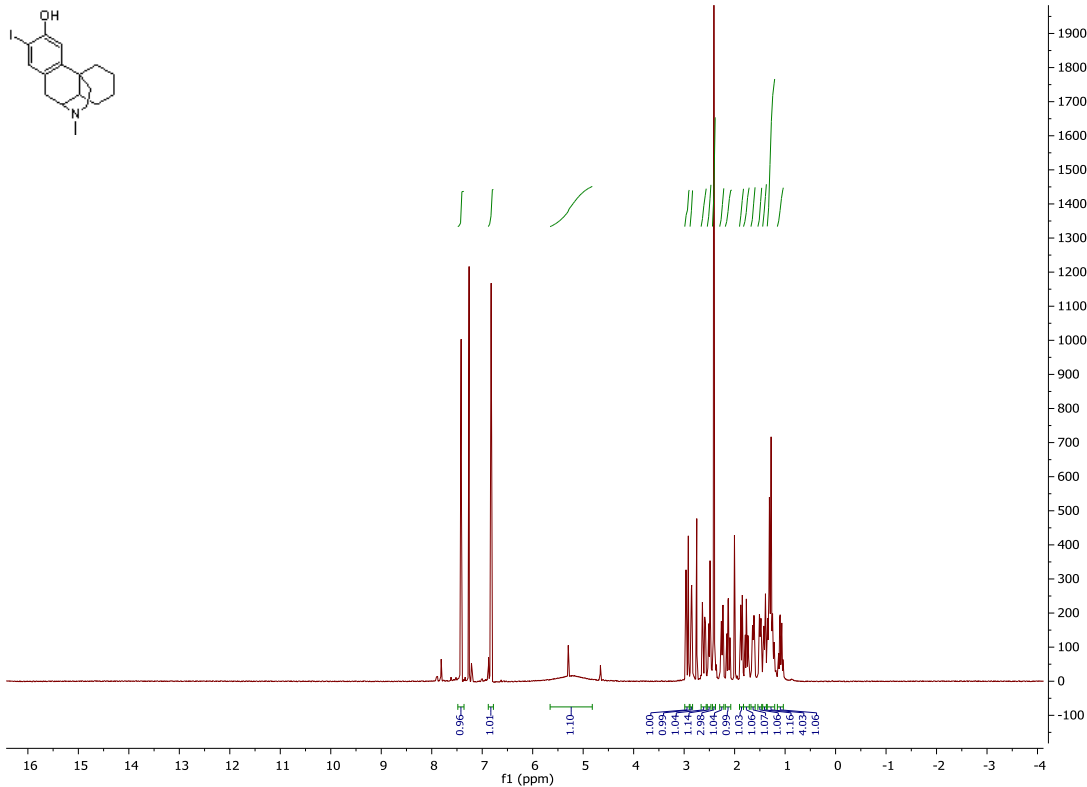

### 2-iodo-11-methyl-6,7,8,8a,9,10-hexahydro-5H-9,4b-(epiminoethano)phenanthren-3-ol

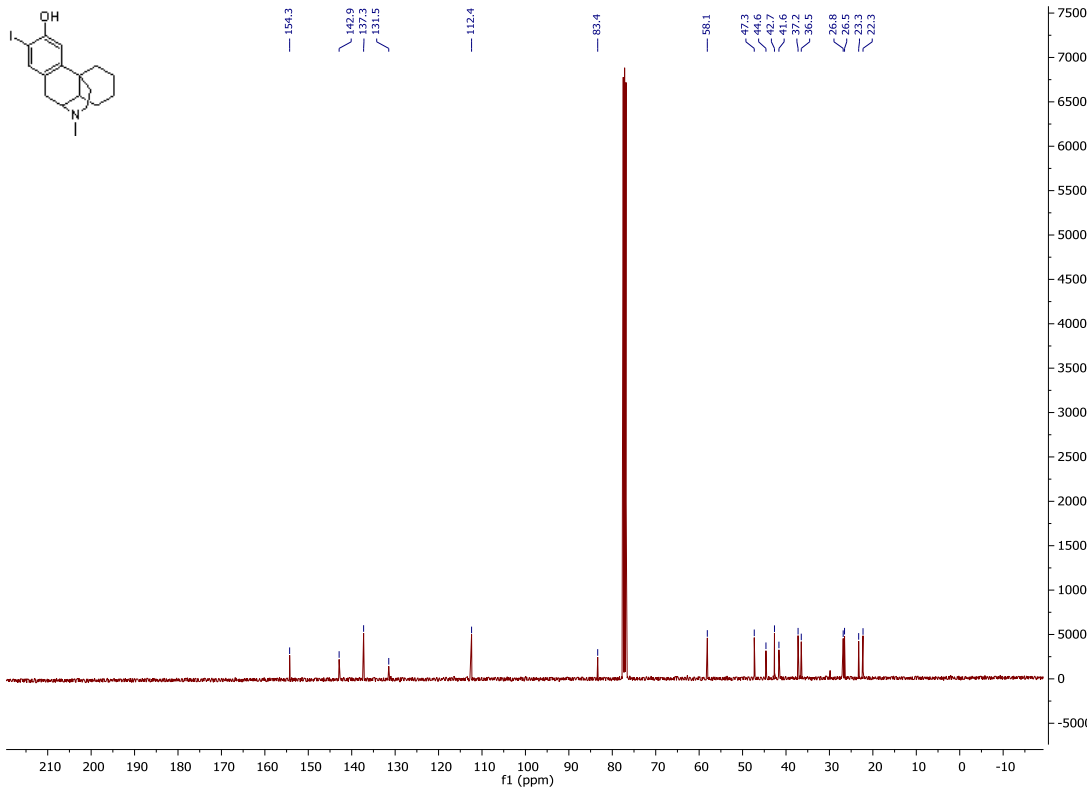



**2-iodo-3-methoxy-11-methyl-6,7,8,8a,9,10-hexahydro-5H-9,4b-(epiminoethano)phenanthrene**

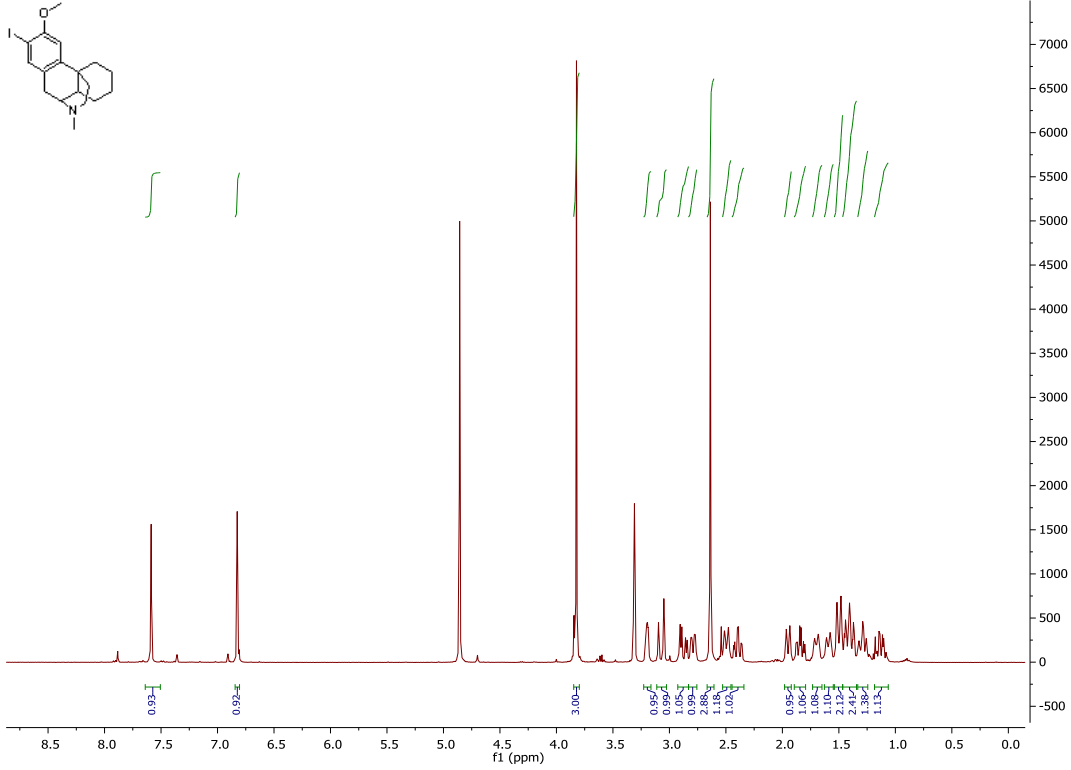

**2-iodo-3-methoxy-11-methyl-6,7,8,8a,9,10-hexahydro-5H-9,4b-(epiminoethano)phenanthrene**

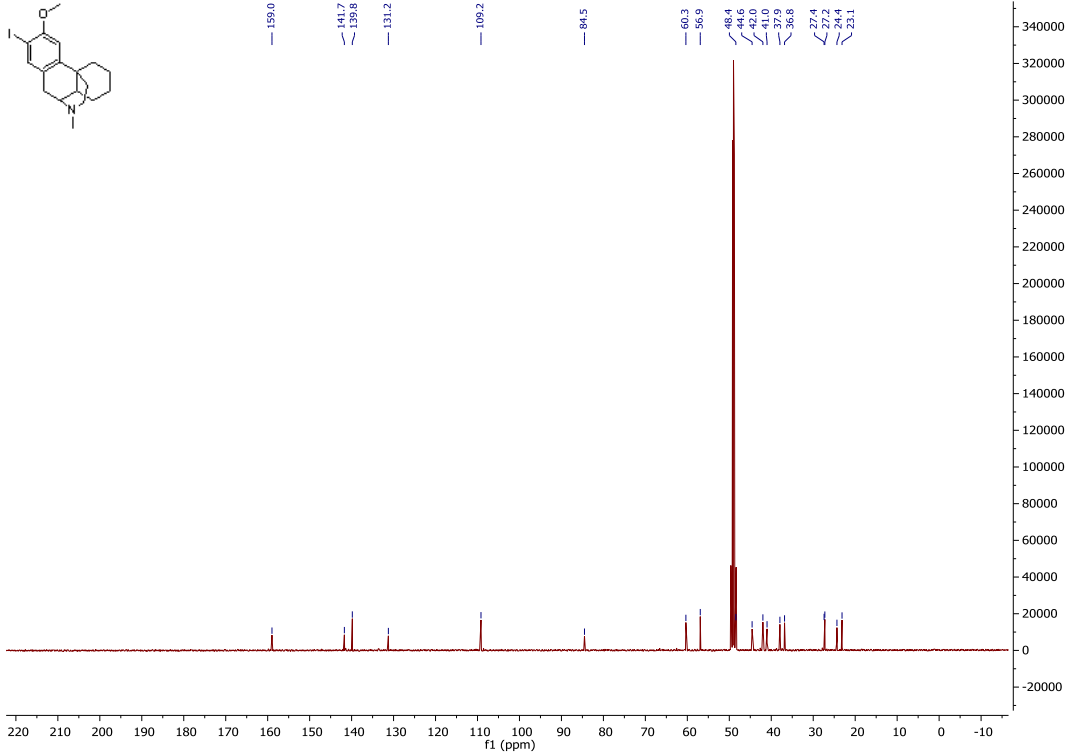

**2-iodo-3-methoxy-6,7,8,8a,9,10-hexahydro-5H-9,4b-(epiminoethano)phenanthrene-11-carbaldehyde**

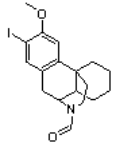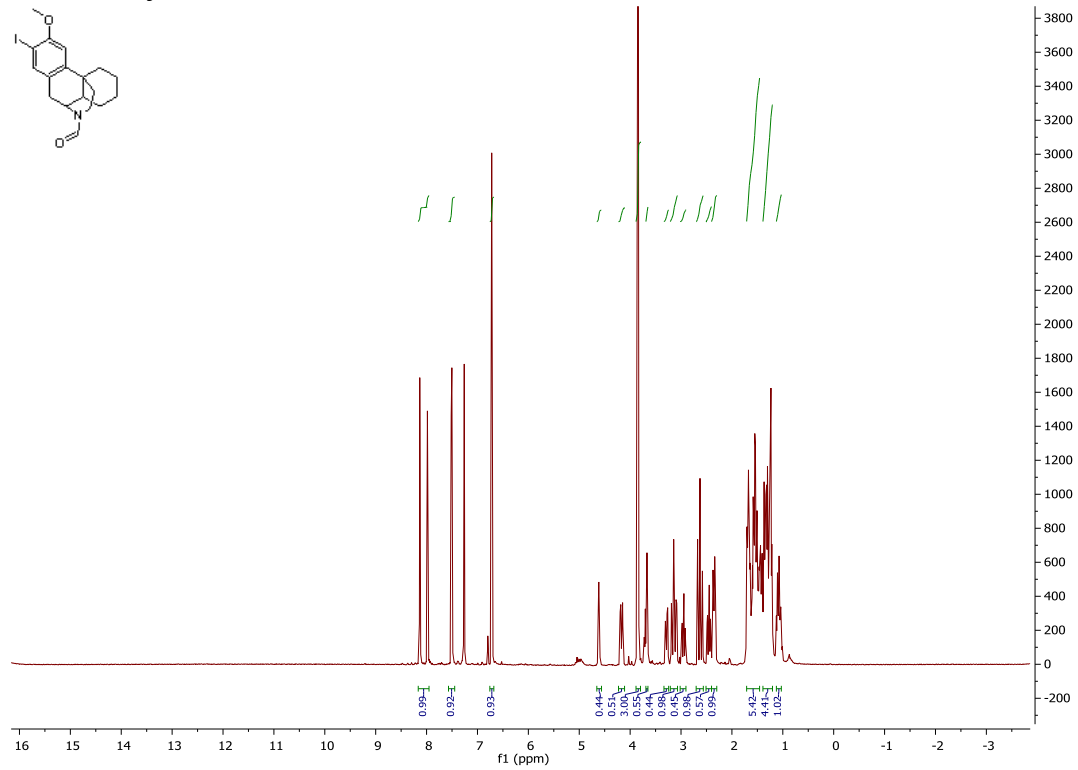

**2-iodo-3-methoxy-6,7,8,8a,9,10-hexahydro-5H-9,4b-(epiminoethano)phenanthrene-11-carbaldehyde**

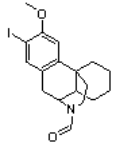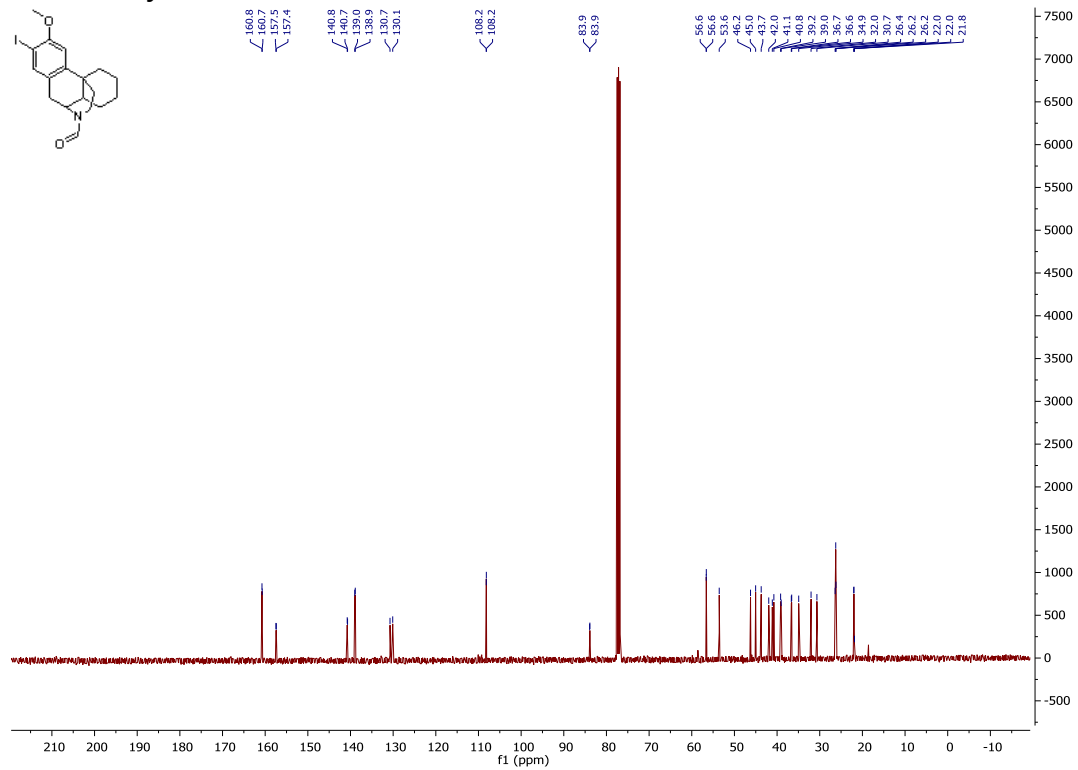

**Original sample of 5-((4-chlorophenyl)-13-iodaneylidene)-2,2-dimethyl-1,3-dioxane-4,6-dione.**

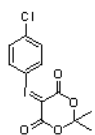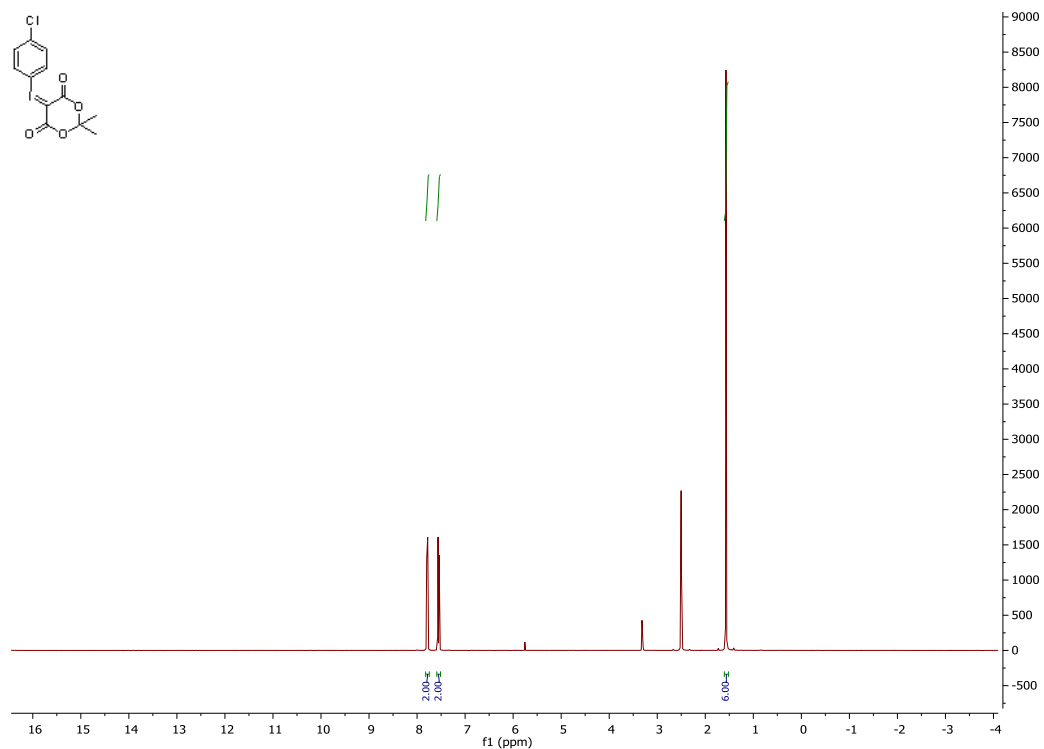

**Sample of 5-((4-chlorophenyl)-13-iodaneylidene)-2,2-dimethyl-1,3-dioxane-4,6-dione after 6 months in freezer.**

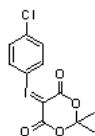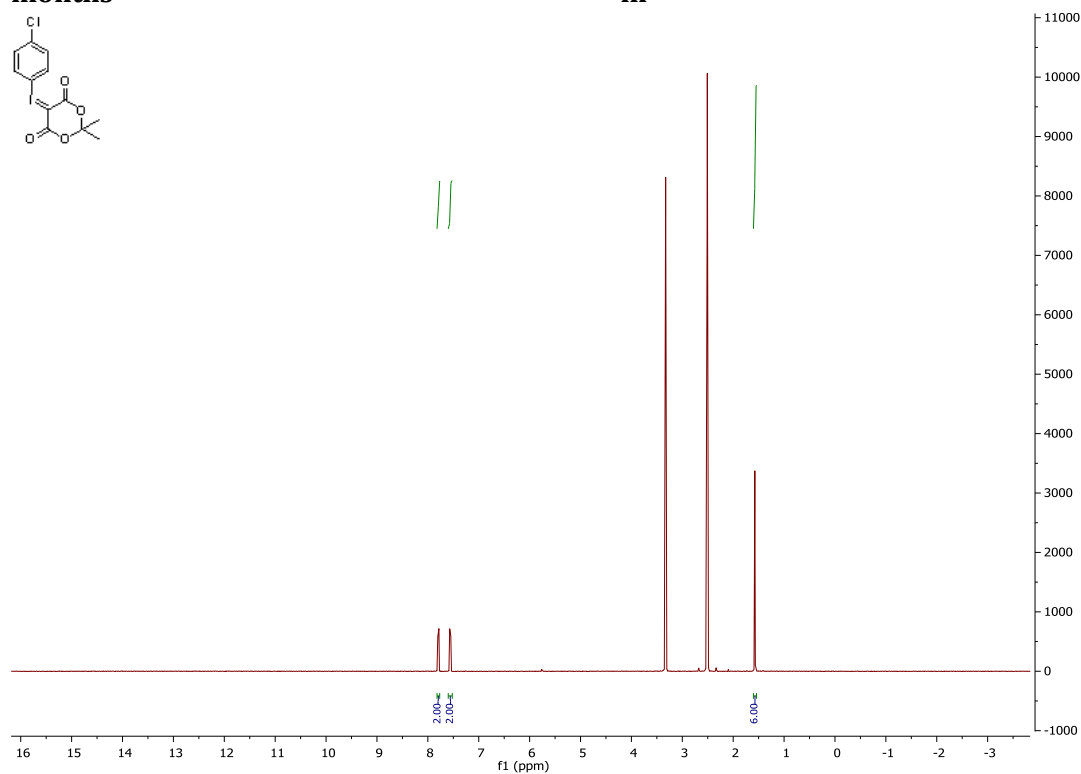

### 8-methyl-8-azabicyclo[3.2.1]octan-3-yl

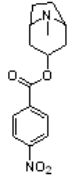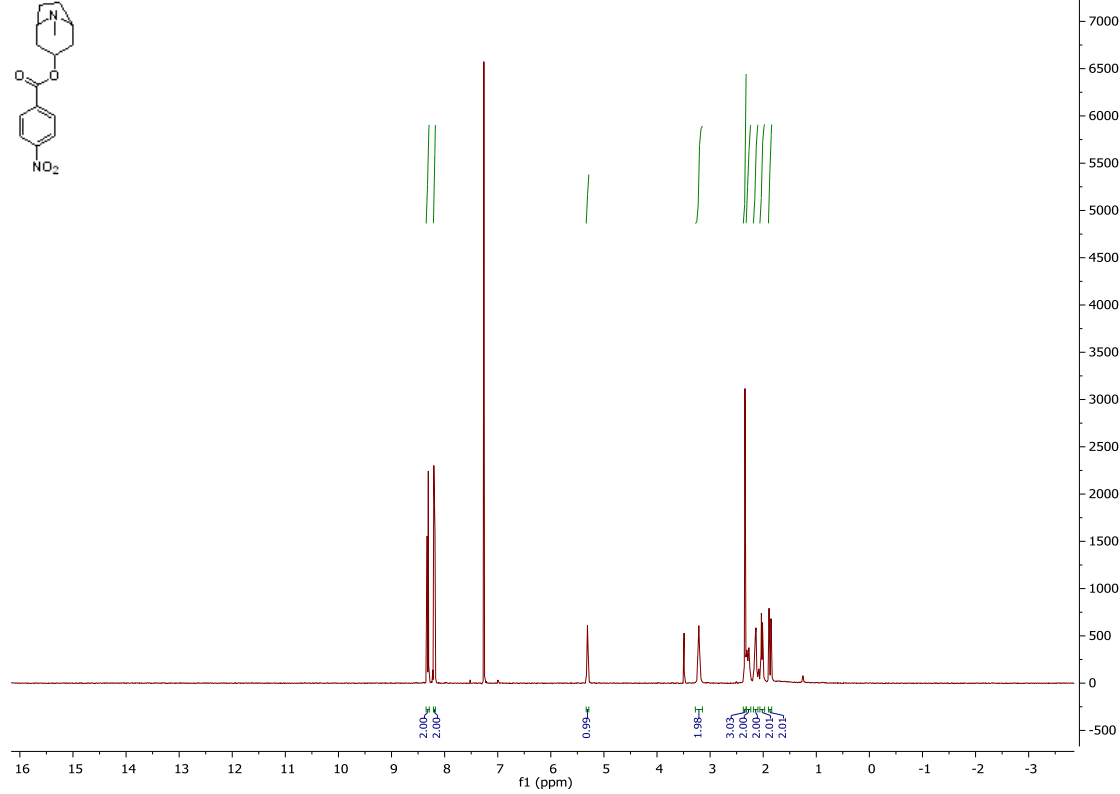

### 4-nitrobenzoate

### 8-methyl-8-azabicyclo[3.2.1]octan-3-yl

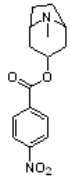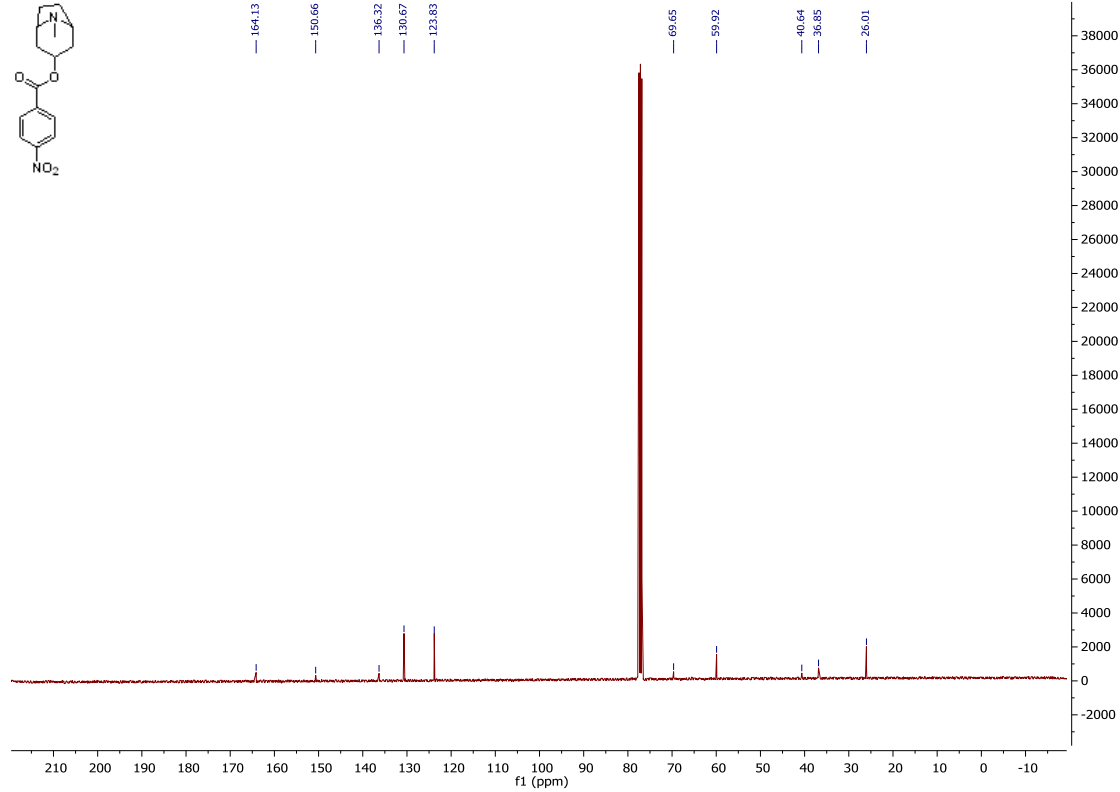

### 4-nitrobenzoate

**7-((2,2-dimethyl-4,6-dioxo-1,3-dioxan-5-ylidene)-1 $\lambda$ -iodaneyl)-6-methoxy-1,3,4,9,10,10a-hexahydro-2H-9,4a-(epiminoethano)phenanthrene-11-carbaldehyde**

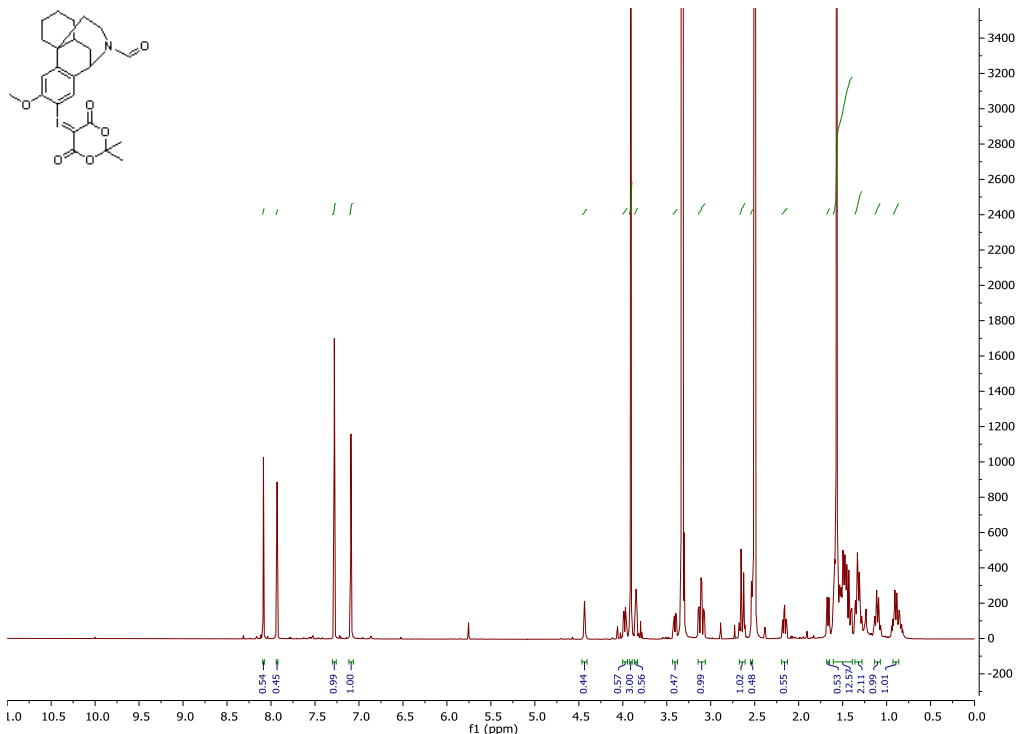

**7-((2,2-dimethyl-4,6-dioxo-1,3-dioxan-5-ylidene)-1 $\lambda$ -iodaneyl)-6-methoxy-1,3,4,9,10,10a-hexahydro-2H-9,4a-(epiminoethano)phenanthrene-11-carbaldehyde**

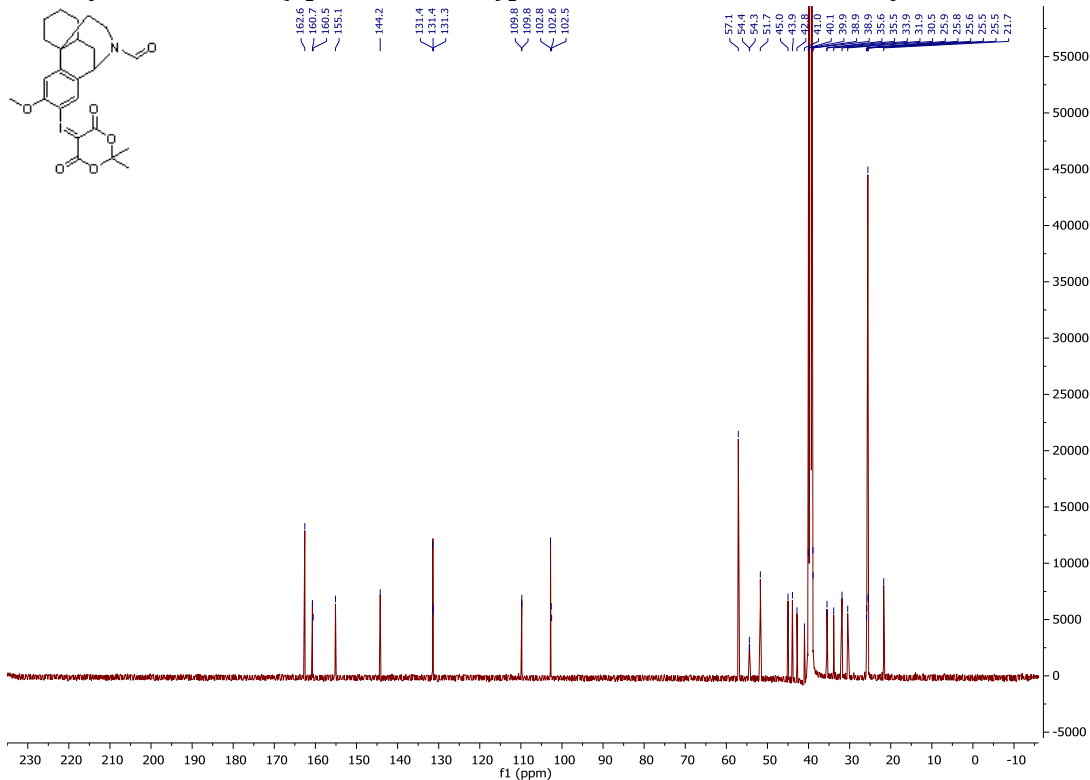

**8-methyl-8-azabicyclo[3.2.1]octan-3-yl 4-((2,2-dimethyl-4,6-dioxo-1,3-dioxan-5-ylidene)-1,3-iodaneyl)benzoate**

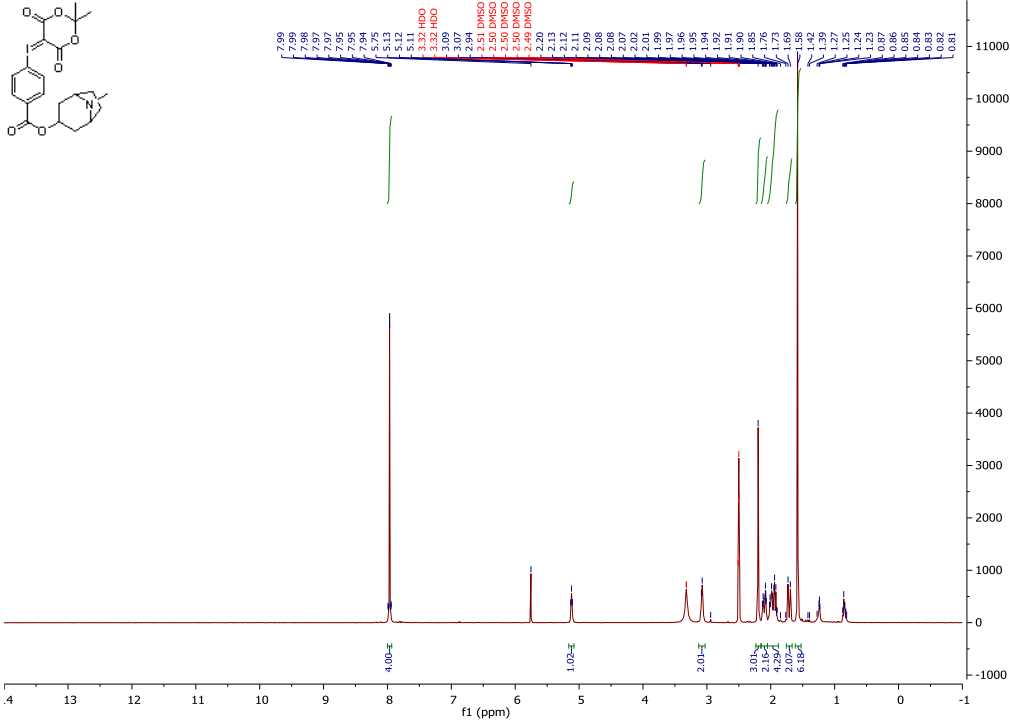

**8-methyl-8-azabicyclo[3.2.1]octan-3-yl 4-((2,2-dimethyl-4,6-dioxo-1,3-dioxan-5-ylidene)-1,3-iodaneyl)benzoate**

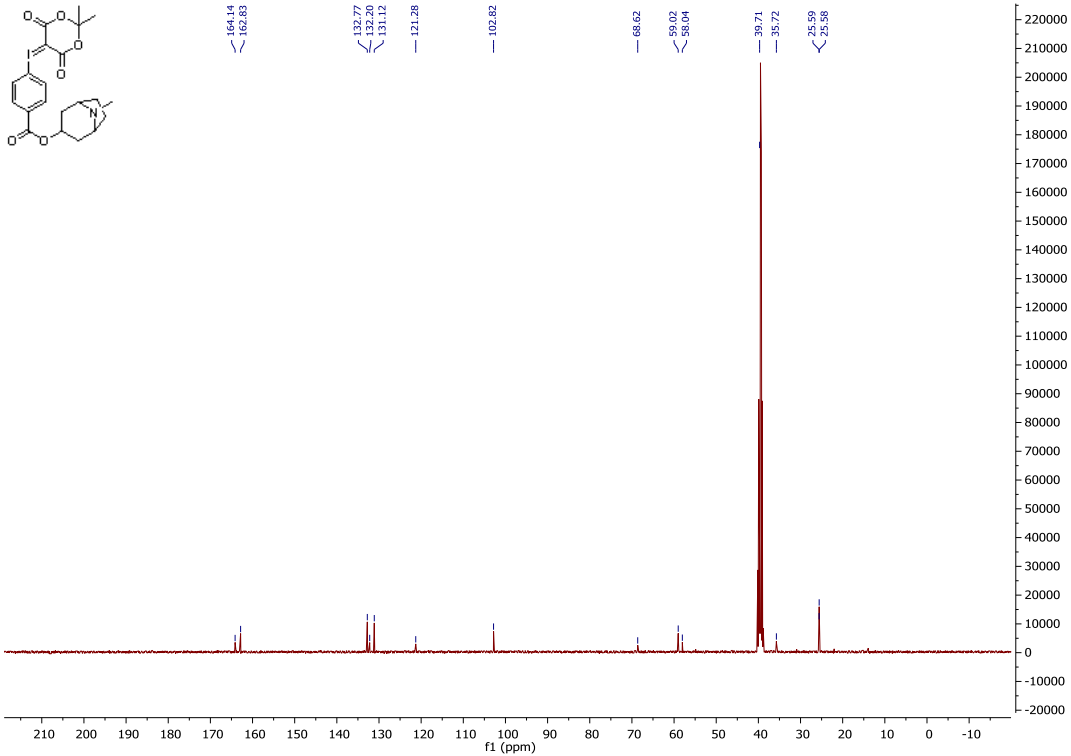

### 5-((4-methoxyphenyl)-13-iodaneylidene)-2,2-dimethyl-1,3-dioxane-4,6-dione

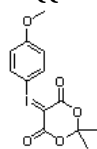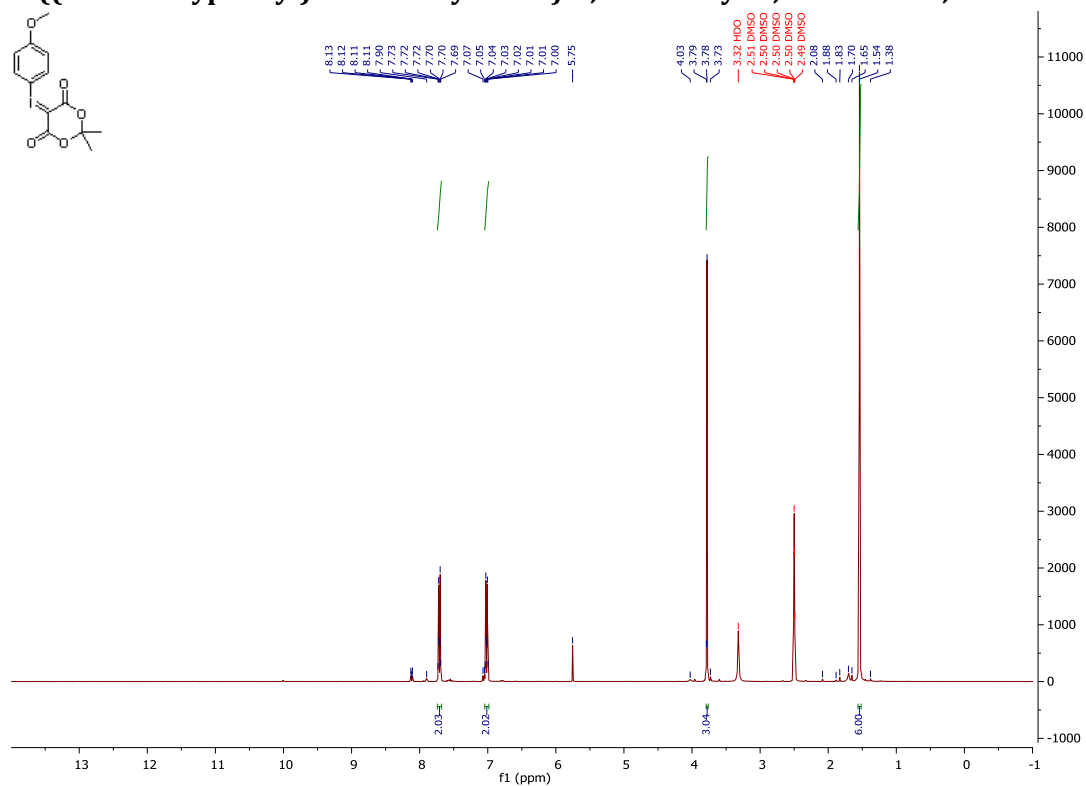

### 5-((4-methoxyphenyl)-13-iodaneylidene)-2,2-dimethyl-1,3-dioxane-4,6-dione

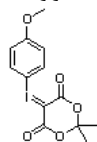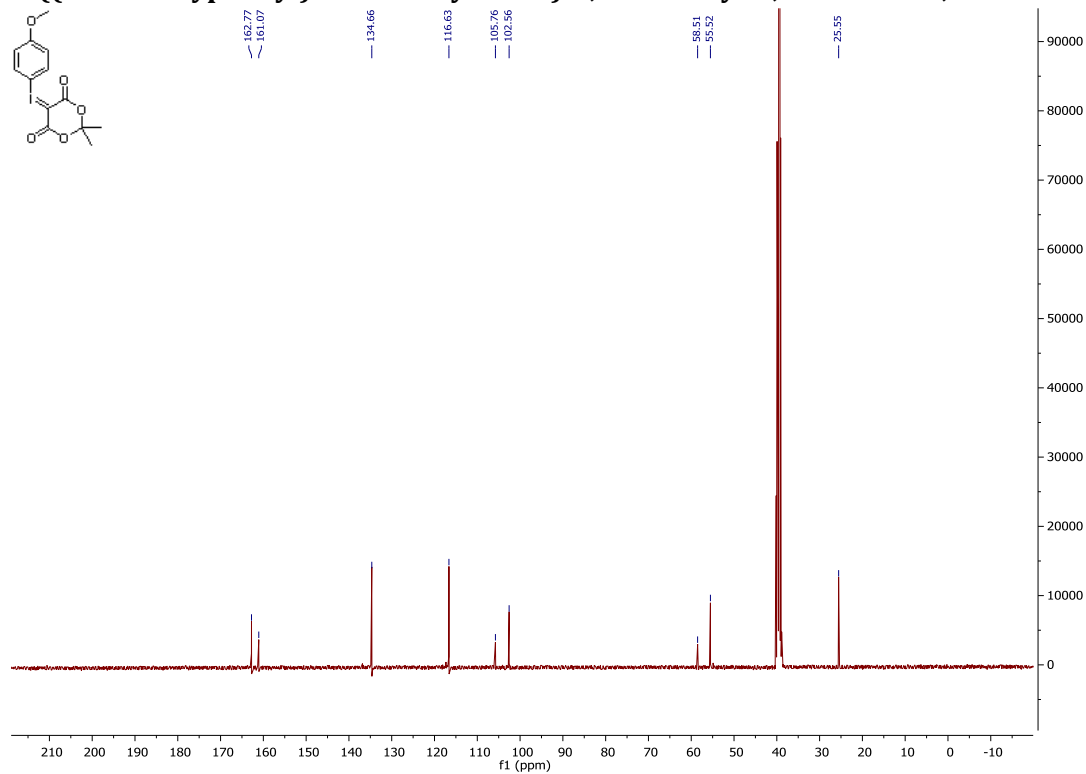

**5-((4-(benzyloxy)-2-fluorophenyl)-1,3-iodaneylidene)-2,2-dimethyl-1,3-dioxane-4,6-dione**

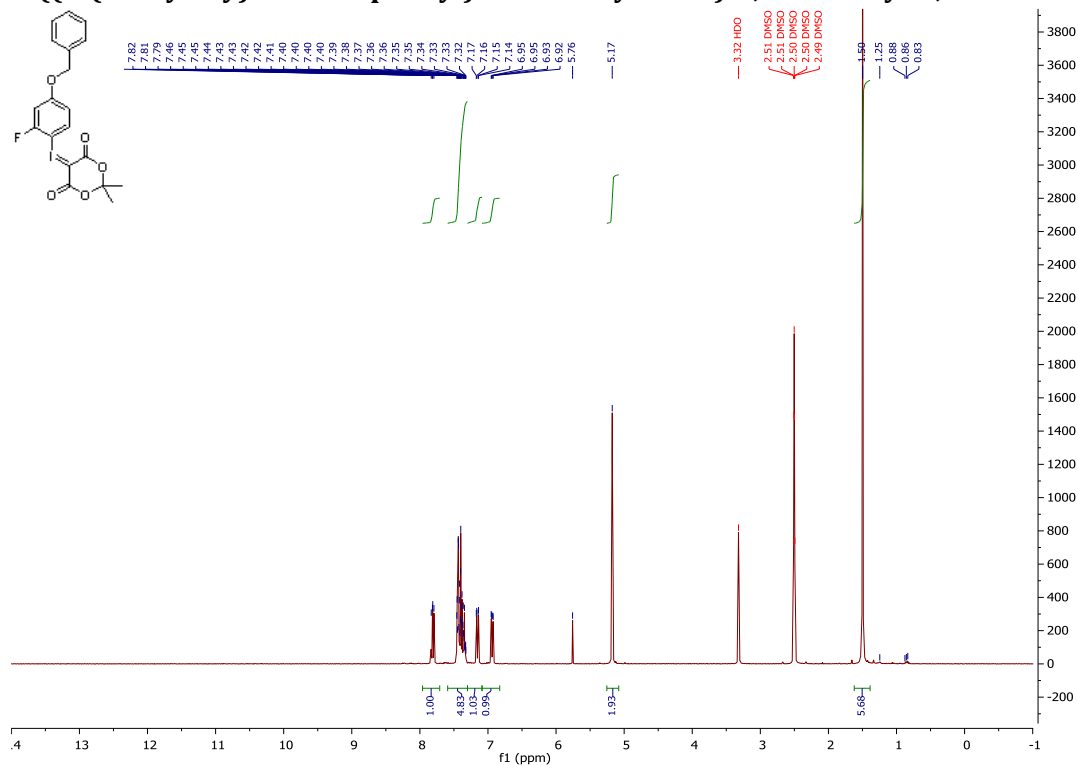

**5-((4-(benzyloxy)-2-fluorophenyl)-1,3-iodaneylidene)-2,2-dimethyl-1,3-dioxane-4,6-dione**

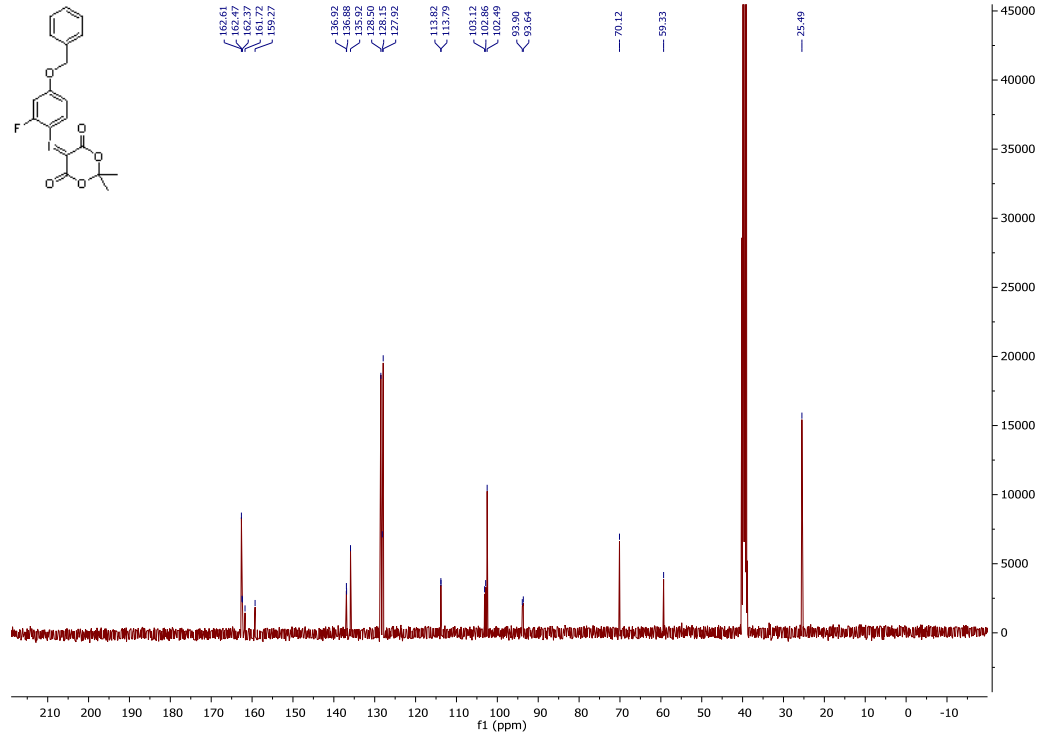



5-((4-(benzyloxy)-2-fluorophenyl)-13-iodaneylidene)-2,2-dimethyl-1,3-dioxane-4,6-

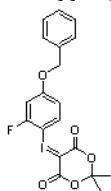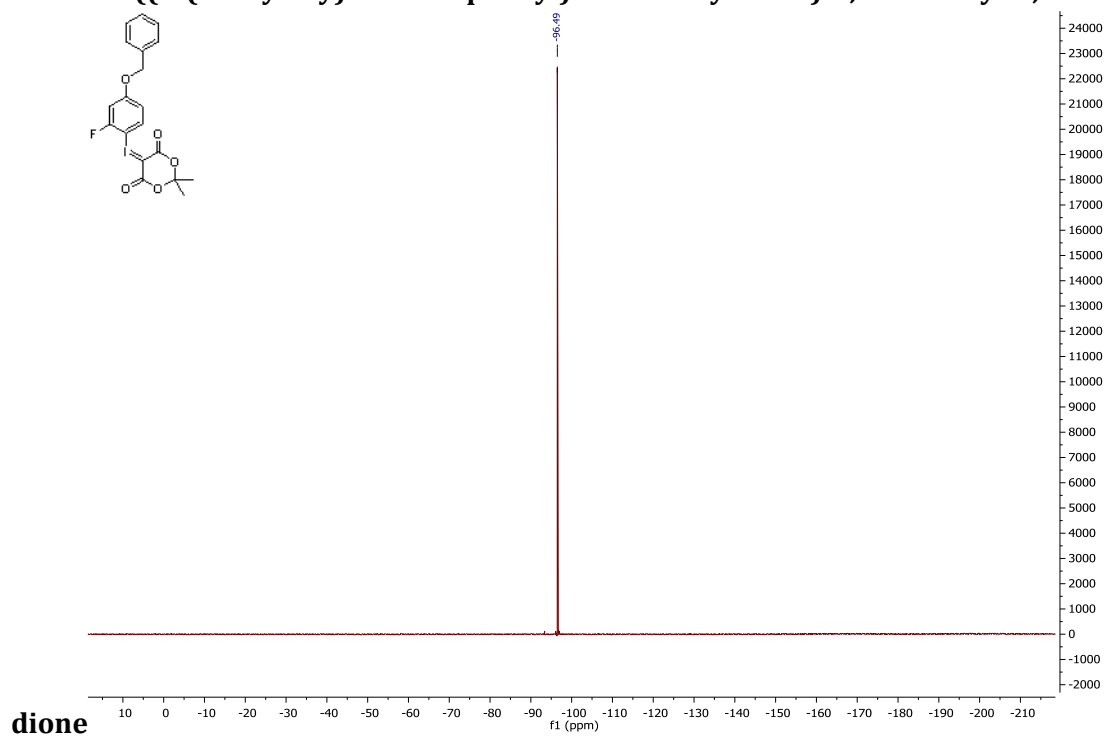

4-(benzyloxy)-1,2-difluorobenzene

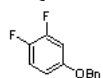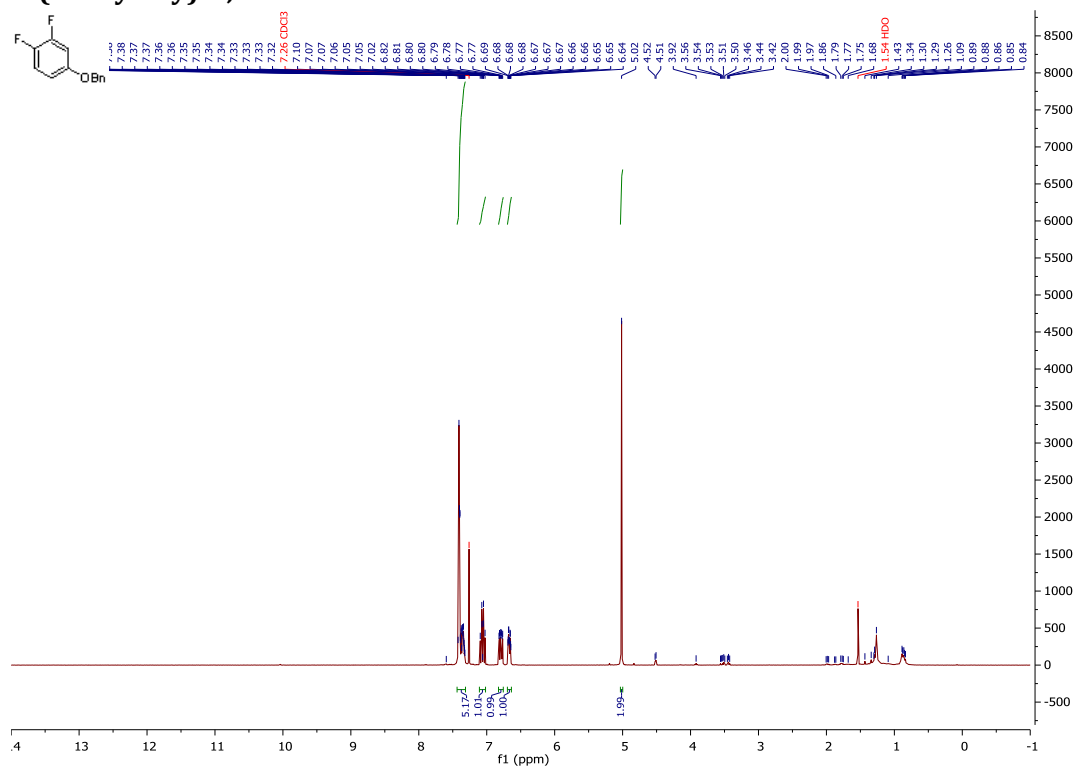

### 4-(benzyloxy)-1,2-difluorobenzene

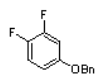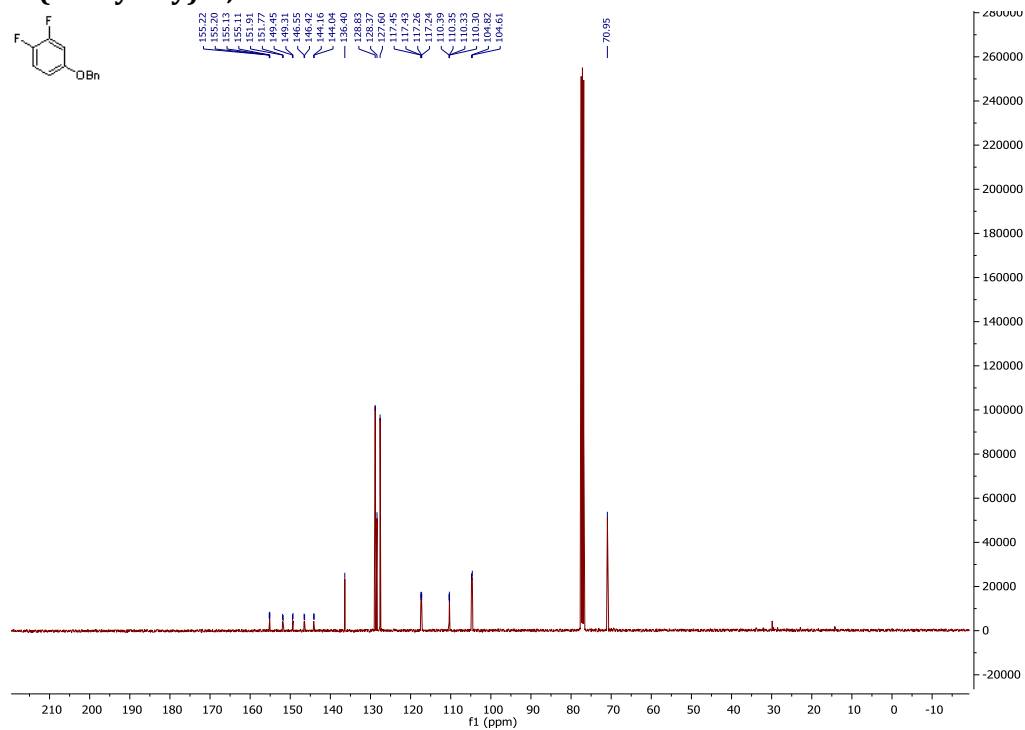

### 4-(benzyloxy)-1,2-difluorobenzene

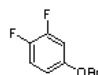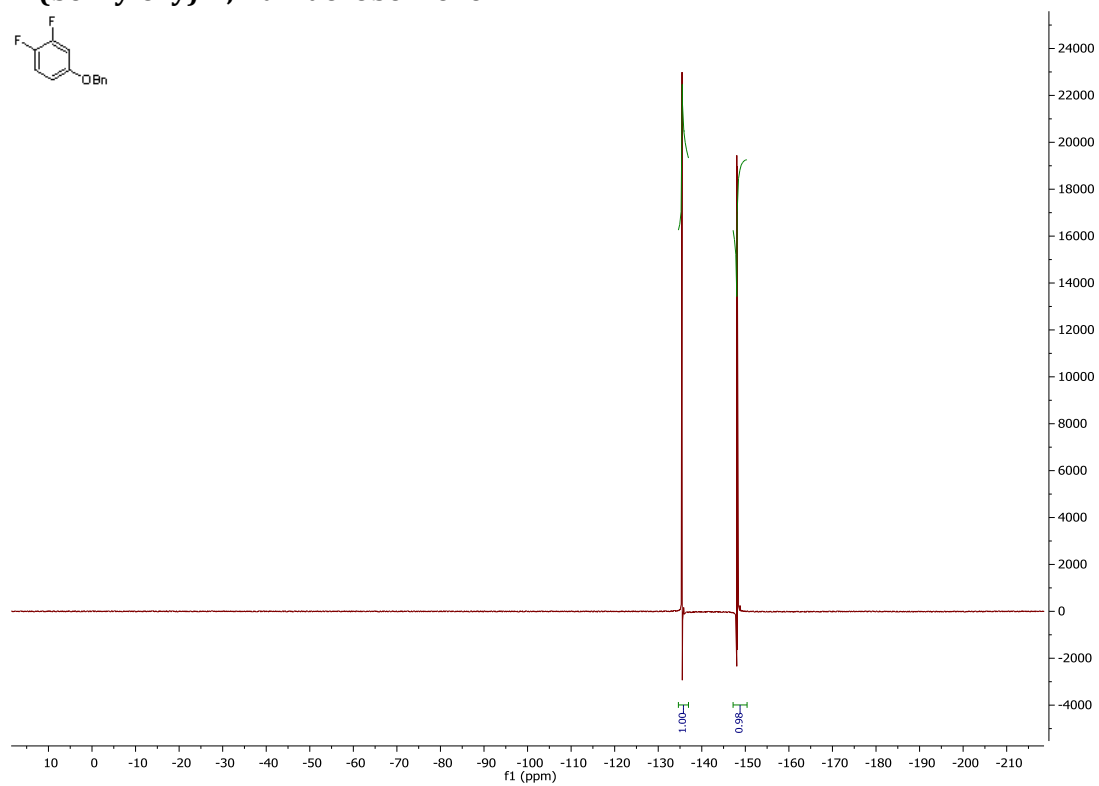

tert-butyl

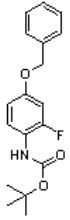

(4-(benzyloxy)-2-fluorophenyl)carbamate

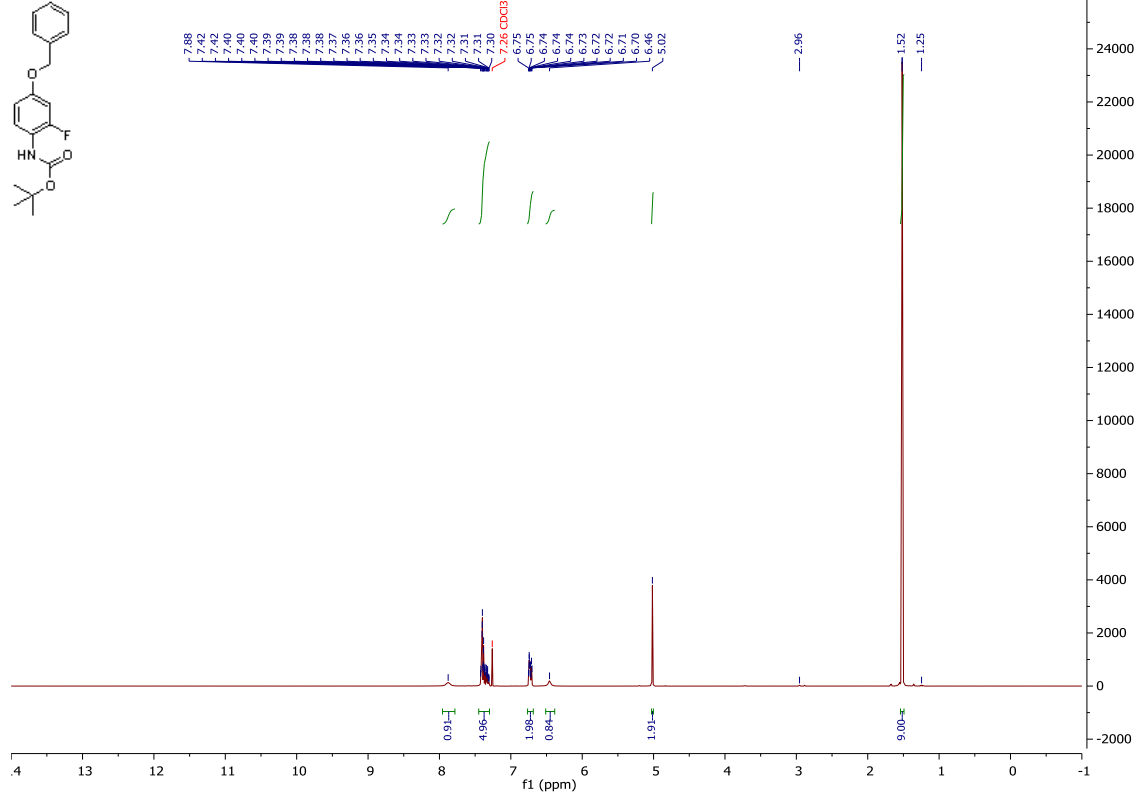

tert-butyl

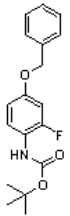

(4-(benzyloxy)-2-fluorophenyl)carbamate

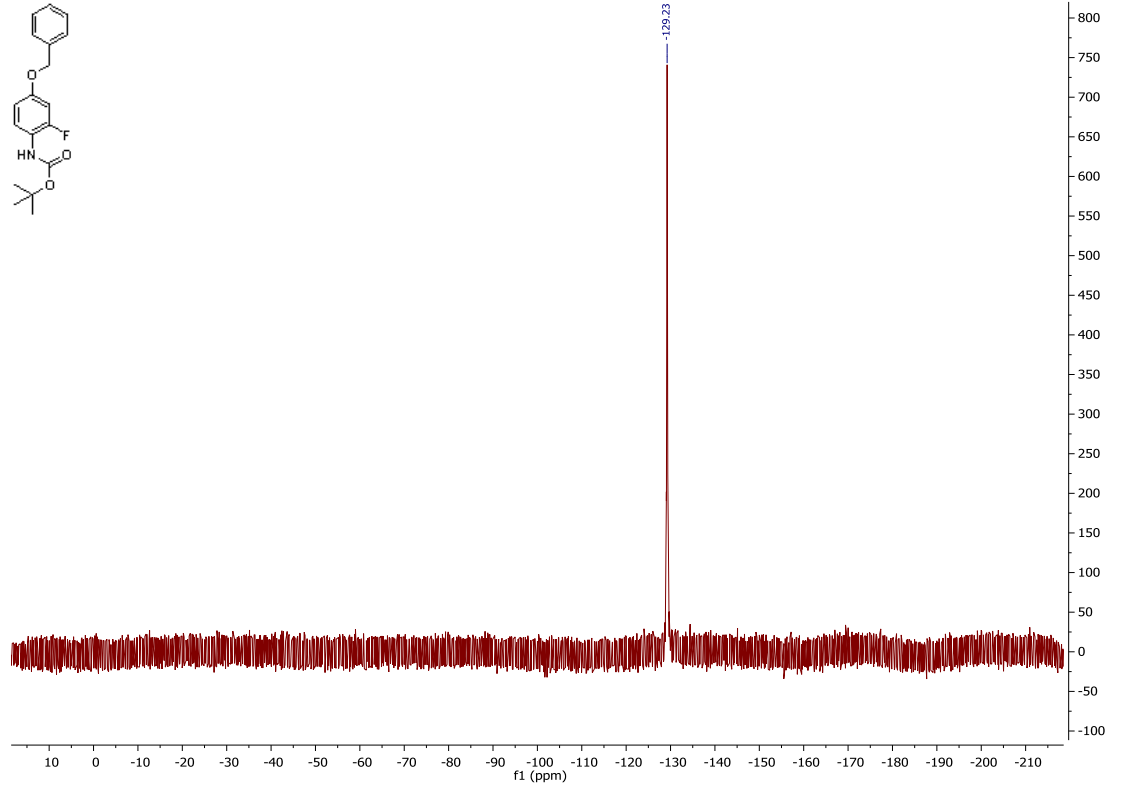

tert-butyl

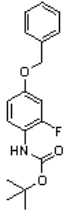

(4-(benzyloxy)-2-fluorophenyl)carbamate

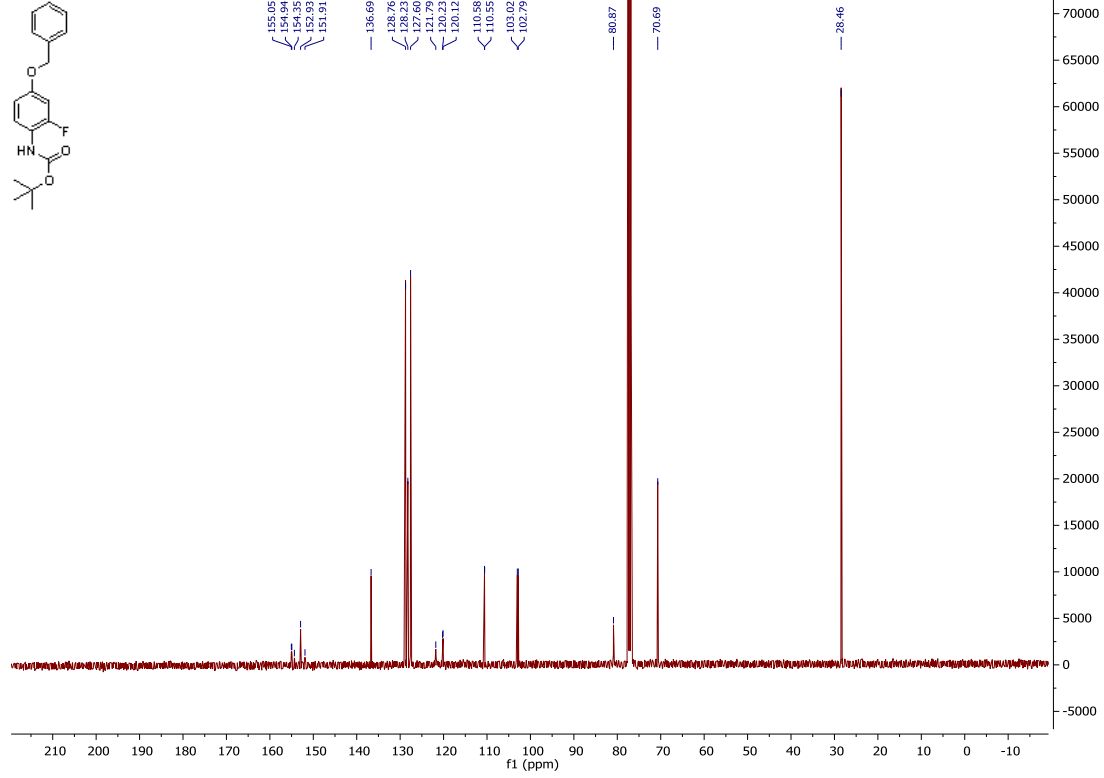

4-(benzyloxy)-2-fluoroaniline

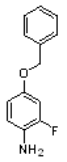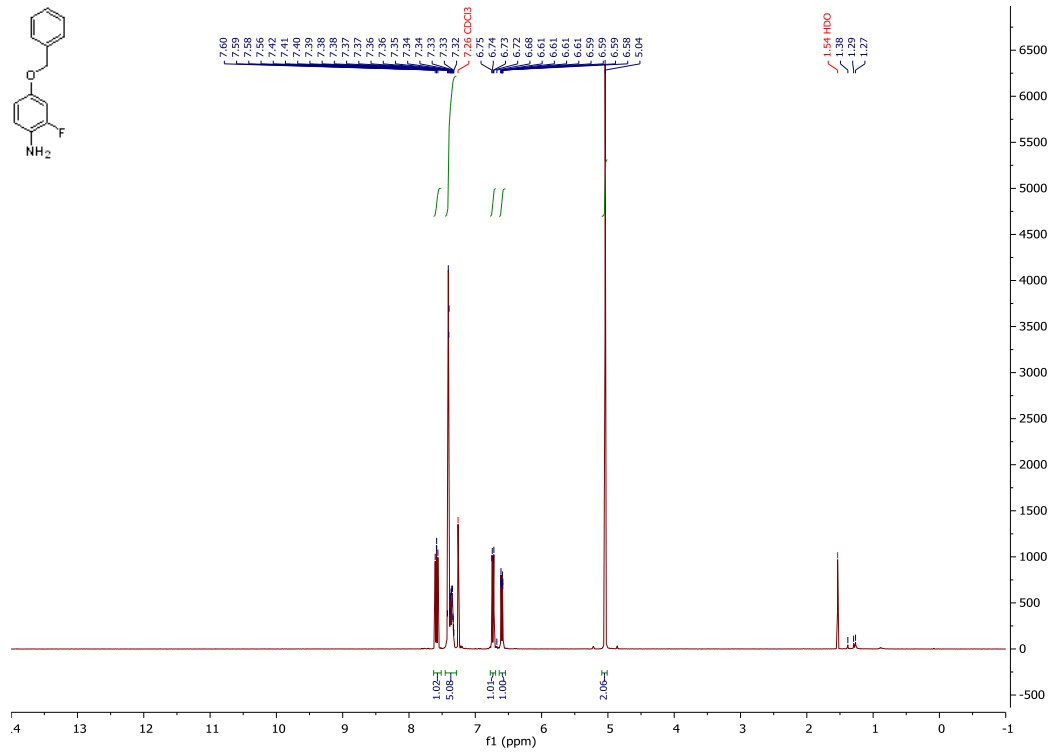

### 4-(benzyloxy)-2-fluoroaniline

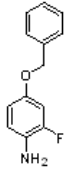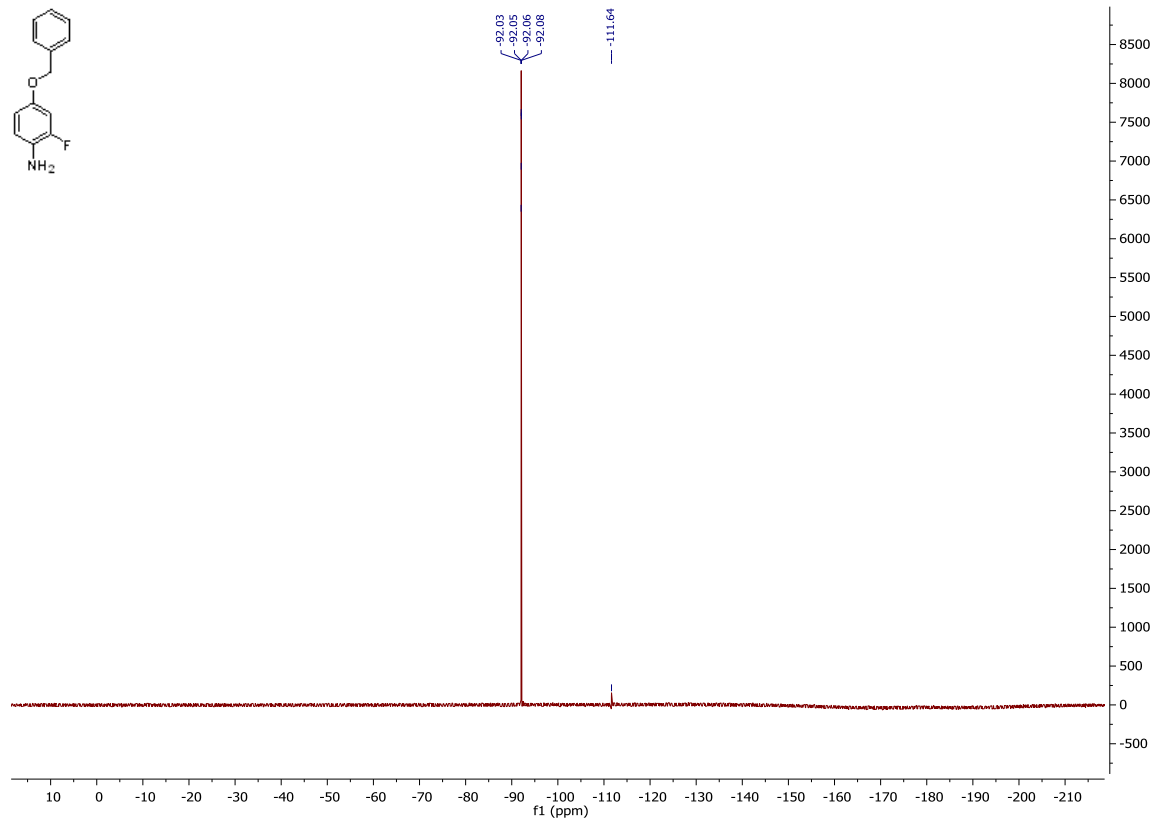

### 4-(benzyloxy)-2-fluoroaniline

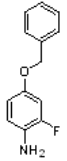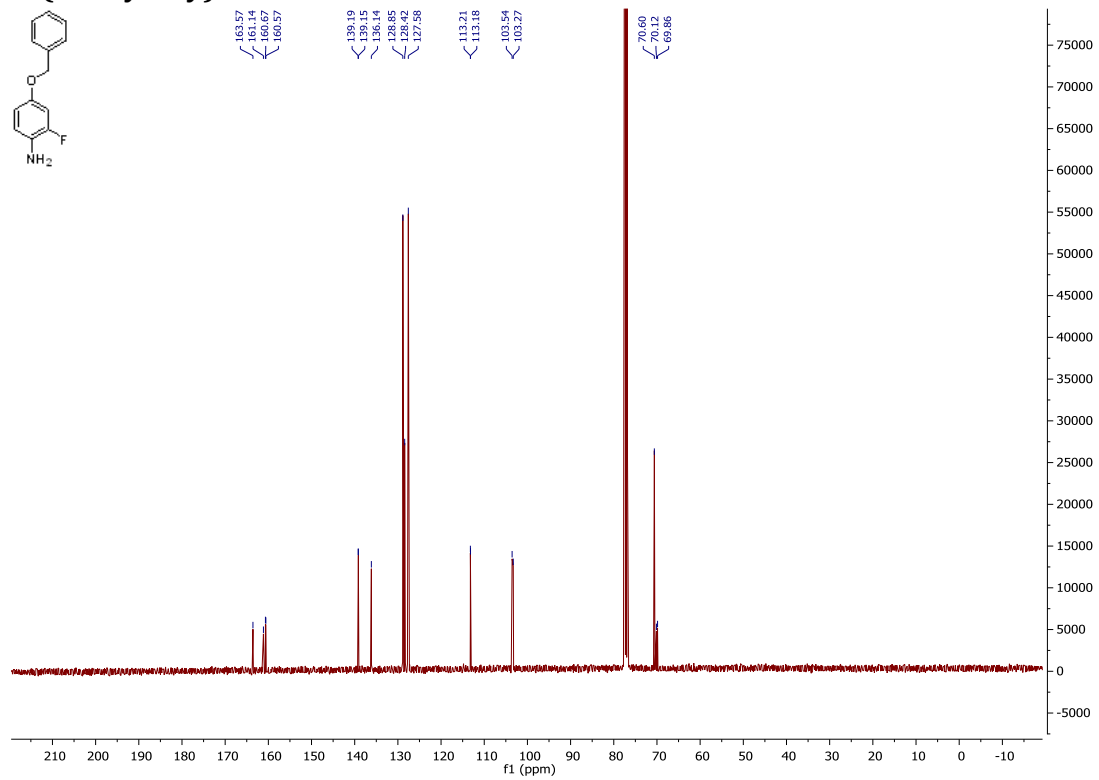

### 8-methyl-8-azabicyclo[3.2.1]octan-3-yl

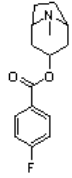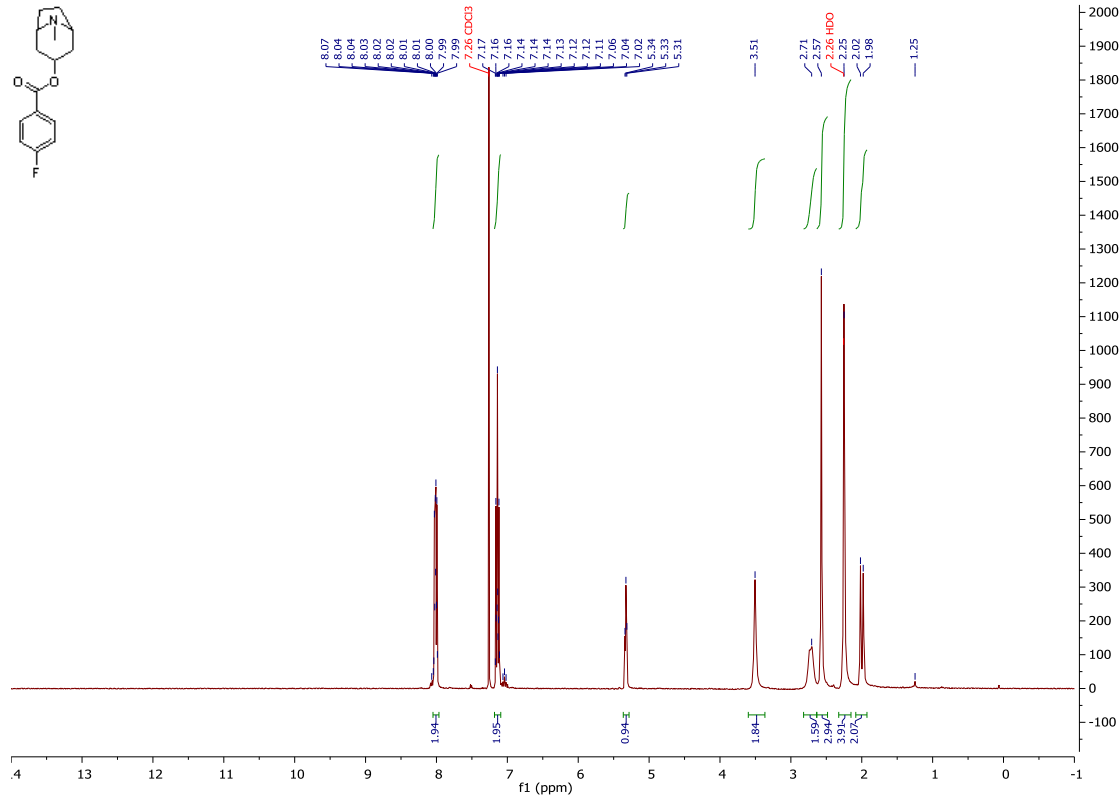

### 4-fluorobenzoate

### 8-methyl-8-azabicyclo[3.2.1]octan-3-yl

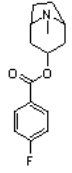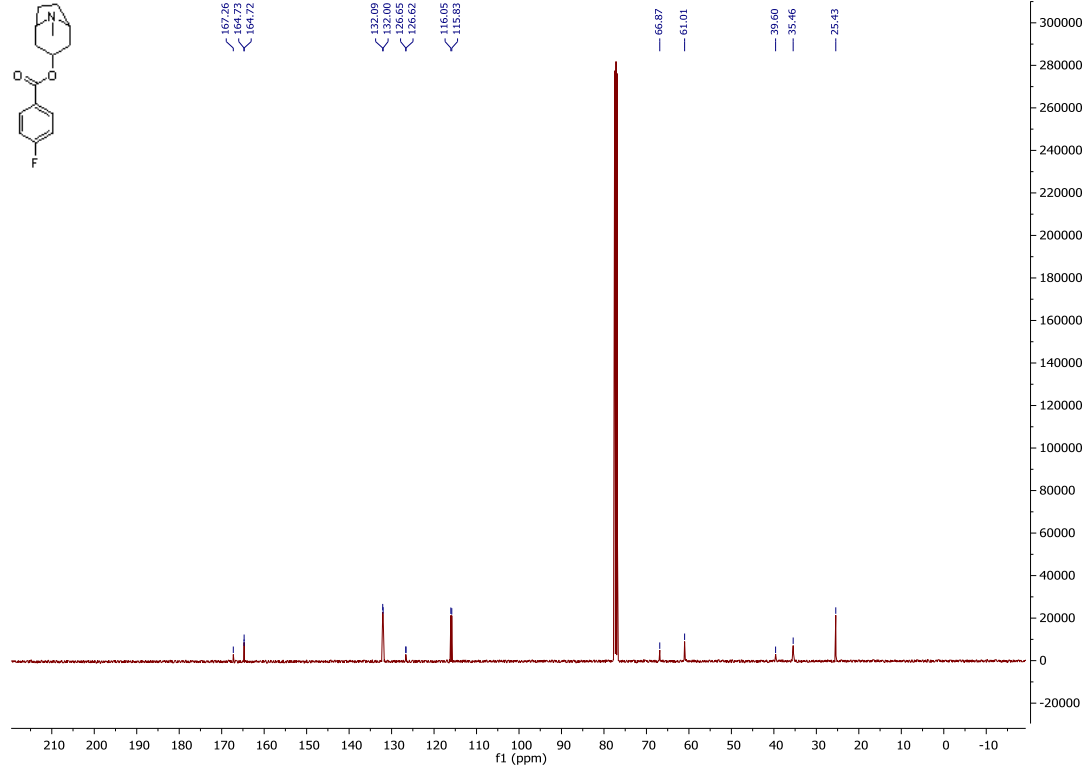

### 4-fluorobenzoate

### 8-methyl-8-azabicyclo[3.2.1]octan-3-yl

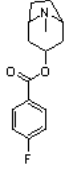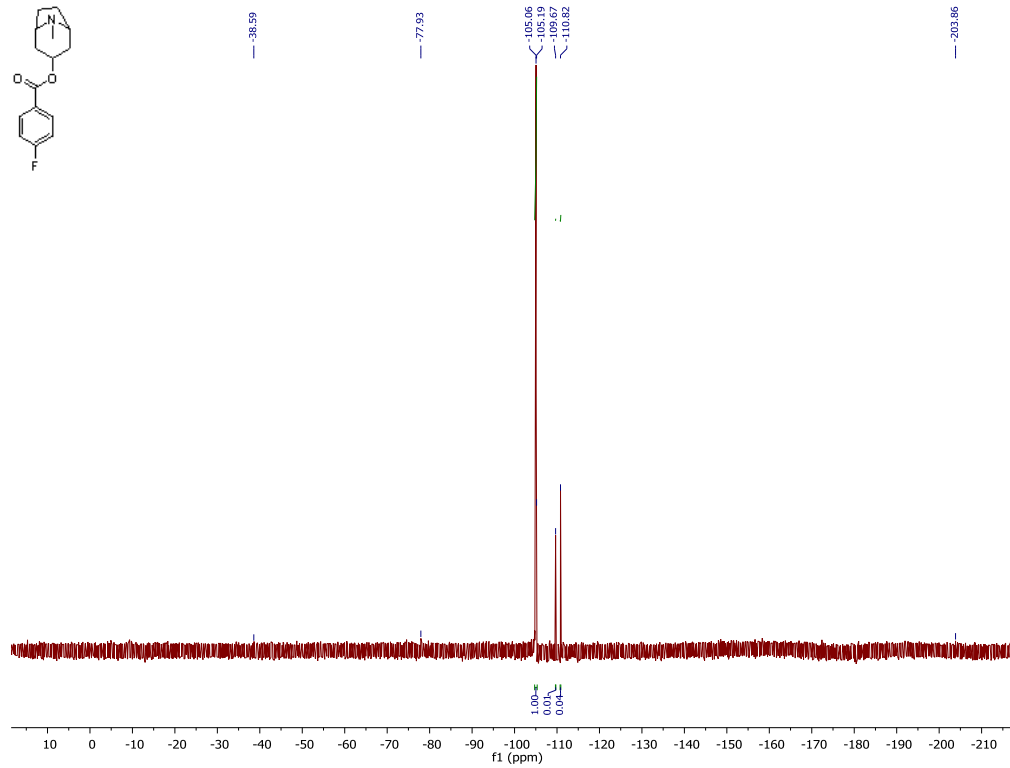

### 2,2-dimethyl-5-(phenyl-13-iodanelylidene)-1,3-dioxane-4,6-dione

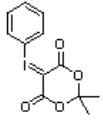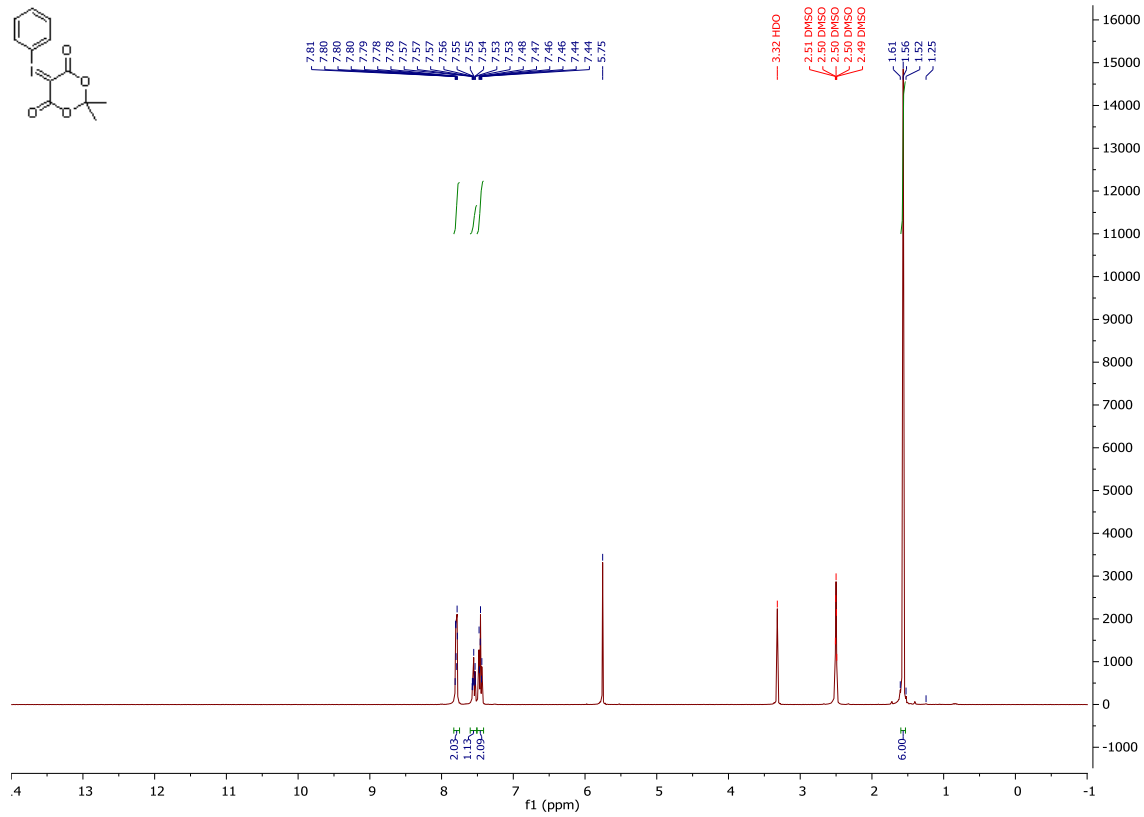

### 2,2-dimethyl-5-(phenyl-13-iodaneylidene)-1,3-dioxane-4,6-dione

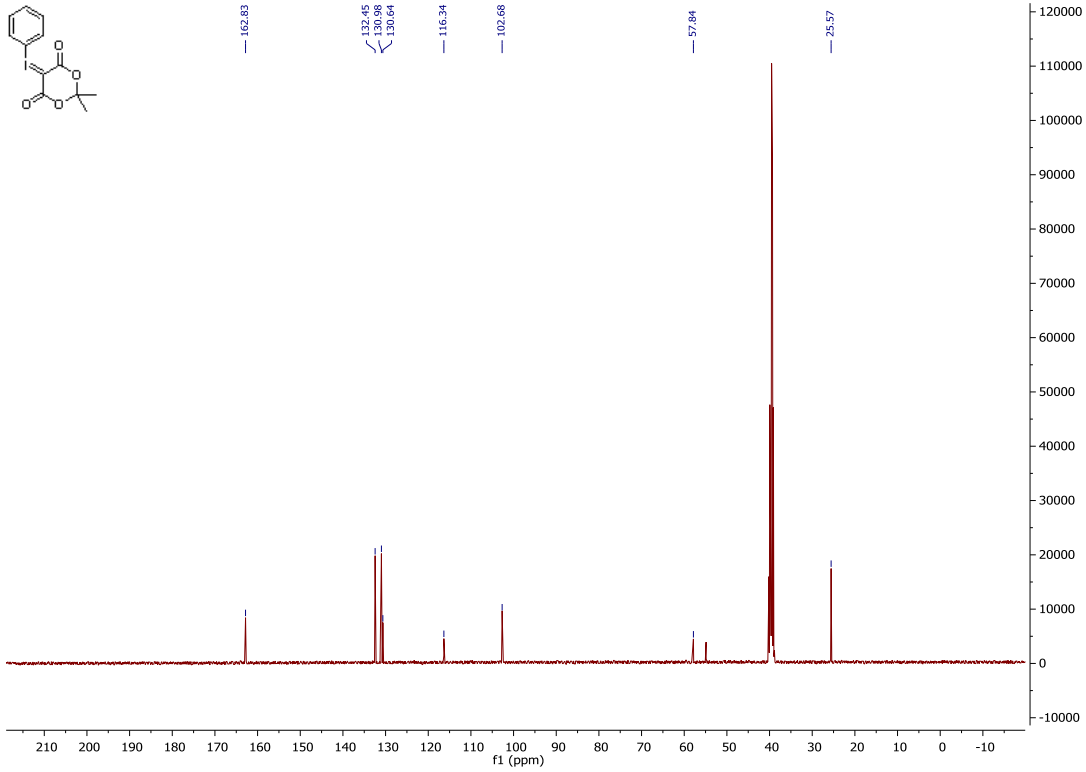

### 4-((2,2-dimethyl-4,6-dioxo-1,3-dioxan-5-ylidene)-13-iodanyl)benzonitrile

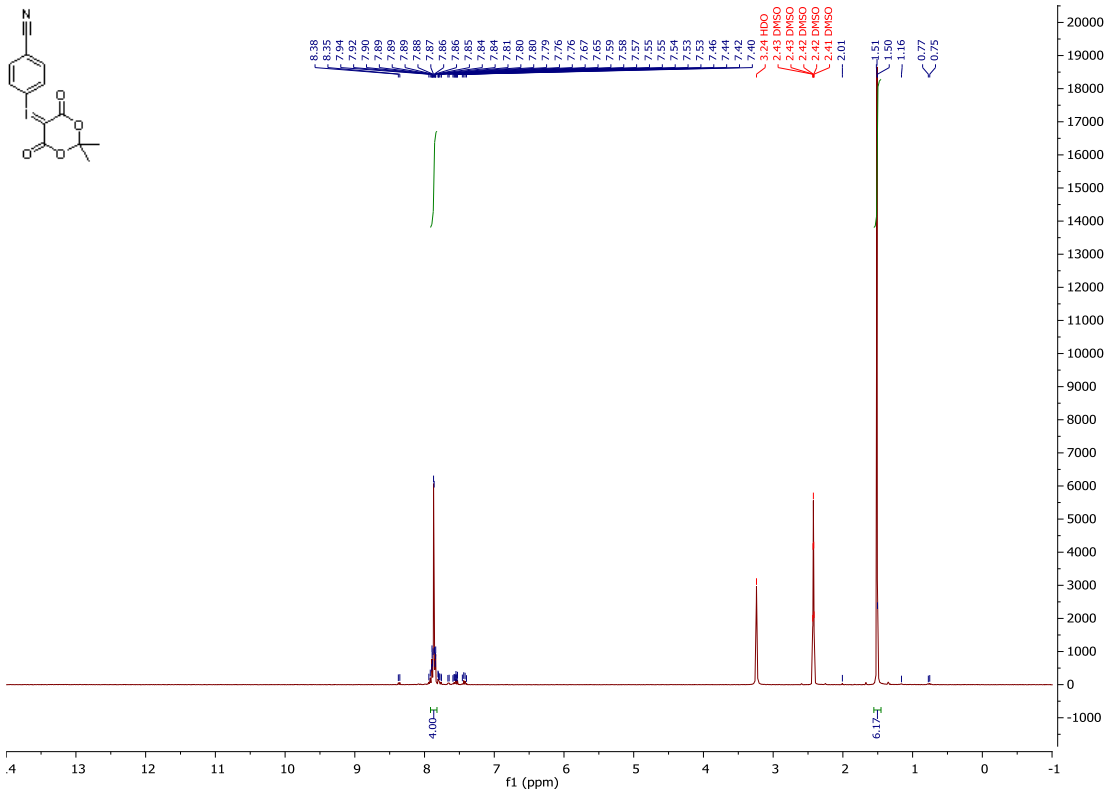



### 4-((2,2-dimethyl-4,6-dioxo-1,3-dioxan-5-ylidene)-1,3-iodaneryl)benzonitrile

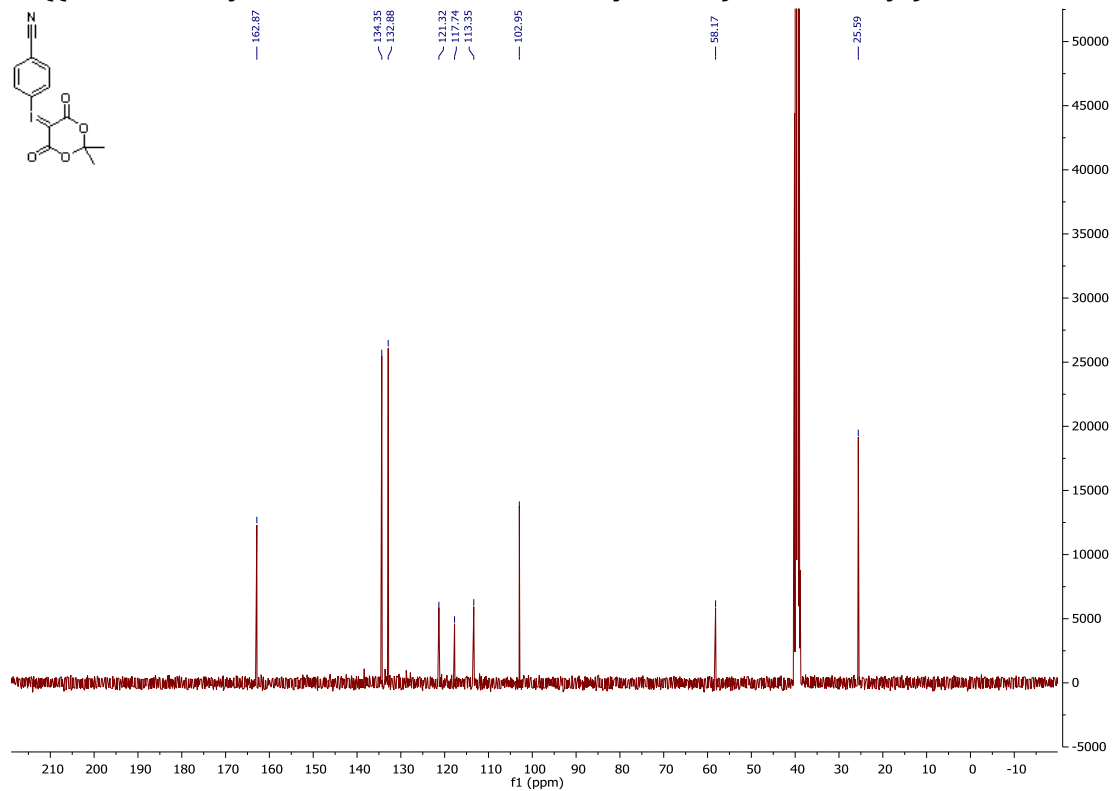

### 5-((4-chlorophenyl)-1,3-iodanerylidene)-2,2-dimethyl-1,3-dioxane-4,6-dione

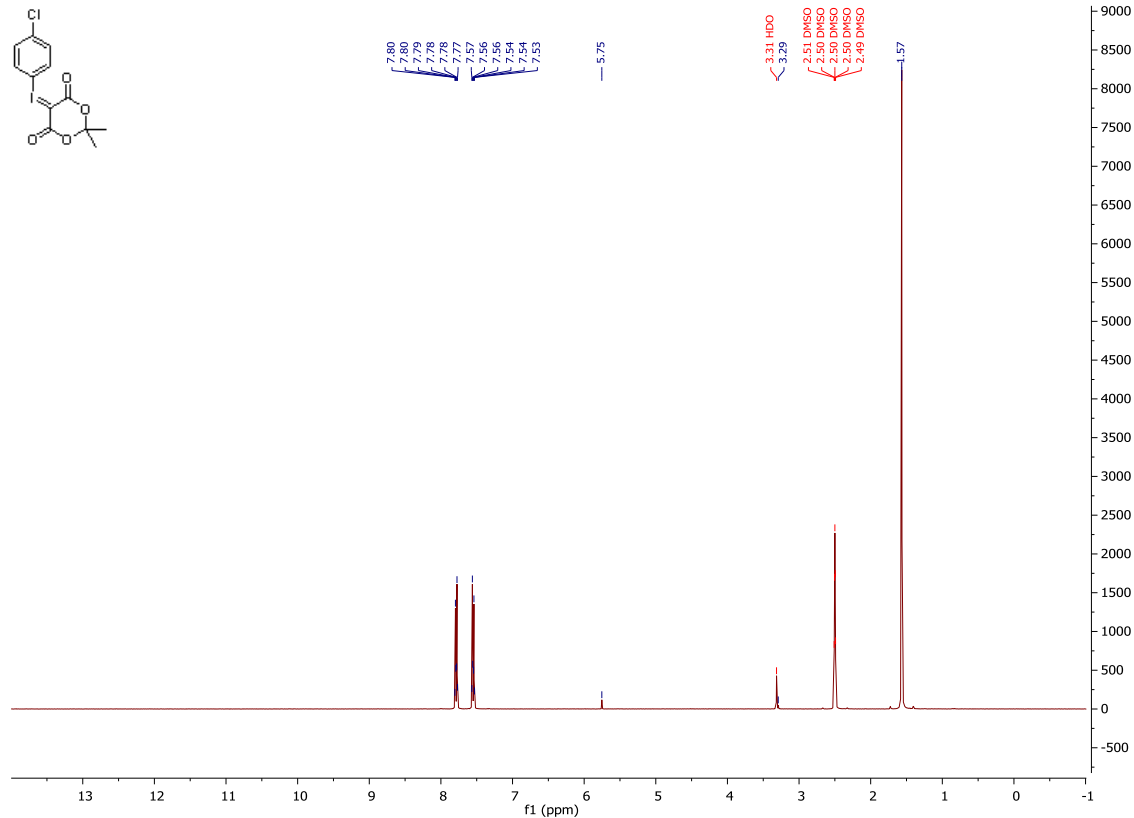

### 5-((4-chlorophenyl)-13-iodaneylidene)-2,2-dimethyl-1,3-dioxane-4,6-dione

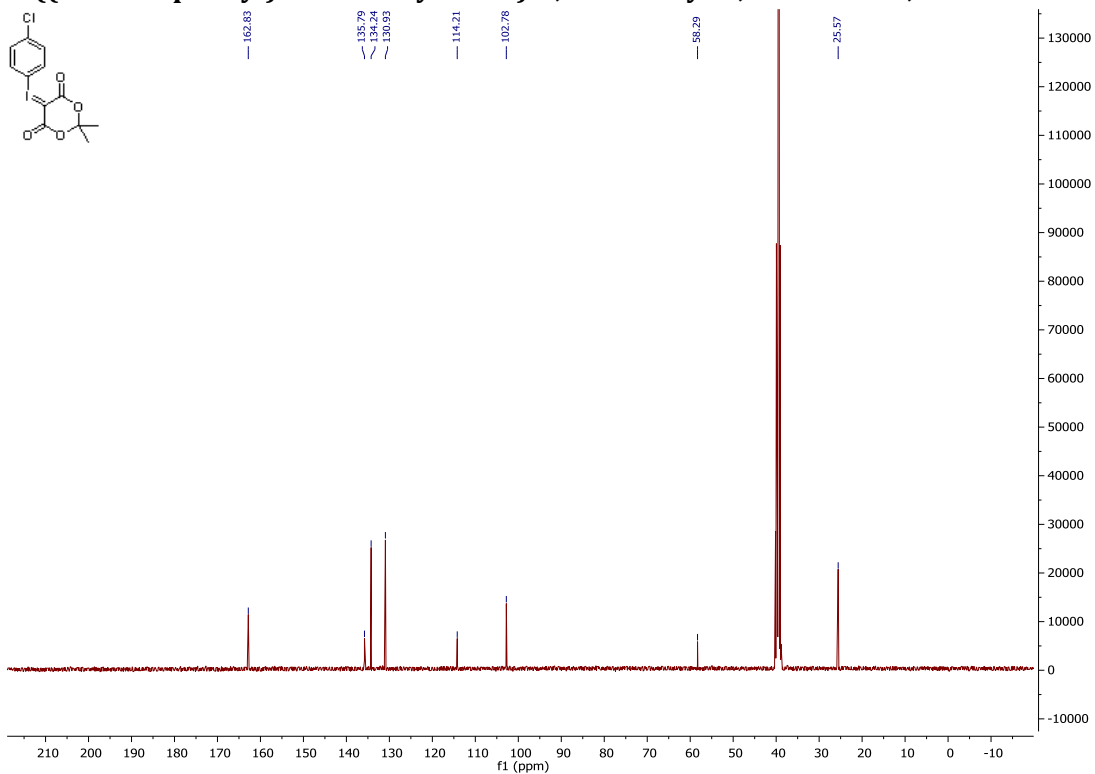

### 5-((3,5-dimethylphenyl)-13-iodaneylidene)-2,2-dimethyl-1,3-dioxane-4,6-dione

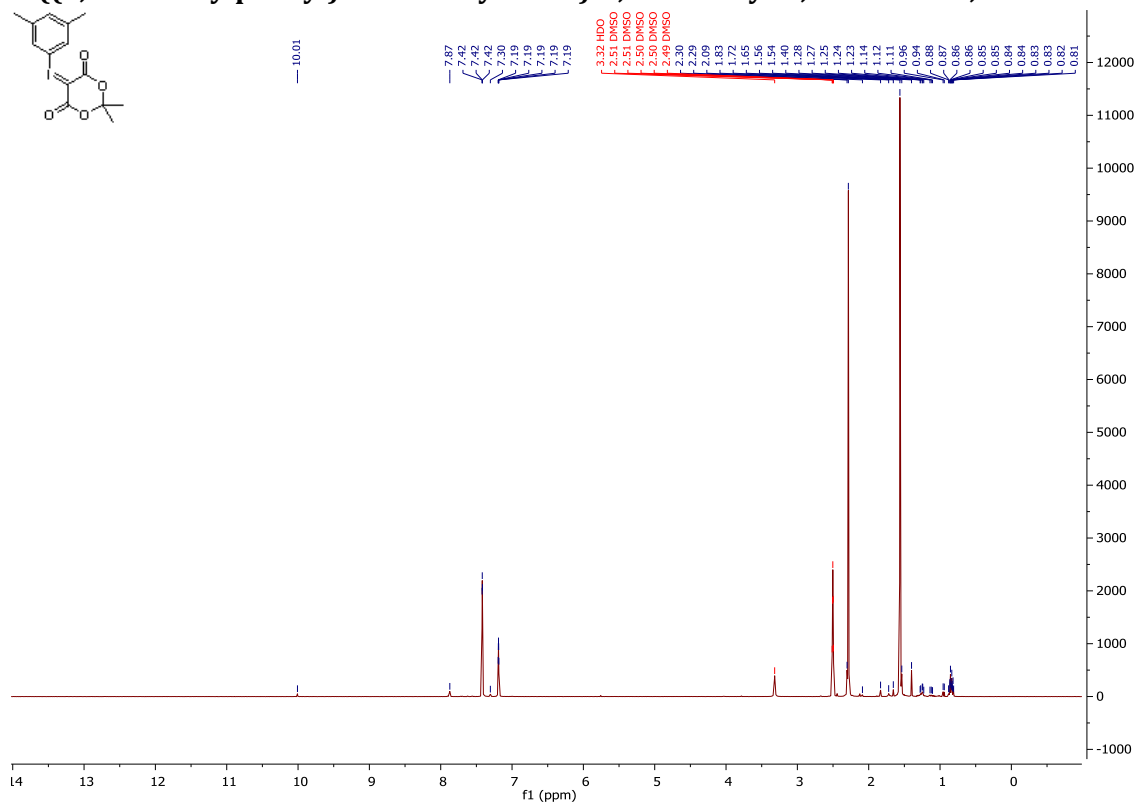

**5-((3,5-dimethylphenyl)-13-iodaneylidene)-2,2-dimethyl-1,3-dioxane-4,6-dione**

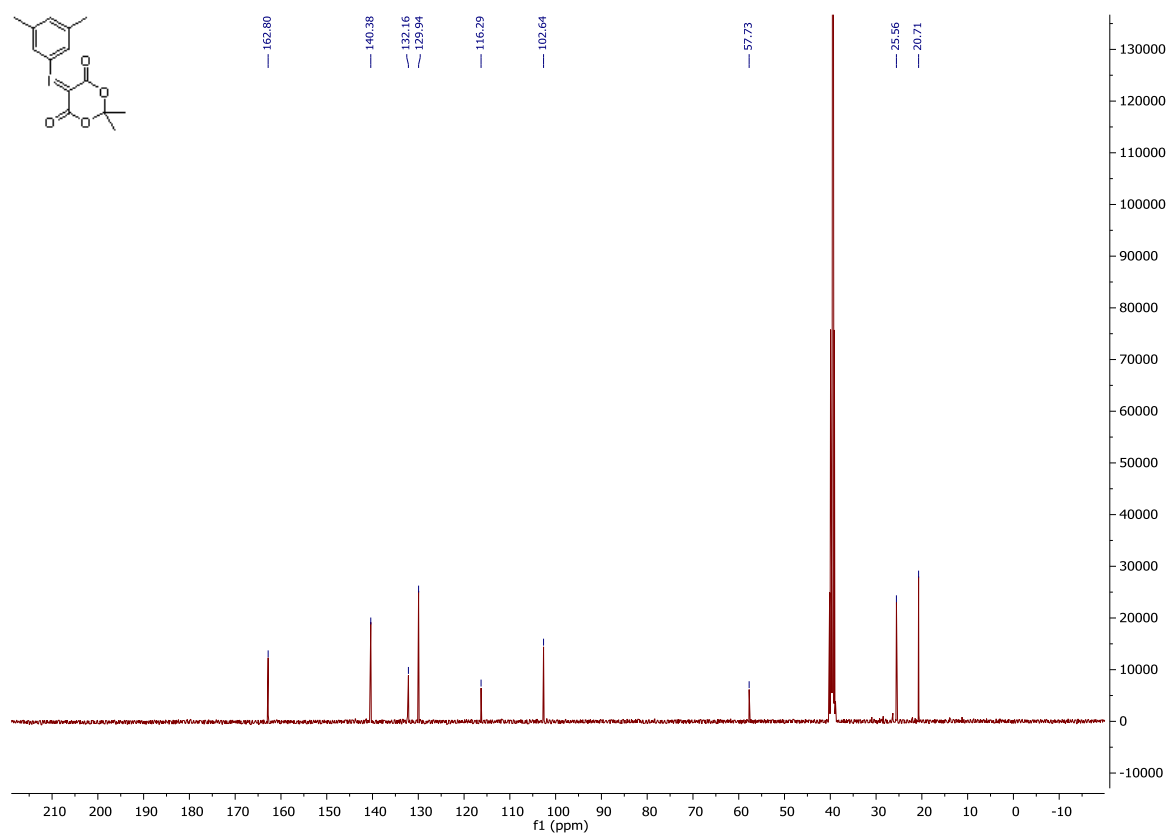

5-

**((2,6-dimethylphenyl)-13-iodaneylidene)-2,2-dimethyl-1,3-dioxane-4,6-dione**

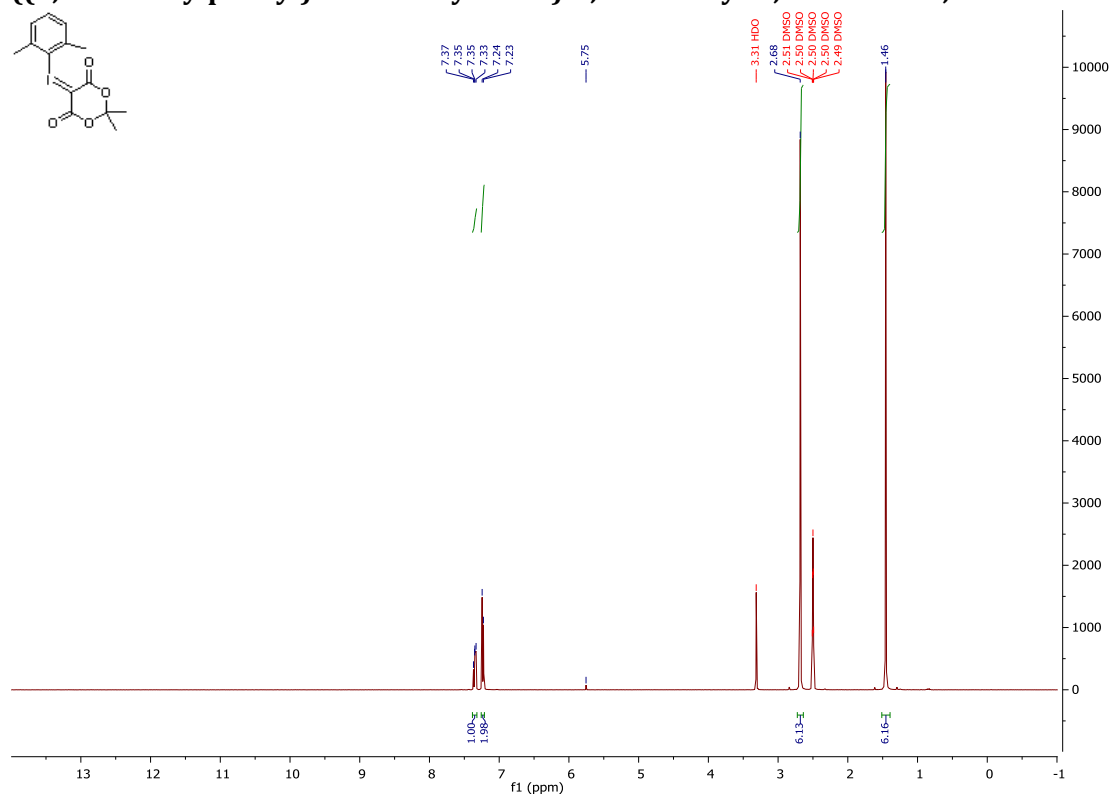

### 5-((2,6-dimethylphenyl)-1,3-iodaneylidene)-2,2-dimethyl-1,3-dioxane-4,6-dione

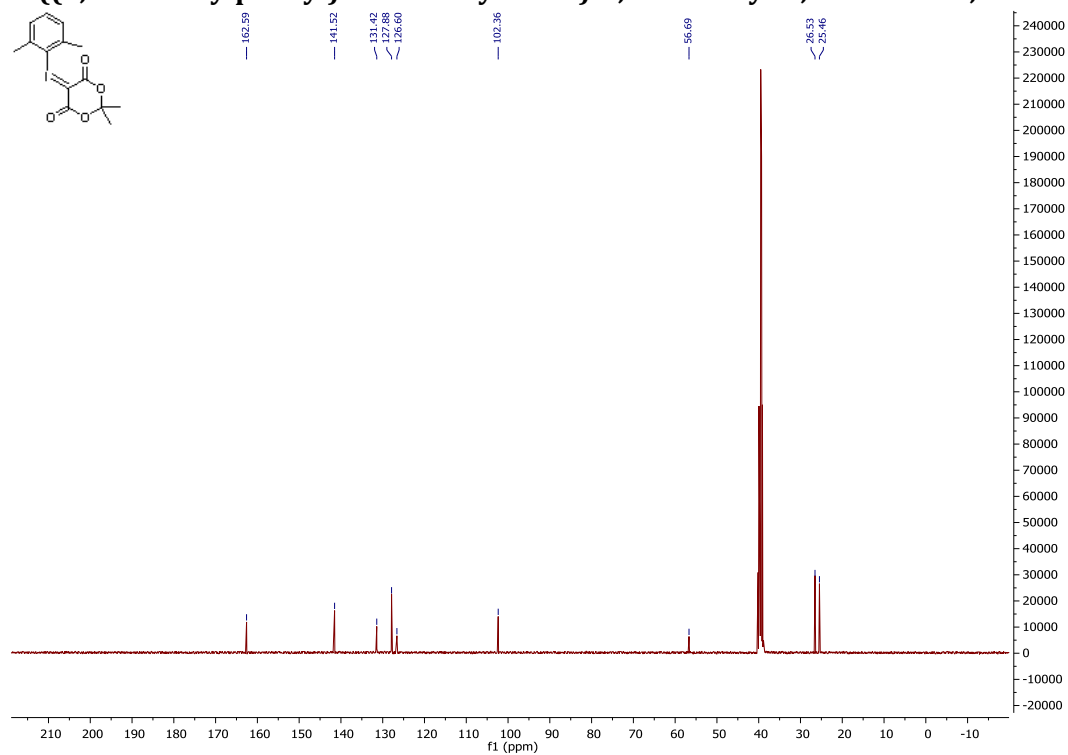

### 4-((2,2-dimethyl-4,6-dioxo-1,3-dioxan-5-ylidene)-1,3-iodanyl)-N,N-dimethylbenzamide

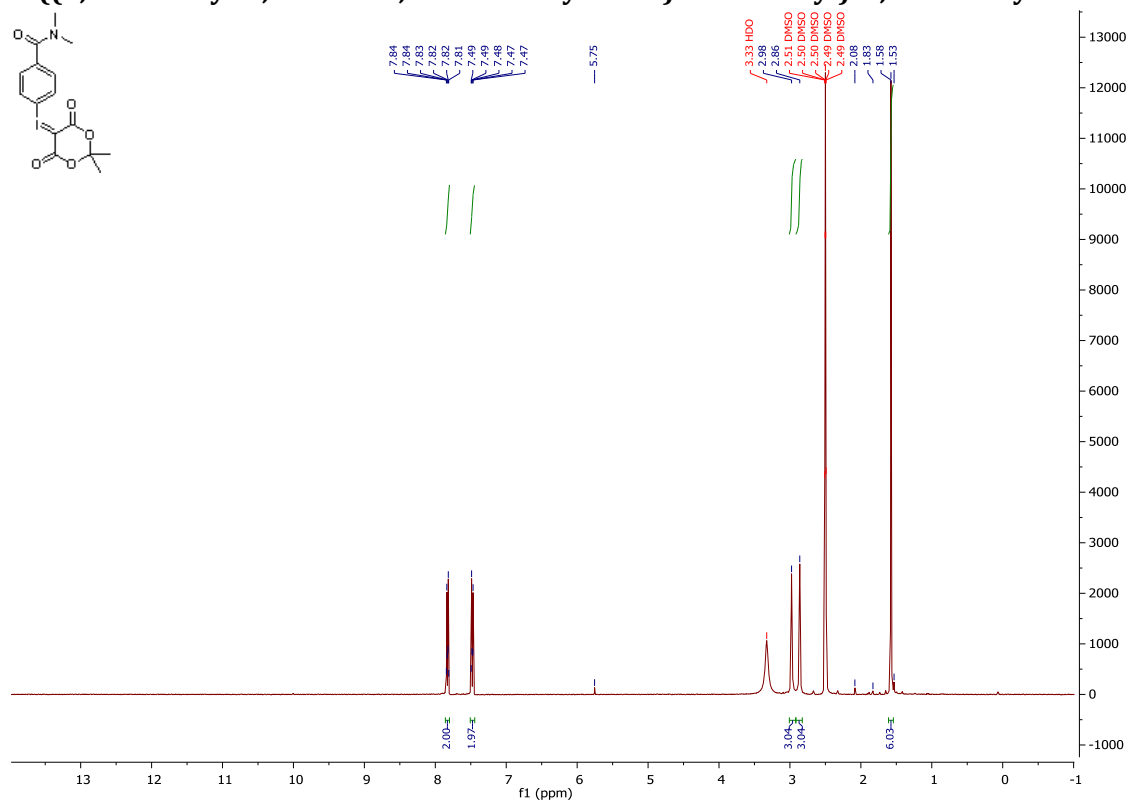

**4-((2,2-dimethyl-4,6-dioxo-1,3-dioxan-5-ylidene)-1,3-iodaneyl)-N,N-dimethylbenzamide**

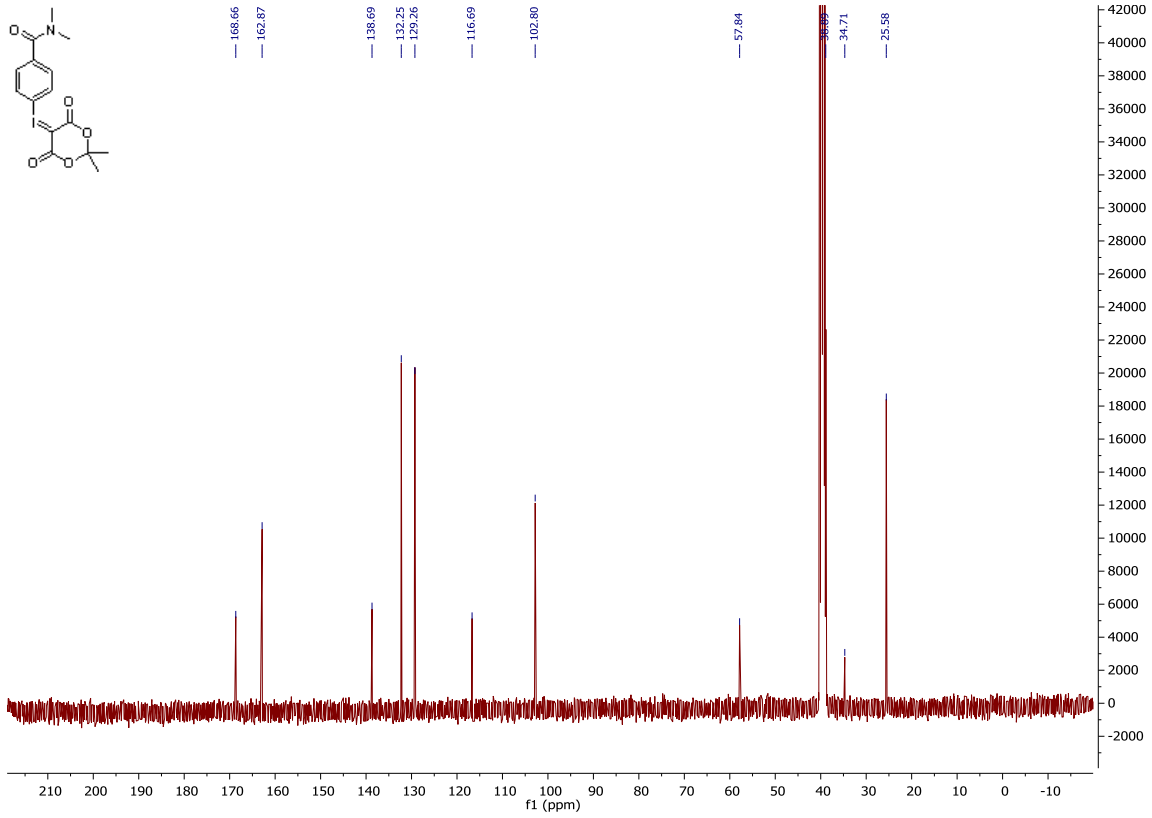

**5-((2-methoxyphenyl)-1,3-iodaneylidene)-2,2-dimethyl-1,3-dioxane-4,6-dione**

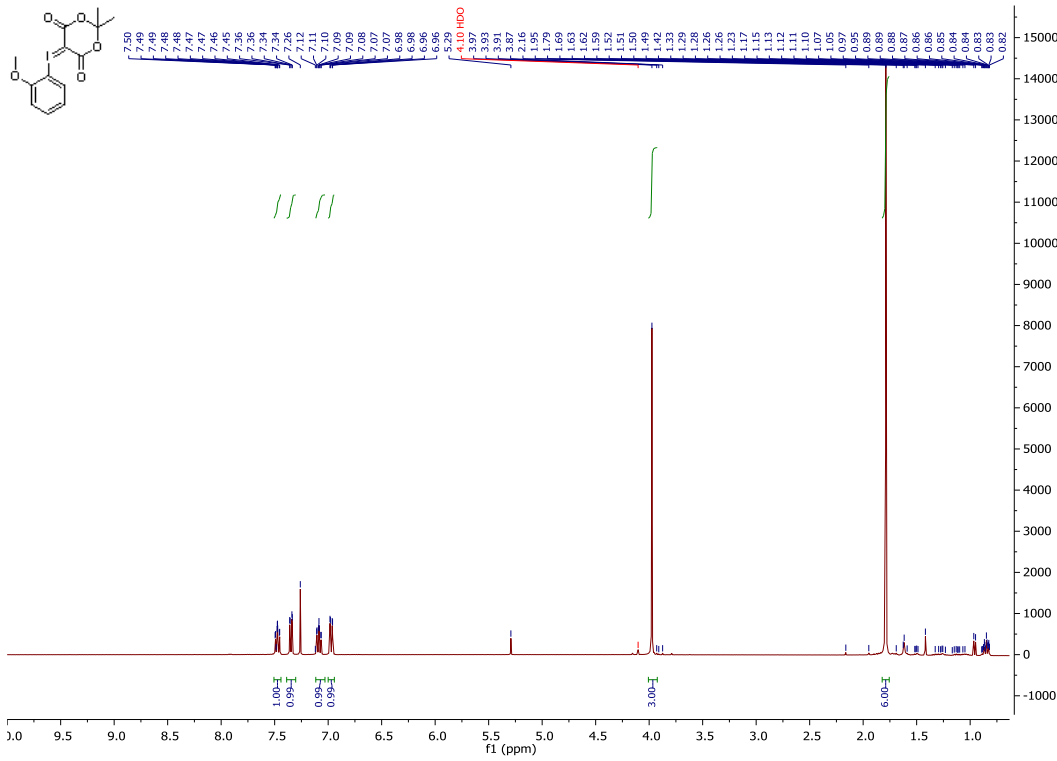

# 5-((2-methoxyphenyl)-13-iodaneylidene)-2,2-dimethyl-1,3-dioxane-4,6-dione

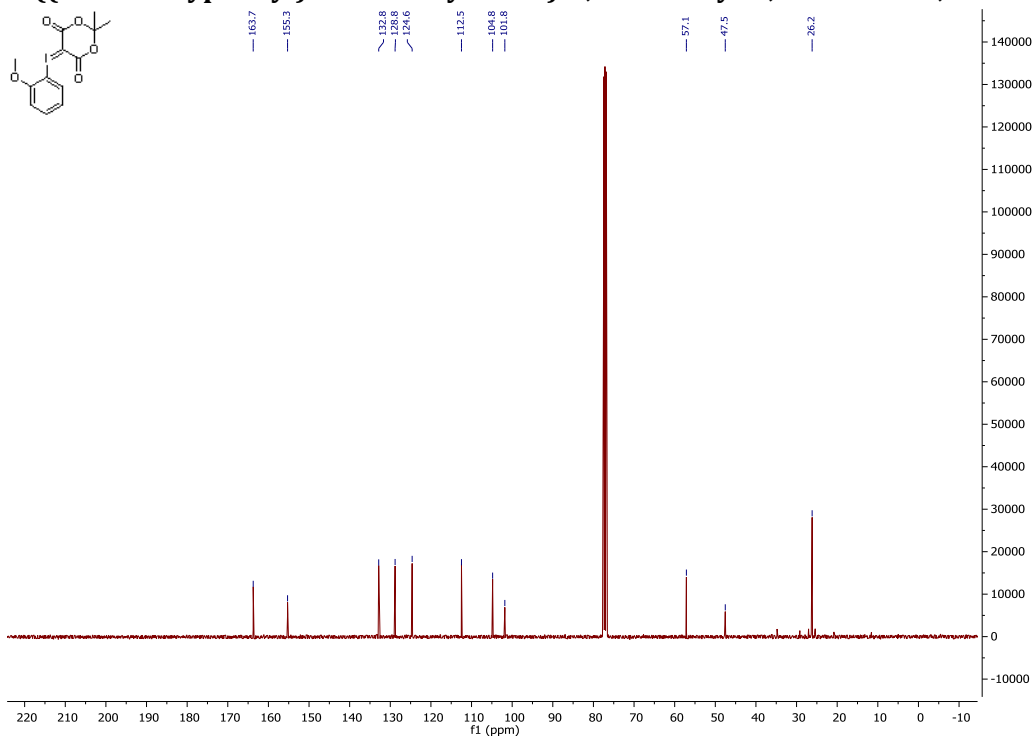

## RadioTLC

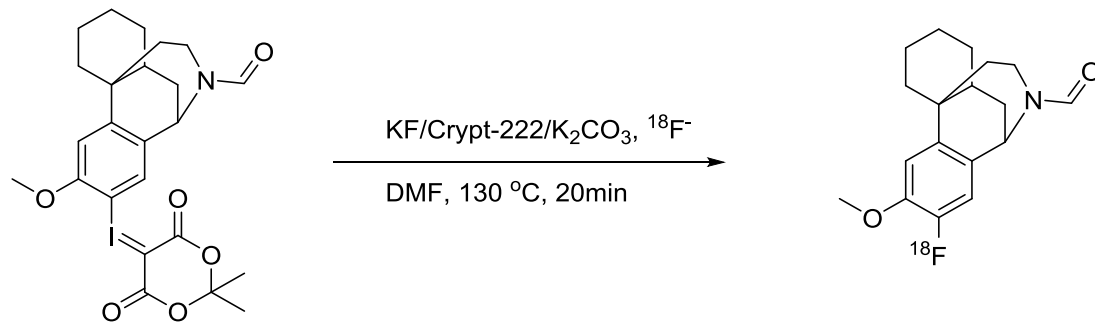

Crude reaction mixture radioTLC for radiofluorination experiment.

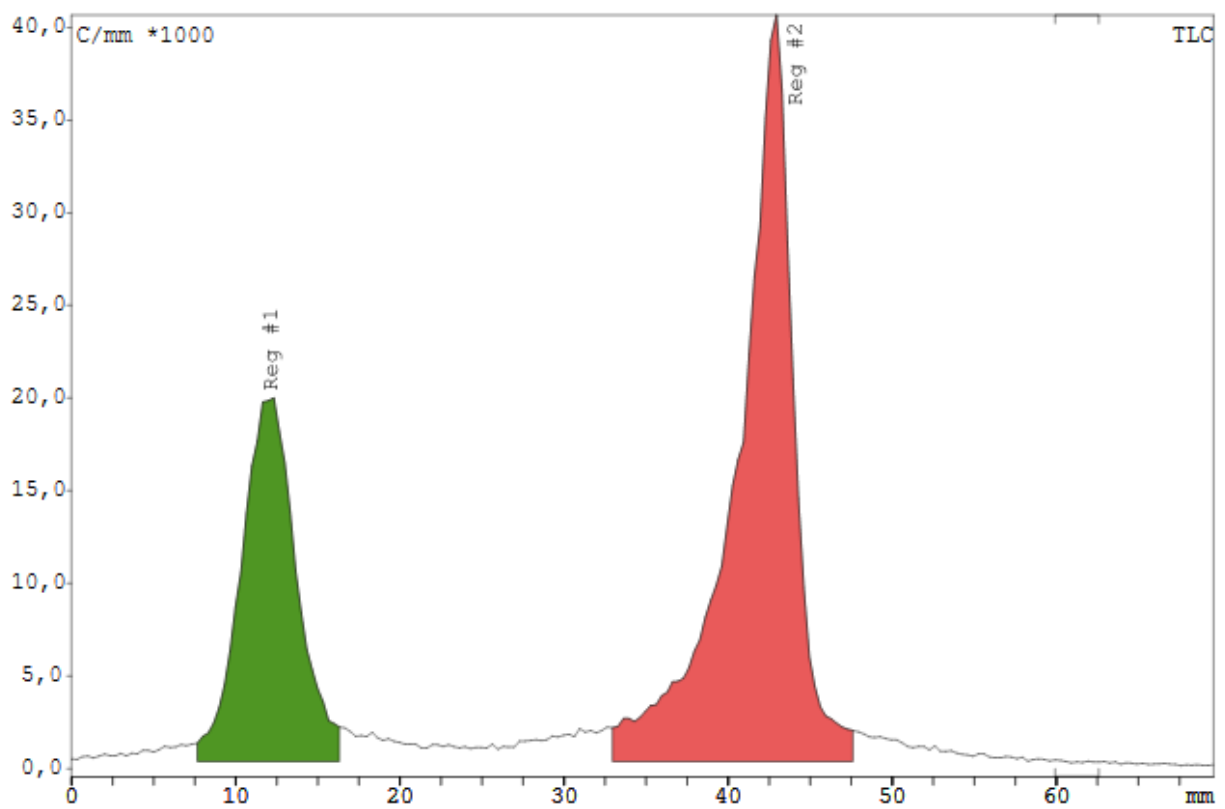

Integration TLC

| Substance       | R/F   | %Total | Type | Area     | %Area |
|-----------------|-------|--------|------|----------|-------|
|                 |       | %      |      | Counts   | %     |
| Reg #1          | 0,171 | 28,82  | DD   | 76808,8  | 32,48 |
| Reg #2          | 0,610 | 59,92  | DD   | 159701,5 | 67,52 |
| Sum in ROI      |       |        |      | 236510,3 |       |
| Total area      |       |        |      | 266504,4 |       |
| Area RF         |       |        |      | 266437,8 |       |
| BKG1            |       |        |      | 386,35   |       |
| Remainder RF    |       |        |      | 29927,50 | 11,23 |
| Remainder (Tot) |       |        |      | 29994,13 | 11,25 |

radioTLC after C18 and Si cartridge purification

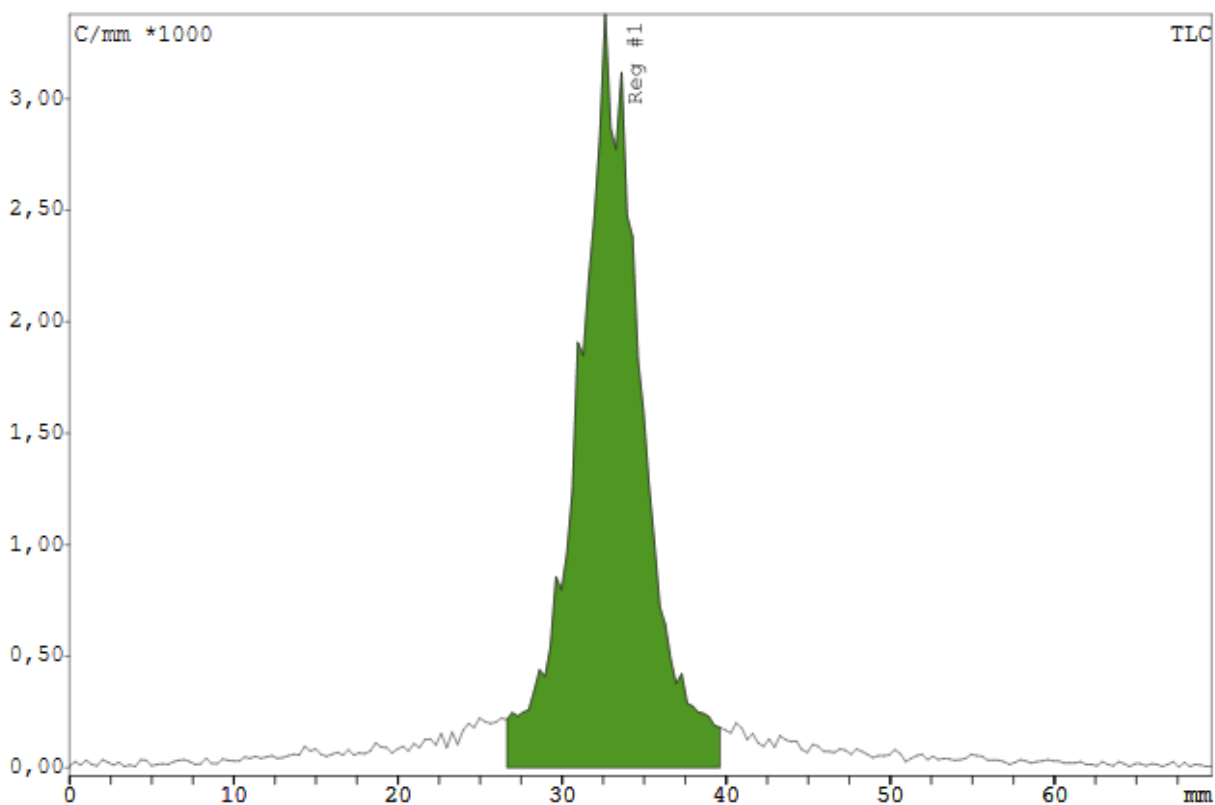



### Integration TLC

| Substance  | R/F   | %Total | Type | Area     | %Area  |
|------------|-------|--------|------|----------|--------|
|            |       | %      |      | Counts   | %      |
| Reg #1     | 0,471 | 81,20  | DD   | 14932,00 | 100,00 |
| Sum in ROI |       |        |      | 14932,00 |        |
| Total area |       |        |      | 18390,00 |        |
| Area RF    |       |        |      | 18392,00 |        |

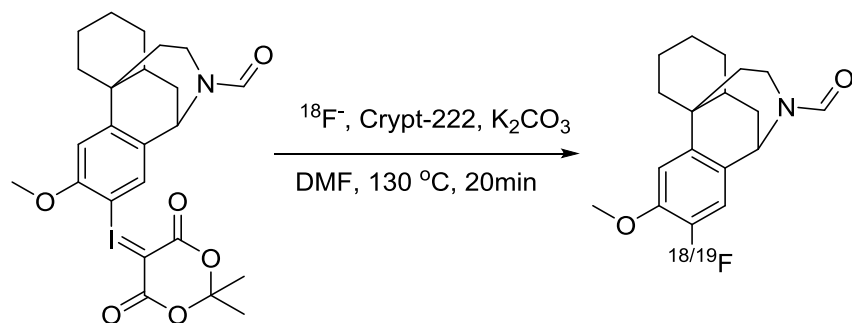

Crude reaction mixture radioTLC for carrier added radiofluorination experiment.

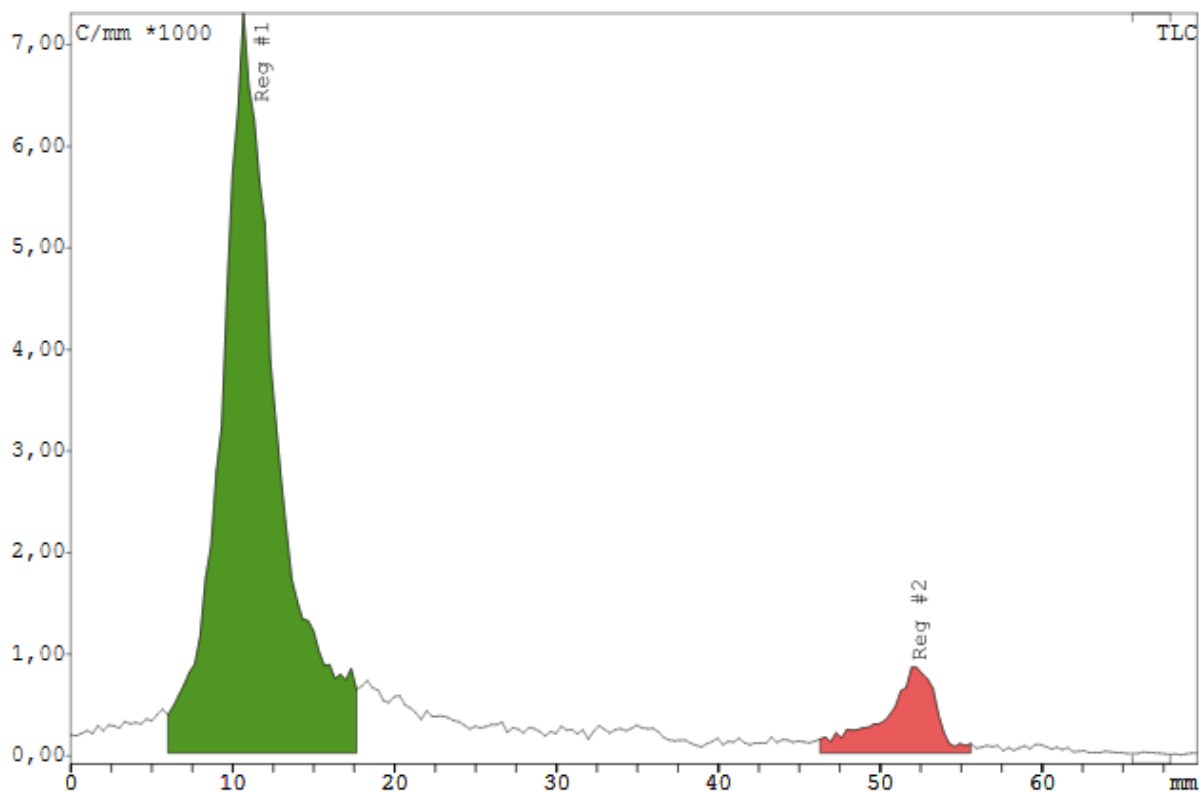

Integration TLC

| Substance       | R/F   | %Total | Type | Area     | %Area |
|-----------------|-------|--------|------|----------|-------|
|                 |       | %      |      | Counts   | %     |
| Reg #1          | 0,152 | 70,15  | DD   | 28978,00 | 90,04 |
| Reg #2          | 0,748 | 7,76   | DD   | 3204,00  | 9,96  |
| Sum in ROI      |       |        |      | 32182,00 |       |
| Total area      |       |        |      | 41308,29 |       |
| Area RF         |       |        |      | 41308,00 |       |
| BKG1            |       |        |      | 27,892   |       |
| Remainder RF    |       |        |      | 9126,00  | 22,09 |
| Remainder (Tot) |       |        |      | 9126,29  | 22,09 |

radioTLC after C18 and Si cartridge purification

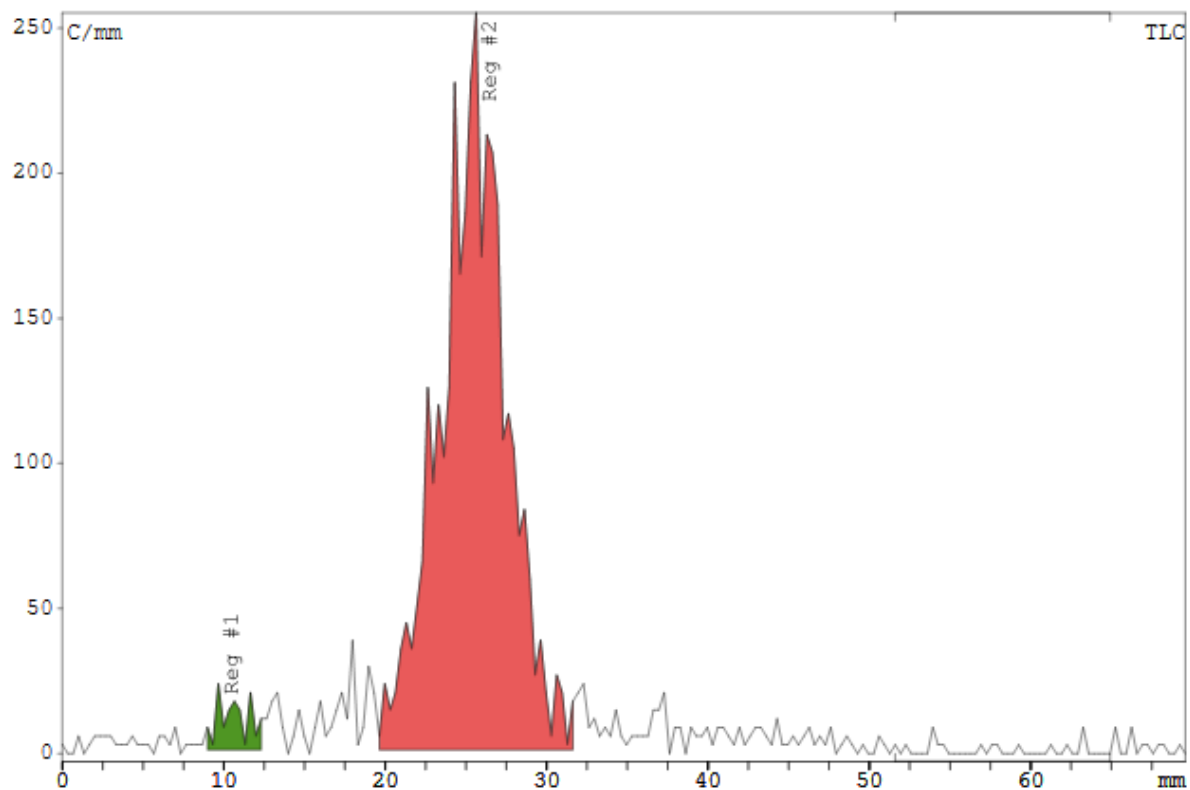

Integration TLC

| Substance       | R/F   | %Total | Type | Area     | %Area |
|-----------------|-------|--------|------|----------|-------|
|                 |       | %      |      | Counts   | %     |
| Reg #1          | 0,148 | 2,67   | DD   | 37,000   | 3,19  |
| Reg #2          | 0,371 | 80,84  | DD   | 1121,600 | 96,81 |
| Sum in ROI      |       |        |      | 1158,600 |       |
| Total area      |       |        |      | 1387,400 |       |
| Area RF         |       |        |      | 1388,000 |       |
| BKG1            |       |        |      | 1,2015   |       |
| Remainder RF    |       |        |      | 229,40   | 16,53 |
| Remainder (Tot) |       |        |      | 228,80   | 16,49 |

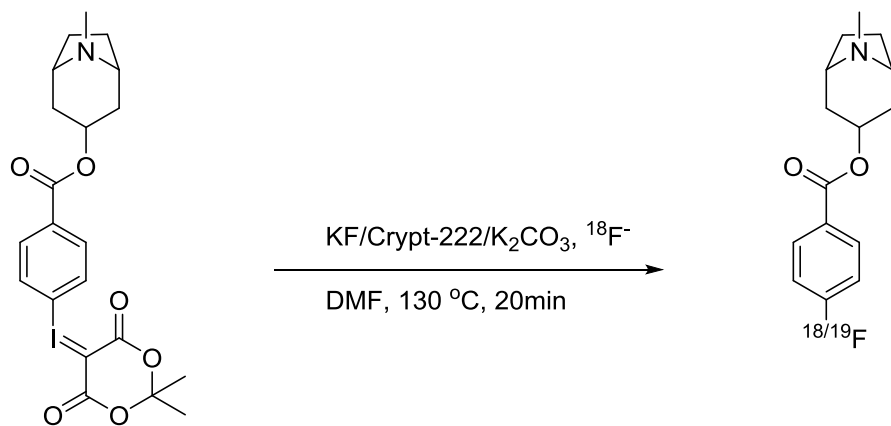

Crude reaction mixture radioTLC for radiofluorination experiment.

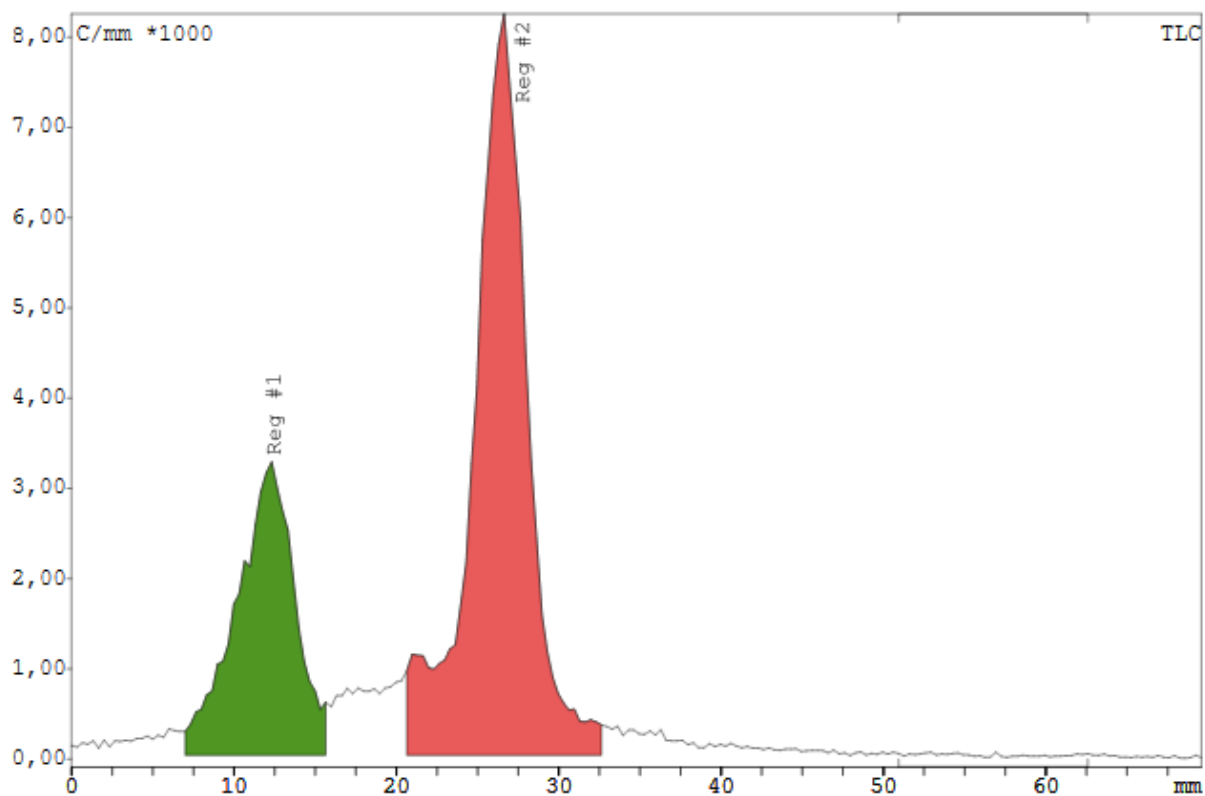

Integration TLC

| Substance       | R/F   | %Total | Type | Area     | %Area |
|-----------------|-------|--------|------|----------|-------|
|                 |       | %      |      | Counts   | %     |
| Reg #1          | 0,176 | 25,98  | DD   | 13447,83 | 29,86 |
| Reg #2          | 0,381 | 61,03  | DD   | 31586,69 | 70,14 |
| Sum in ROI      |       |        |      | 45034,51 |       |
| Total area      |       |        |      | 51756,31 |       |
| Area RF         |       |        |      | 51756,00 |       |
| BKG1            |       |        |      | 42,996   |       |
| Remainder RF    |       |        |      | 6721,49  | 12,99 |
| Remainder (Tot) |       |        |      | 6721,80  | 12,99 |

radioTLC after C18 and Si cartridge purification

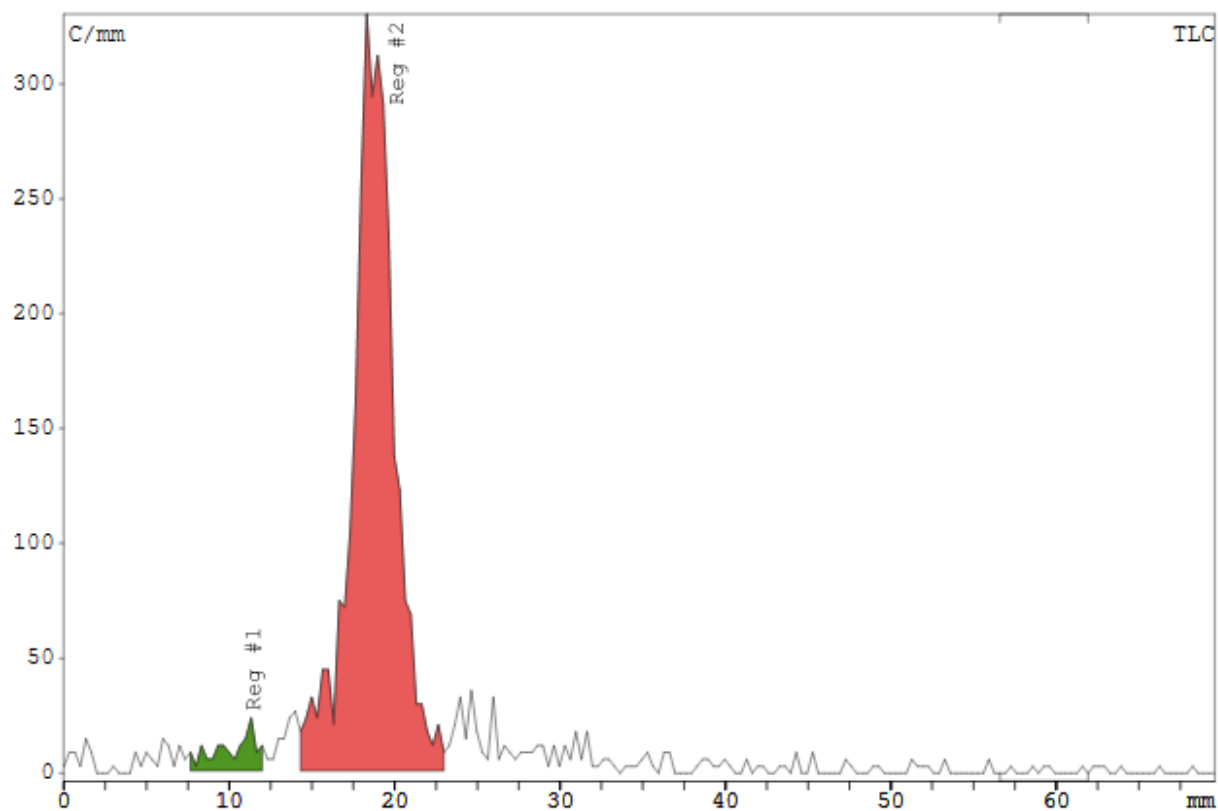

Integration TLC

| Substance       | R/F   | %Total | Type | Area      | %Area |
|-----------------|-------|--------|------|-----------|-------|
|                 |       | %      |      | Counts    | %     |
| Reg #1          | 0,162 | 3,42   | DD   | 40,9375   | 4,16  |
| Reg #2          | 0,267 | 78,87  | DD   | 943,8750  | 95,84 |
| Sum in ROI      |       |        |      | 984,8125  |       |
| Total area      |       |        |      | 1196,6875 |       |
| Area RF         |       |        |      | 1196,3750 |       |
| BKG1            |       |        |      | 0,93866   |       |
| Remainder RF    |       |        |      | 211,56    | 17,68 |
| Remainder (Tot) |       |        |      | 211,88    | 17,71 |

## NMR degradation experiment

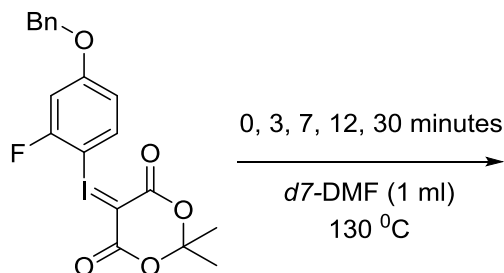

To iodonium ylide (4.7 mg, 10  $\mu$ mol) in DMF- $d_7$  (1 ml) was heated at 130 °C. At the intervals 0, 3, 7, 12 and 30 minutes was 100  $\mu$ l withdrawn, diluted with DMSO- $d_6$  and analysed via  $^1\text{H}$  NMR at a field strength of 800 MHz.

In

DMF- $d_7$

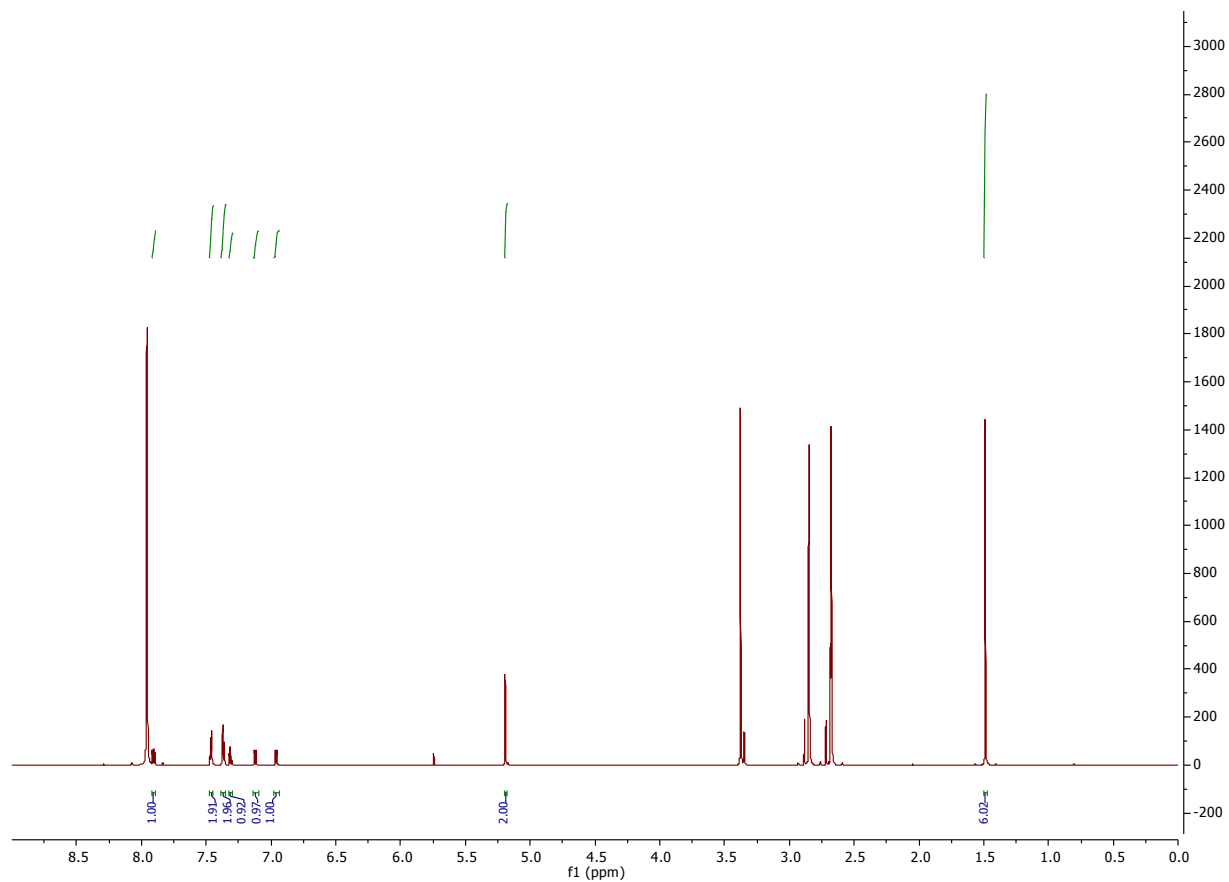

0

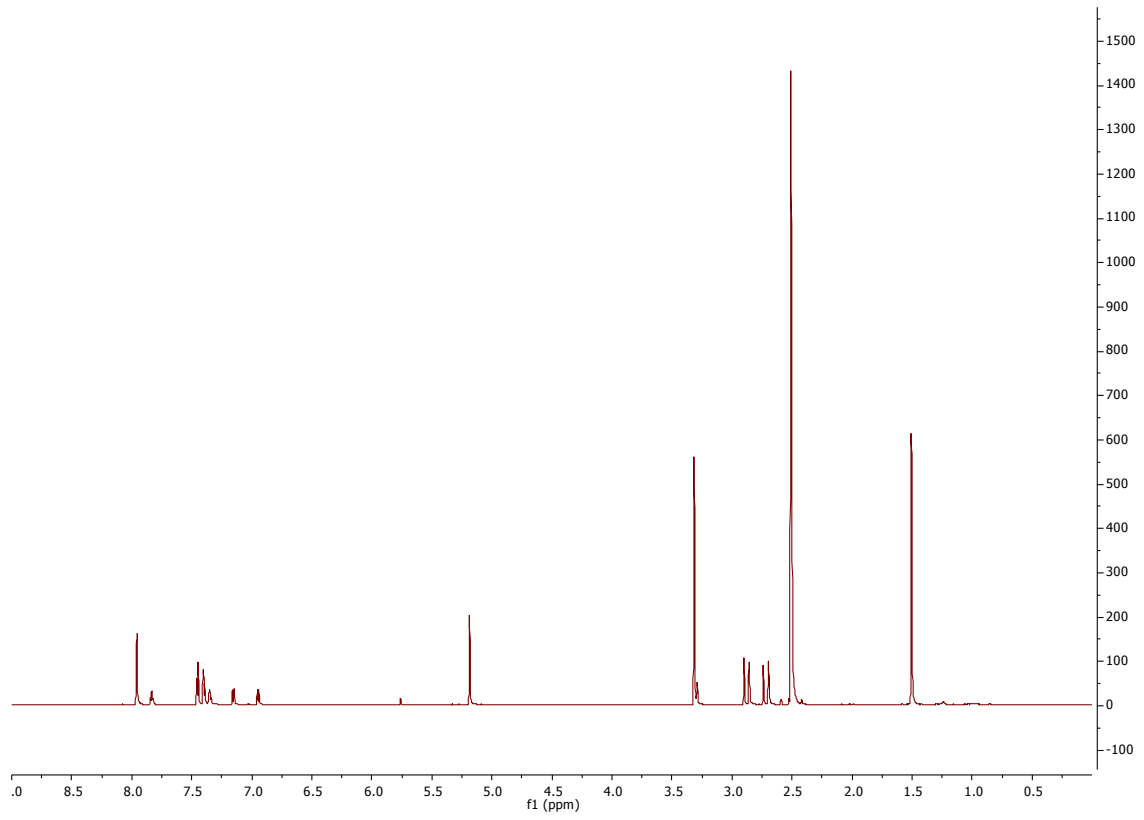

3

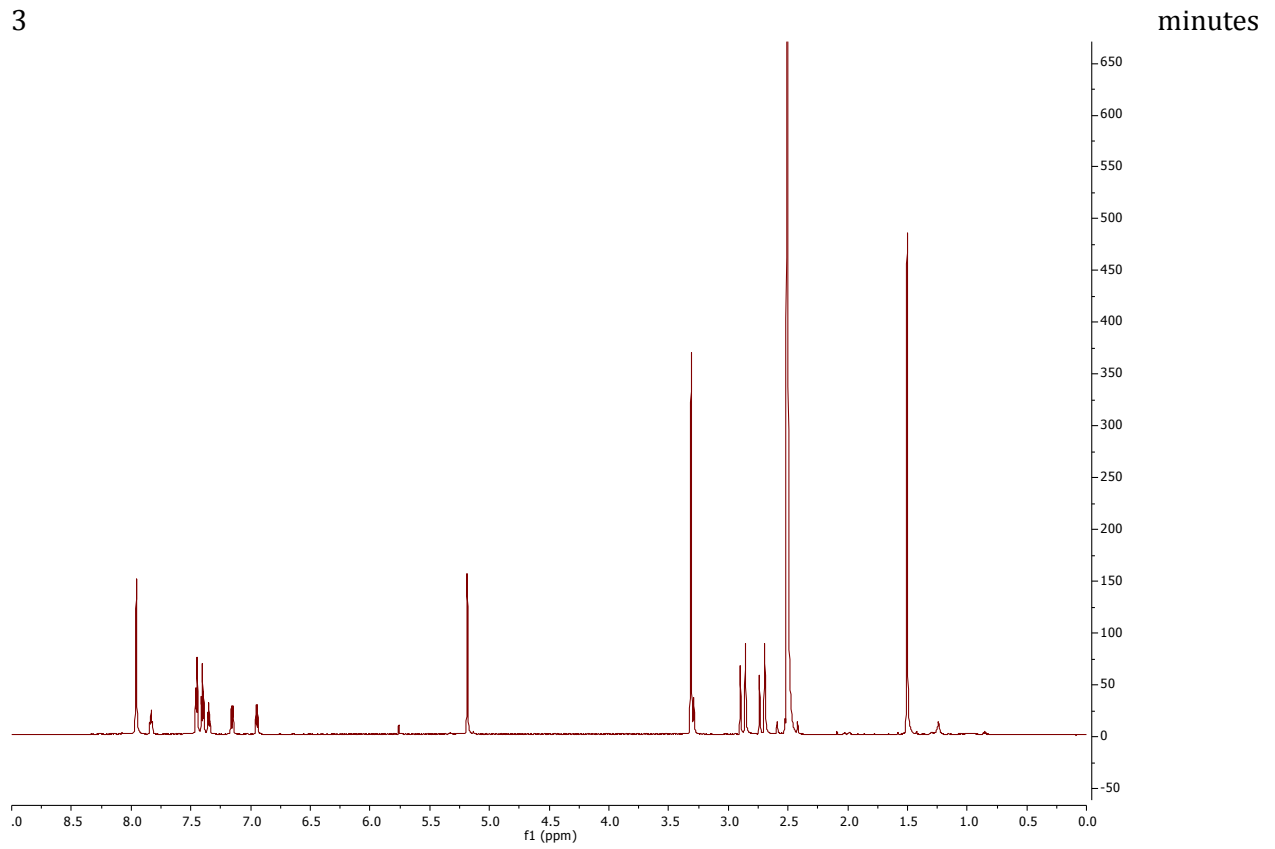

7

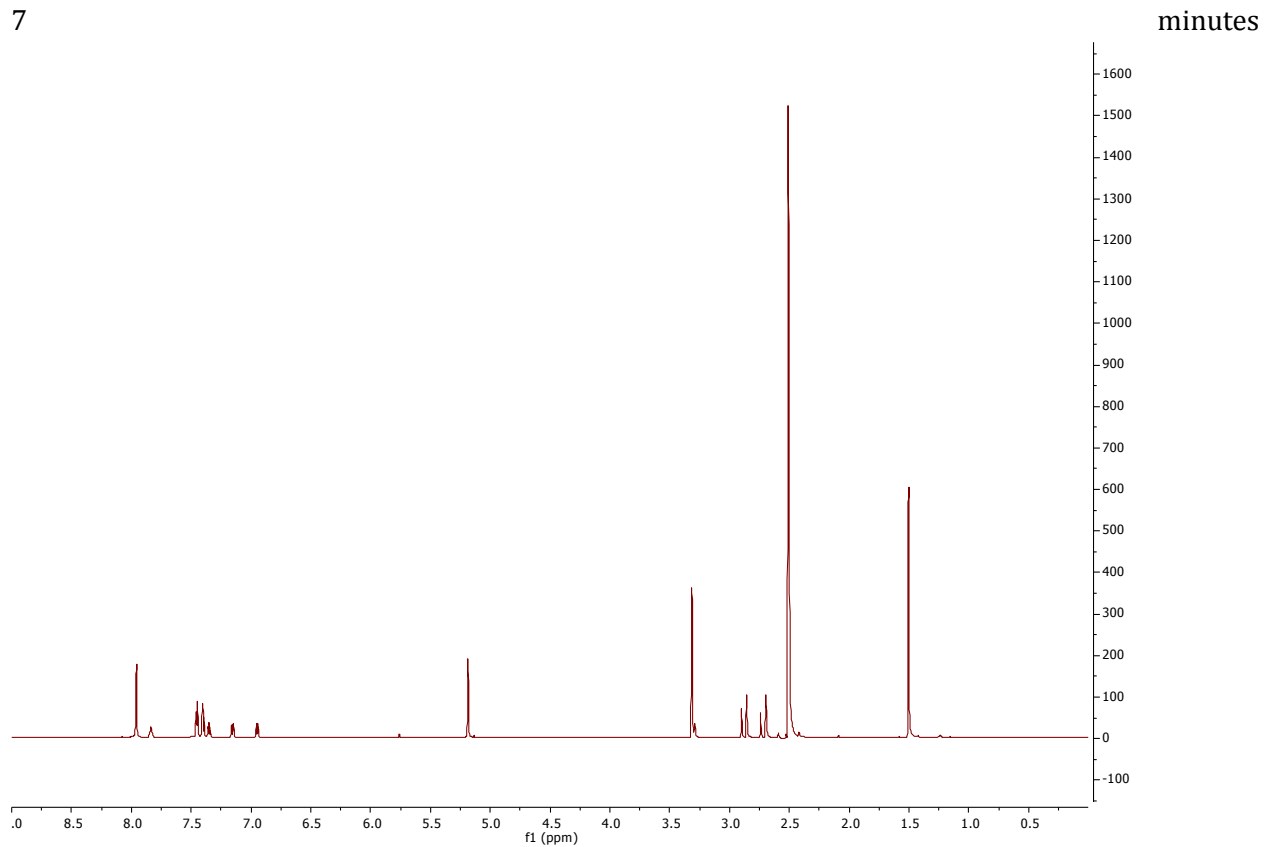

12

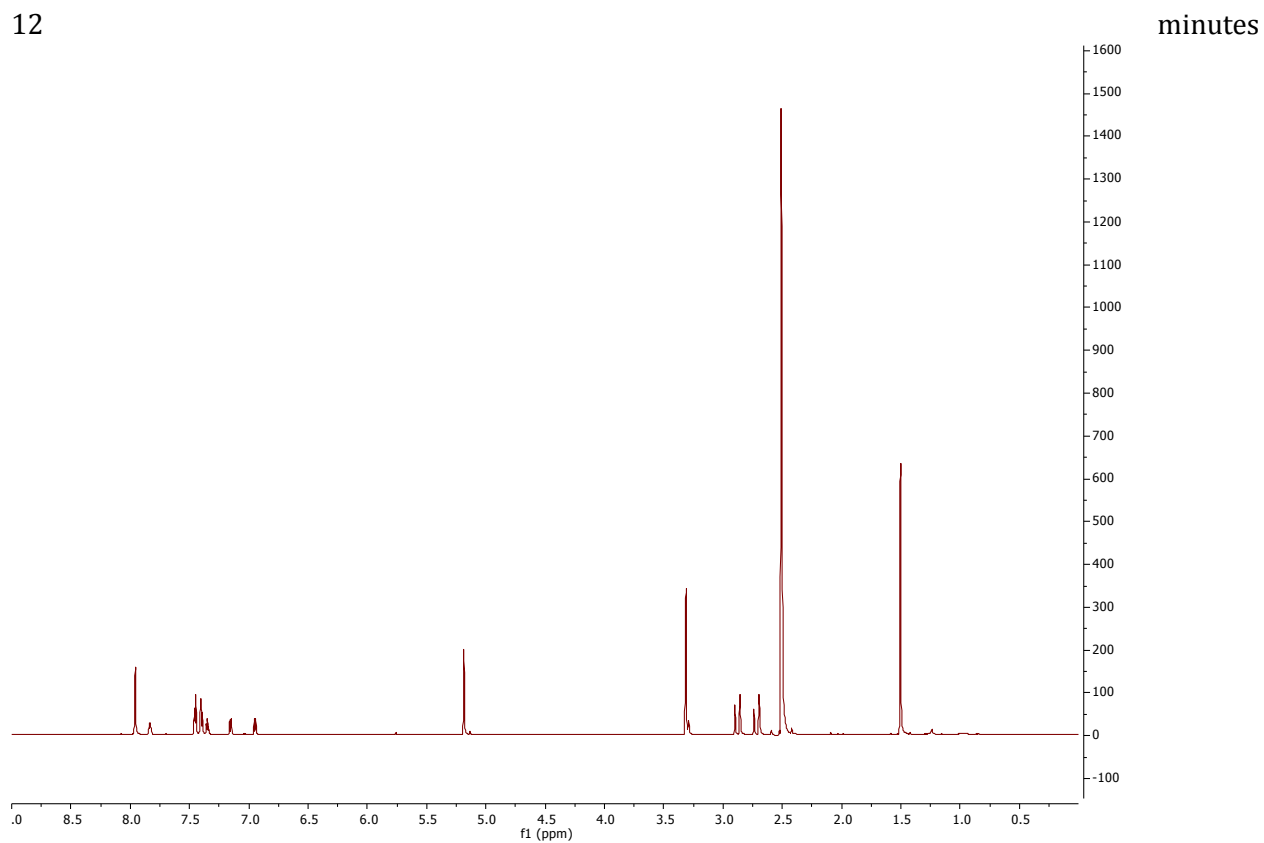



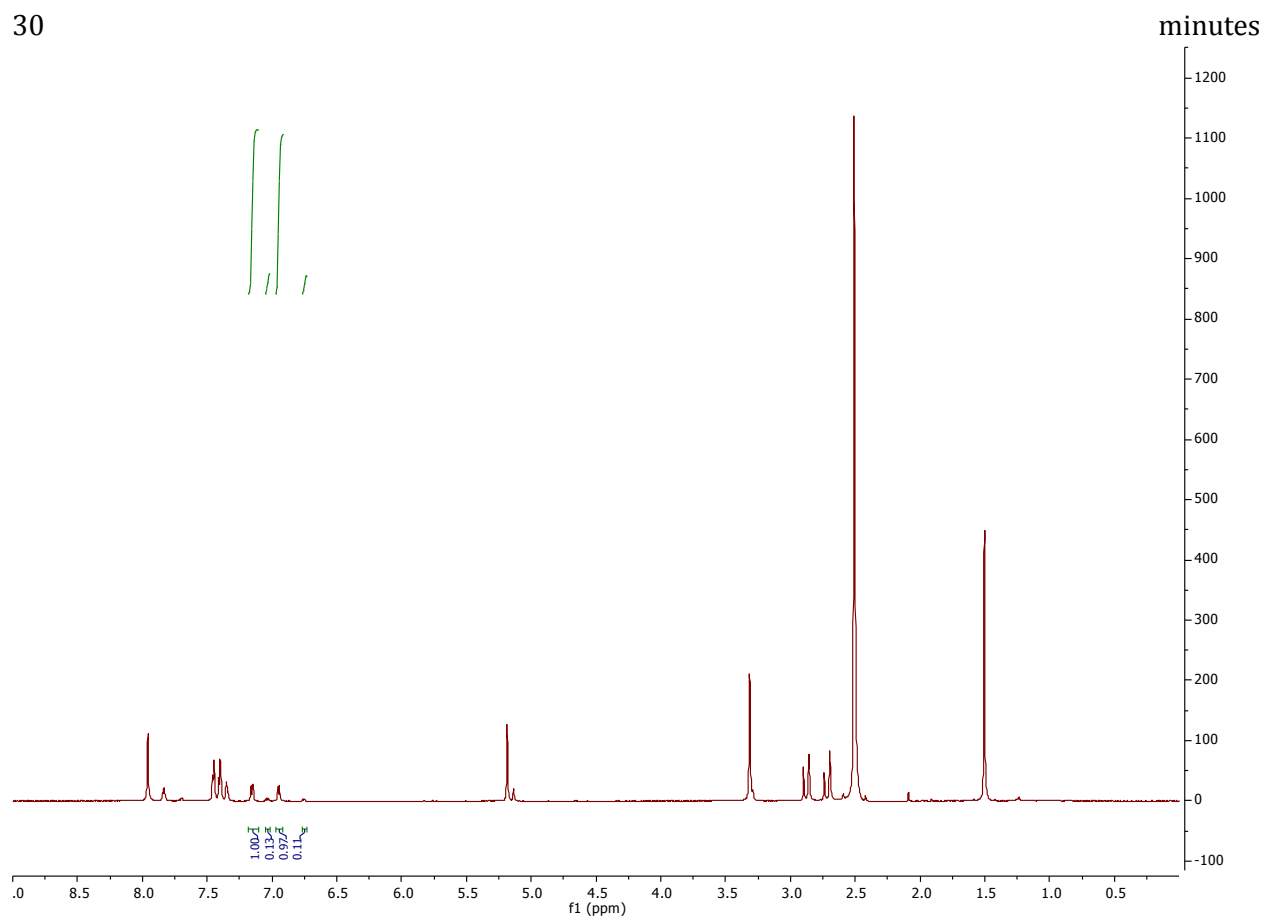

## Additional NMR spectra

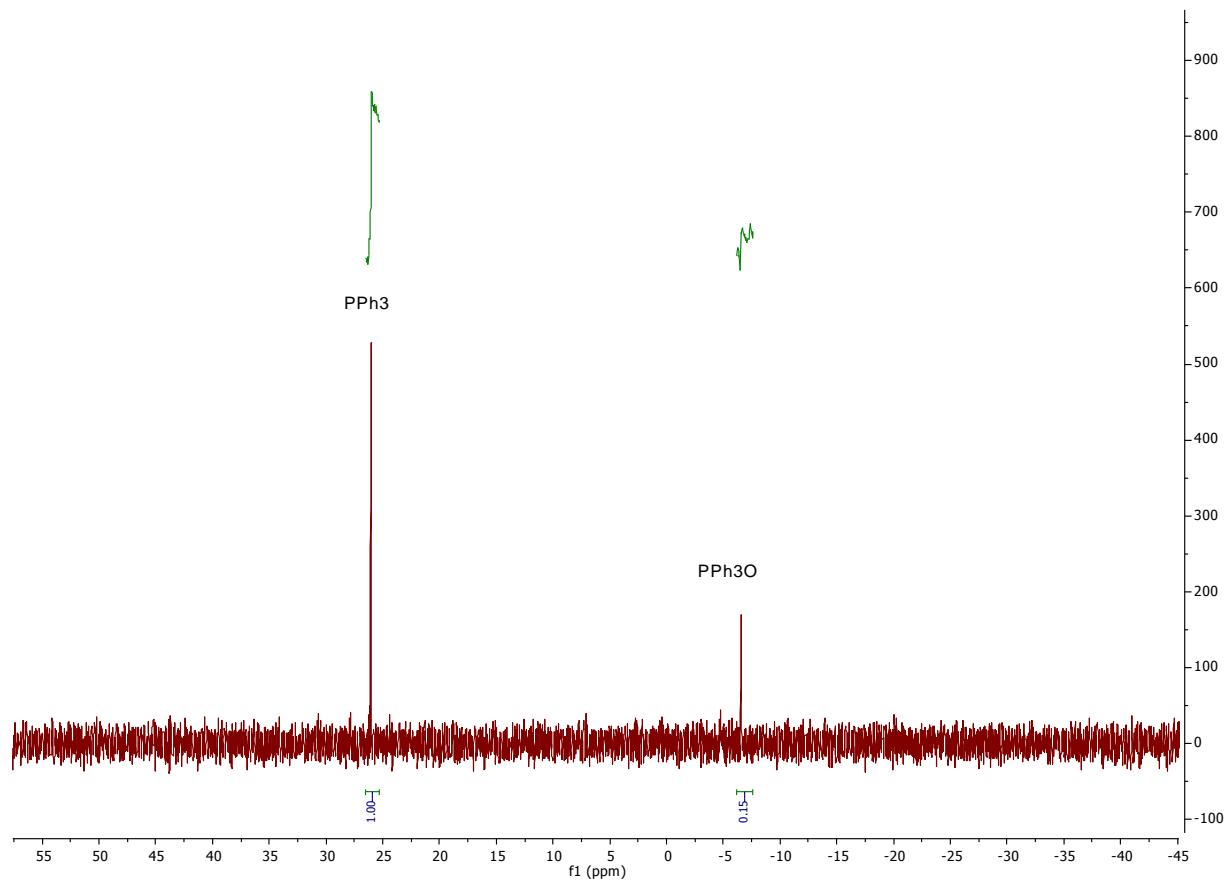

$^{31}\text{P}$  NMR following typical NMR reaction procedure with 20% added triphenylphosphane.

1. J. E. Jakobsson, G. Gronnevik and P. J. Riss, *Chem Commun (Camb)*, 2017, **53**, 12906-12909.
2. D. W. Kim, H. J. Jeong, S. T. Lim and M. H. Sohn, *Angew Chem Int Edit*, 2008, **47**, 8404-8406.
3. J. Cardinale, J. Ermert, S. Humpert and H. H. Coenen, *Rsc Adv*, 2014, **4**, 17293-17299.
4. S. R. Goudreau, D. Marcoux and A. B. Charette, *J Org Chem*, 2009, **74**, 470-473.
